# Supplementary material for: Comparative safety and effectiveness of serotonin receptor antagonists in patients undergoing chemotherapy: a systematic review and network meta-analysis
Source: PubMed Central journal article supplement (PMC5180412; doi:10.1186/s12916-016-0761-9), 2016-12-23
Supplement: 12916_2016_761_MOESM2_ESM.pdf [file 12916_2016_761_MOESM2_ESM.pdf]

# Supplementary Online Content

---

|                                                                                                                                                                                      |    |
|--------------------------------------------------------------------------------------------------------------------------------------------------------------------------------------|----|
| Appendix A. References for Included Studies.....                                                                                                                                     | 2  |
| Appendix B. Study Characteristics .....                                                                                                                                              | 20 |
| Appendix C. Patient Characteristics .....                                                                                                                                            | 32 |
| Appendix D. Aggregate Cochrane EPOC risk-of-bias appraisal results .....                                                                                                             | 47 |
| Appendix E. Cochrane EPOC risk-of-bias appraisal results .....                                                                                                                       | 48 |
| Appendix F. Newcastle-Ottawa Scale Appraisal Results .....                                                                                                                           | 53 |
| Appendix G. Comparison Adjusted Funnel Plots for patients without nausea, patients without vomiting, patients without CINV, and patients experiencing severe vomiting outcomes ..... | 54 |
| Appendix H. Results for harms outcomes analyses.....                                                                                                                                 | 55 |
| Appendix I. Aggregate Mcharms appraisal results.....                                                                                                                                 | 58 |
| Appendix J. Results for Mcharms appraisal .....                                                                                                                                      | 60 |
| Appendix K. Results of the primary Network meta-analysis for effectiveness outcomes .....                                                                                            | 62 |
| Appendix L. No. of patients without nausea – RCTs and adults only.....                                                                                                               | 67 |
| Appendix M. No. of patients without nausea – RCTs and adults only – SUCRA values for each treatment .....                                                                            | 68 |
| Appendix N. No. of patients without nausea sub-group analysis for Network meta-analysis.....                                                                                         | 69 |
| Appendix O. No. of patients without vomiting – RCTs only .....                                                                                                                       | 72 |
| Appendix P. No. of patients without vomiting – RCTs only – SUCRA values for each treatment .....                                                                                     | 73 |
| Appendix Q. No. of patients without vomiting sub-group analysis for Network meta-analysis.....                                                                                       | 74 |
| Appendix R. No. of patients without CINV – RCTs only .....                                                                                                                           | 77 |
| Appendix S. No. of patients without CINV – RCTs only – SUCRA values for each treatment .....                                                                                         | 78 |
| Appendix T. No. of patients without CINV sub-group analysis for Network meta-analysis.....                                                                                           | 79 |
| Appendix U. No. of patients experiencing severe vomiting – RCTs only .....                                                                                                           | 81 |
| Appendix V. No. of patients experiencing severe vomiting – RCTs only – SUCRA values for each treatment .....                                                                         | 82 |
| Appendix W. No. of patients experiencing severe vomiting sub-group analysis for Network meta-analysis.....                                                                           | 83 |
| Appendix X. Included studies in our review versus previous systematic reviews .....                                                                                                  | 85 |
| Appendix Y. List of excluded studies from previous systematic reviews .....                                                                                                          | 90 |

## Appendix A. References for Included Studies

Primary studies (295 publications reporting on 299 studies): [1-250] [251-289] [290-295]

Companion Reports (n =18): [296-313]

1. Ondansetron versus granisetron, both combined with dexamethasone, in the prevention of cisplatin-induced emesis. Italian Group of Antiemetic Research. *Ann Oncol.* 1995;6(8):805-10.
2. A double-blind randomized study comparing intramuscular (i.m.) granisetron with i.m. granisetron plus dexamethasone in the prevention of delayed emesis induced by cisplatin. The Italian Multicenter Study Group. *Anticancer Drugs.* 1999;10(5):465-70.
3. Apro MS, Grunberg SM, Manikhas GM, Olivares G, Suarez T, Tjulandin SA, et al. A phase III, double-blind, randomized trial of palonosetron compared with ondansetron in preventing chemotherapy-induced nausea and vomiting following highly emetogenic chemotherapy. *Ann Oncol.* 2006;17(9):1441-9.
4. Apro MS, Thuerlimann B, Sessa C, De Pree C, Bernhard J, Maibach R, et al. A randomized double-blind trial to compare the clinical efficacy of granisetron with metoclopramide, both combined with dexamethasone in the prophylaxis of chemotherapy-induced delayed emesis. *Ann Oncol.* 2003;14(2):291-7.
5. Abali H, Celik I. Tropisetron, ondansetron, and granisetron for control of chemotherapy-induced emesis in Turkish cancer patients: a comparison of efficacy, side-effect profile, and cost. *Cancer Invest.* 2007;25(3):135-9.
6. Abang AM, Takemoto MH, Pham T, Mandanas RA, Roy V, Selby GB, et al. Efficacy and safety of oral granisetron versus i.v. granisetron in patients undergoing peripheral blood progenitor cell and bone marrow transplantation. *Anticancer Drugs.* 2000;11(2):137-42.
7. Adams M, Soukop M, Barley V, Yosef H, Anderson H, Boesen E, et al. Tropisetron alone or in combination with dexamethasone for the prevention and treatment of emesis induced by non-cisplatin chemotherapy: a randomized trial. *Anticancer Drugs.* 1995;6(4):514-21.
8. Addelman M, Erlichman C, Fine S, Warr D, Murray C. Phase I/II trial of granisetron: a novel 5-hydroxytryptamine antagonist for the prevention of chemotherapy-induced nausea and vomiting. *J Clin Oncol.* 1990;8(2):337-41.
9. Advani SH, Gopal R, Dhar AK, Lal HM, Cooverji ND. Comparative evaluation of the clinical efficacy and safety of ondansetron and metoclopramide in the prophylaxis of emesis induced by cancer chemotherapy regimens including cisplatin. *J Assoc Physicians India.* 1996;44(2):127-30.
10. Agura ED, Brown MC, Schaffer R, Donaldson G, Shen DD. Antiemetic efficacy and pharmacokinetics of intravenous ondansetron infusion during chemotherapy conditioning for bone marrow transplant. *Bone Marrow Transplant.* 1995;16(2):213-22.
11. Ahn MJ, Lee JS, Lee KH, Suh C, Choi SS, Kim SH. A randomized double-blind trial of ondansetron alone versus in combination with dexamethasone versus in combination with dexamethasone and lorazepam in the prevention of emesis due to cisplatin-based chemotherapy. *Am J Clin Oncol.* 1994;17(2):150-6.
12. Aksoylar S, Akman SA, Ozgenc F, Kansoy S. Comparison of tropisetron and granisetron in the control of nausea and vomiting in children receiving combined cancer chemotherapy. *Pediatr Hematol Oncol.* 2001;18(6):397-406.
13. Alfieri AB, Cubeddu LX. Comparative efficacy of a single oral dose of ondansetron and of buspirone against cisplatin-induced emesis in cancer patients. *Br J Cancer.* 1995;72(4):1013-5.
14. Alvarez O, Freeman A, Bedros A, Call SK, Volsch J, Kalbermatter O, et al. Randomized double-blind crossover ondansetron-dexamethasone versus ondansetron-placebo study for the treatment of chemotherapy-induced nausea and vomiting in pediatric patients with malignancies. *J Pediatr Hematol Oncol.* 1995;17(2):145-50.
15. Audhuy B, Cappelaere P, Martin M, Cervantes A, Fabbro M, Riviere A, et al. A double-blind, randomised comparison of the anti-emetic efficacy of two intravenous doses of dolasetron mesilate and granisetron in patients receiving high dose cisplatin chemotherapy. *European journal of cancer.* 1996;32A(5):807-13.
16. Babaoglu MO, Bayar B, Aynacioglu AS, Kerb R, Abali H, Celik I, et al. Association of the ABCB1 3435C>T polymorphism with antiemetic efficacy of 5-hydroxytryptamine type 3 antagonists. *Clin Pharmacol Ther.* 2005;78(6):619-26.

17. Barrajon E, de las Penas R. Randomised double blind crossover study comparing ondansetron, granisetron and tropisetron. A cost-benefit analysis. *Support Care Cancer*. 2000;8(4):323-33.
18. Barrenetxea G, Schneider J, Centeno MM, Romero H, de la Rica M, Rodriguez-Escudero FJ. Chemotherapy-induced emesis: management of early and delayed emesis in milder emetogenic regimens. *Cancer Chemother Pharmacol*. 1996;38(5):471-5.
19. Beck TM, Ciociola AA, Jones SE, Harvey WH, Tchekmedyian NS, Chang A, et al. Efficacy of oral ondansetron in the prevention of emesis in outpatients receiving cyclophosphamide-based chemotherapy. The Ondansetron Study Group. *Ann Intern Med*. 1993;118(6):407-13.
20. Beck TM, Hesketh PJ, Madajewicz S, Navari RM, Pendergrass K, Lester EP, et al. Stratified, randomized, double-blind comparison of intravenous ondansetron administered as a multiple-dose regimen versus two single-dose regimens in the prevention of cisplatin-induced nausea and vomiting. *J Clin Oncol*. 1992;10(12):1969-75.
21. Beck TM, York M, Chang A, Navari R, Harvey WH, Meshad M, et al. Oral ondansetron 8 mg twice daily is as effective as 8 mg three times daily in the prevention of nausea and vomiting associated with moderately emetogenic cancer chemotherapy. S3A-376 Study Group. *Cancer Invest*. 1997;15(4):297-303.
22. Belkacemi Y, Ozsahin M, Pene F, Rio B, Sutton L, Laporte JP, et al. Total body irradiation prior to bone marrow transplantation: efficacy and safety of granisetron in the prophylaxis and control of radiation-induced emesis. *Int J Radiat Oncol Biol Phys*. 1996;36(1):77-82.
23. Berrak SG, Ozdemir N, Bakirci N, Turkkan E, Canpolat C, Beker B, et al. A double-blind, crossover, randomized dose-comparison trial of granisetron for the prevention of acute and delayed nausea and emesis in children receiving moderately emetogenic carboplatin-based chemotherapy. *Support Care Cancer*. 2007;15(10):1163-8.
24. Bhatia A, Tripathi KD, Sharma M. Comparison of ondansetron with metoclopramide in prevention of acute emesis associated with low dose & high dose cisplatin chemotherapy. *Indian J Med Res*. 2003;118:33-41.
25. Birch R, Weaver CH, Carson K, Buckner CD. A randomized trial of once vs twice daily administration of intravenous granisetron with dexamethosone in patients receiving high-dose cyclophosphamide, thiopeta and carboplatin. *Bone Marrow Transplant*. 1998;22(7):685-8.
26. Blazer M, Phillips G, Reardon J, Efries D, Smith Y, Weatherby L, et al. Antiemetic control with palonosetron in patients with gastrointestinal cancer receiving a fluoropyrimidine-based regimen in addition to either irinotecan or oxaliplatin: a retrospective study. *Oncology*. 2012;83(3):135-40.
27. Bleiberg HH, Spielmann M, Falkson G, Romain D. Antiemetic treatment with oral granisetron in patients receiving moderately emetogenic chemotherapy: a dose-ranging study. *Clin Ther*. 1995;17(1):38-51.
28. Blijham GH. Dose granisetron remain effective over multiple cycles? The Granisetron Study Group. *European journal of cancer*. 1992;28A Suppl 1:S17-21.
29. Boccia R, Grunberg S, Franco-Gonzales E, Rubenstein E, Voisin D. Efficacy of oral palonosetron compared to intravenous palonosetron for the prevention of chemotherapy-induced nausea and vomiting associated with moderately emetogenic chemotherapy: a phase 3 trial. *Support Care Cancer*. 2013;21(5):1453-60.
30. Boccia RV, Gordan LN, Clark G, Howell JD, Grunberg SM, Sancuso Study G. Efficacy and tolerability of transdermal granisetron for the control of chemotherapy-induced nausea and vomiting associated with moderately and highly emetogenic multi-day chemotherapy: a randomized, double-blind, phase III study. *Support Care Cancer*. 2011;19(10):1609-17.
31. Bonnetterre J, Chevallier B, Metz R, Fargeot P, Pujade-Lauraine E, Spielmann M, et al. A randomized double-blind comparison of ondansetron and metoclopramide in the prophylaxis of emesis induced by cyclophosphamide, fluorouracil, and doxorubicin or epirubicin chemotherapy. *J Clin Oncol*. 1990;8(6):1063-9.
32. Bonnetterre J, Hecquet B. Granisetron (IV) compared with ondansetron (IV plus oral) in the prevention of nausea and vomiting induced by moderately-emetogenic chemotherapy. A cross-over study. *Bull Cancer*. 1995;82(12):1038-43.
33. Bosi A, Guidi S, Messori A, Saccardi R, Lombardini L, Vannucchi AM, et al. Ondansetron versus chlorpromazine for preventing emesis in bone marrow transplant recipients: a double-blind randomized study. *J Chemother*. 1993;5(3):191-6.

34. Bots MW, Dijkstra HJ, Blijham GH, van der Wall E, Fehmers MC, Keizer HJ, et al. A randomized trial of two doses of granisetron in the treatment of chemotherapy-induced emesis. Dutch results within a multinational study. *Neth J Med*. 1992;40(5-6):221-6.
35. Brock P, Brichard B, Rechnitzer C, Langeveld NE, Lanning M, Soderhall S, et al. An increased loading dose of ondansetron: a north european, double-blind randomised study in children, comparing 5 mg/m<sup>2</sup> with 10 mg/m<sup>2</sup>. *European journal of cancer*. 1996;32A(10):1744-8.
36. Brown RS, Brown TK, Hoare D, Gaze MN. An audit of antiemetic use with CMF chemotherapy. *Clin Oncol (R Coll Radiol)*. 1998;10(5):313-7.
37. Buser KS, Joss RA, Piquet D, Aapro MS, Cavalli F, Haefliger JM, et al. Oral ondansetron in the prophylaxis of nausea and vomiting induced by cyclophosphamide, methotrexate and 5-fluorouracil (CMF) in women with breast cancer. Results of a prospective, randomized, double-blind, placebo-controlled study. *Ann Oncol*. 1993;4(6):475-9.
38. Buyukavci M, Olgun H, Ceviz N. The effects of ondansetron and granisetron on electrocardiography in children receiving chemotherapy for acute leukemia. *Am J Clin Oncol*. 2005;28(2):201-4.
39. Carmichael J, Bessell EM, Harris AL, Hutcheon AW, Dawes PJ, Daniels S, et al. Comparison of granisetron alone and granisetron plus dexamethasone in the prophylaxis of cytotoxic-induced emesis. *Br J Cancer*. 1994;70(6):1161-4.
40. Carmichael J, Harris AL. High-dose i.v. granisetron for the prevention of chemotherapy-induced emesis: cardiac safety and tolerability. *Anticancer Drugs*. 2003;14(9):739-44.
41. Chang CS, Chen LT, Huang SM, Liu TC, Lin SF, Chen TP, et al. Comparison of intravenous granisetron with metoclopramide plus dexamethasone in the prevention of nausea and vomiting associated with emetogenic cytotoxic chemotherapy. *Kaohsiung J Med Sci*. 1997;13(2):97-102.
42. Cheirsilpa A, Sinthusake T, Songsakkaesorn A, Visawaprasit S, Chulaka K, Changkuingdee N. Comparison of ramosetron and granisetron for the prevention of acute and delayed emesis in Cisplatin-based chemotherapy: a randomized controlled trial. *Jpn J Clin Oncol*. 2005;35(12):695-9.
43. Chen PT, Liaw CC. Intravenous ondansetron plus intravenous dexamethasone with different ondansetron dosing schedules during multiple cycles of cisplatin-based chemotherapy. *Chang Gung Med J*. 2008;31(2):167-74.
44. Chevallier B. The control of acute cisplatin-induced emesis--a comparative study of granisetron and a combination regimen of high-dose metoclopramide and dexamethasone. *Granisetron Study Group*. *Br J Cancer*. 1993;68(1):176-80.
45. Chevallier B, Cappelaere P, Splinter T, Fabbro M, Wendling JL, Cals L, et al. A double-blind, multicentre comparison of intravenous dolasetron mesilate and metoclopramide in the prevention of nausea and vomiting in cancer patients receiving high-dose cisplatin chemotherapy. *Support Care Cancer*. 1997;5(1):22-30.
46. Chevallier B, Marty M, Paillarse JM. Methylprednisolone enhances the efficacy of ondansetron in acute and delayed cisplatin-induced emesis over at least three cycles. *Ondansetron Study Group*. *Br J Cancer*. 1994;70(6):1171-5.
47. Chiou TJ, Tzeng WF, Wang WS, Yen CC, Fan FS, Liu JH, et al. Comparison of the efficacy and safety of oral granisetron plus dexamethasone with intravenous ondansetron plus dexamethasone to control nausea and vomiting induced by moderate/severe emetogenic chemotherapy. *Zhonghua Yi Xue Za Zhi (Taipei)*. 2000;63(10):729-36.
48. Chiou TJ, Wei CH, Hsieh RK, Fan FS, Liu JH, Chen PM. Comparison of intravenous granisetron with metoclopramide in the treatment of chemotherapy-induced emesis. *Zhonghua Yi Xue Za Zhi (Taipei)*. 1995;56(1):23-30.
49. Chiu EW, Liang R, Lie A, Todd D, Chan TK. Comparison of Ondansetron with Metoclopramide in the Control of Emesis Induced by Moderately Emetogenic Chemotherapy Used for Lymphoma and Leukaemia Patients. *Drug Investigation*. 1994;8(2):104-9.
50. Chua DT, Sham JS, Kwong DL, Kwok CC, Yue A, Foo YC, et al. Comparative efficacy of three 5-HT<sub>3</sub> antagonists (granisetron, ondansetron, and tropisetron) plus dexamethasone for the prevention of cisplatin-induced acute emesis: a randomized crossover study. *Am J Clin Oncol*. 2000;23(2):185-91.
51. Conroy T, Cappelaere P, Fabbro M, Fauser AA, Splinter TA, Spielmann M, et al. Acute antiemetic efficacy and safety of dolasetron mesylate, a 5-HT<sub>3</sub> antagonist, in cancer patients treated with cisplatin. *European Dolasetron Study Group*. *Am J Clin Oncol*. 1994;17(2):97-102.

52. Contu A, Olmeo N, Piro S, Sabbatini R, Depenni R, Silingardi V, et al. A comparison of the antiemetic efficacy and safety of intramuscular and intravenous formulations of granisetron in patients receiving moderately emetogenic chemotherapy. *Anticancer Drugs*. 1995;6(5):652-6.
53. Coppes MJ, Lau R, Ingram LC, Wiernikowski JT, Grant R, Howard DR, et al. Open-label comparison of the antiemetic efficacy of single intravenous doses of dolasetron mesylate in pediatric cancer patients receiving moderately to highly emetogenic chemotherapy. *Med Pediatr Oncol*. 1999;33(2):99-105.
54. Coppes MJ, Yanofsky R, Pritchard S, Leclerc JM, Howard DR, Perrotta M, et al. Safety, tolerability, antiemetic efficacy, and pharmacokinetics of oral dolasetron mesylate in pediatric cancer patients receiving moderately to highly emetogenic chemotherapy. *J Pediatr Hematol Oncol*. 1999;21(4):274-83.
55. Corapcioglu F, Sarper N. A prospective randomized trial of the antiemetic efficacy and cost-effectiveness of intravenous and orally disintegrating tablet of ondansetron in children with cancer. *Pediatr Hematol Oncol*. 2005;22(2):103-14.
56. Crucitt MA, Hyman W, Grote T, Tester W, Madajewicz S, Yee S, et al. Efficacy and tolerability of oral ondansetron versus prochlorperazine in the prevention of emesis associated with cyclophosphamide-based chemotherapy and maintenance of health-related quality of life. *Clin Ther*. 1996;18(4):778-88.
57. Cubeddu LX, Hoffman IS, Fuenmayor NT, Finn AL. Antagonism of serotonin S3 receptors with ondansetron prevents nausea and emesis induced by cyclophosphamide-containing chemotherapy regimens. *J Clin Oncol*. 1990;8(10):1721-7.
58. Cubeddu LX, Hoffmann IS, Fuenmayor NT, Finn AL. Efficacy of ondansetron (GR 38032F) and the role of serotonin in cisplatin-induced nausea and vomiting. *N Engl J Med*. 1990;322(12):810-6.
59. Cubeddu LX, Pendergrass K, Ryan T, York M, Burton G, Meshad M, et al. Efficacy of oral ondansetron, a selective antagonist of 5-HT3 receptors, in the treatment of nausea and vomiting associated with cyclophosphamide-based chemotherapies. Ondansetron Study Group. *Am J Clin Oncol*. 1994;17(2):137-46.
60. Cunningham D, Gore M, Davidson N, Miocevich M, Manchanda M, Wells N. The real costs of emesis--an economic analysis of ondansetron vs. metoclopramide in controlling emesis in patients receiving chemotherapy for cancer. *European journal of cancer*. 1993;29A(3):303-6.
61. Cunningham D, Turner A, Hawthorn J, Rosin RD. Ondansetron with and without dexamethasone to treat chemotherapy-induced emesis. *Lancet*. 1989;1(8650):1323.
62. Cupissol DR, Serrou B, Caubel M. The efficacy of granisetron as a prophylactic anti-emetic and intervention agent in high-dose cisplatin-induced emesis. *European journal of cancer*. 1990;26 Suppl 1:S23-7.
63. Davidson N, Rapoport B, Erikstein B, L'Esperance B, Ruff P, Paska W, et al. Comparison of an orally disintegrating ondansetron tablet with the conventional ondansetron tablet for cyclophosphamide-induced emesis in cancer patients: a multicenter, double-masked study. Ondansetron Orally Disintegrating Tablet Emesis Study Group. *Clin Ther*. 1999;21(3):492-502.
64. Davidson NG, Paska W, Van Belle S, Goedhals L, McQuade B, McRae J. Ondansetron suppository: a randomised, double-blind, double-dummy, parallel-group comparison with oral ondansetron for the prevention of cyclophosphamide-induced emesis and nausea. The Ondansetron Suppository emesis study group. *Oncology*. 1997;54(5):380-6.
65. de Haan LD, de Mulder PH, Beex LV, Debruyne FM, Challoner T, de Pauw BE. The efficacy of GR38032F, an antagonist of 5-hydroxytryptamine-3 (5-HT3) in the prophylaxis of cisplatin (CDDP)-induced nausea and vomiting. *Eur J Cancer Clin Oncol*. 1988;24(8):1383-4.
66. De Mulder PH, Seynaeve C, Vermorcken JB, van Liessum PA, Mols-Jevdevic S, Allman EL, et al. Ondansetron compared with high-dose metoclopramide in prophylaxis of acute and delayed cisplatin-induced nausea and vomiting. A multicenter, randomized, double-blind, crossover study. *Ann Intern Med*. 1990;113(11):834-40.
67. de Wit M, Falkson G, Rapoport BL. Repeated use of granisetron in patients receiving cytostatic agents. *Cancer*. 1993;71(12):4043-9.
68. de Wit R, Beijnen JH, van Tellingen O, Schellens JH, de Boer-Dennert M, Verweij J. Pharmacokinetic profile and clinical efficacy of a once-daily ondansetron suppository in cyclophosphamide-induced emesis: a double blind comparative study with ondansetron tablets. *Br J Cancer*. 1996;74(2):323-6.
69. de Wit R, de Boer AC, vd Linden GH, Stoter G, Sparreboom A, Verweij J. Effective cross-over to granisetron after failure to ondansetron, a randomized double blind study in patients failing ondansetron

- plus dexamethasone during the first 24 hours following highly emetogenic chemotherapy. *Br J Cancer*. 2001;85(8):1099-101.
70. Dempsey CL, Coop AJ, Shillington A, Farley PA, Eberhardt DR, O'Briant S. Antiemetic effectiveness of ondansetron and granisetron in patients with breast cancer treated with cyclophosphamide. *Am J Health Syst Pharm*. 2004;61(8):781-6.
  71. DiBenedetto J, Jr., Cubeddu LX, Ryan T, Kish JA, Sciortino D, Beall C, et al. Ondansetron for nausea and vomiting associated with moderately emetogenic cancer chemotherapy. *Clin Ther*. 1995;17(6):1091-8.
  72. Dicato MA, Kaasa S, Campora E, Bleiberg H, Warnier P, Vindevoghel A, et al. Efficacy of twice daily versus three times daily oral ondansetron in the prevention of chemotherapy induced emesis: a randomized, single-blind, multicentre study. The Ondansetron International Emesis Study Group. *Clin Oncol (R Coll Radiol)*. 1992;4(5):275-9.
  73. Dick GS, Meller ST, Pinkerton CR. Randomised comparison of ondansetron and metoclopramide plus dexamethasone for chemotherapy induced emesis. *Arch Dis Child*. 1995;73(3):243-5.
  74. Dong X, Huang J, Cao R, Liu L. Palonosetron for prevention of acute and delayed nausea and vomiting in non-small-cell lung carcinoma patients. *Med Oncol*. 2011;28(4):1425-9.
  75. du Bois A, McKenna CJ, Andersson H, Lahousen M, Kitchener H, Pinter T, et al. A randomised, double-blind, parallel-group study to compare the efficacy and safety of ondansetron (GR38032F) plus dexamethasone with metoclopramide plus dexamethasone in the prophylaxis of nausea and emesis induced by carboplatin chemotherapy. *Oncology*. 1997;54(1):7-14.
  76. Dundee JW, McMillan CM, Yang J, Wright PM. Is ondansetron a less effective antiemetic against moderately emetic as compared with highly emetic chemotherapy? *Br J Clin Pharmacol*. 1992;33(2):200-1.
  77. Eisenberg P, Figueroa-Vadillo J, Zamora R, Charu V, Hajdenberg J, Cartmell A, et al. Improved prevention of moderately emetogenic chemotherapy-induced nausea and vomiting with palonosetron, a pharmacologically novel 5-HT<sub>3</sub> receptor antagonist: results of a phase III, single-dose trial versus dolasetron. *Cancer*. 2003;98(11):2473-82.
  78. Eisenberg P, MacKintosh FR, Ritch P, Cornett PA, Macciocchi A. Efficacy, safety and pharmacokinetics of palonosetron in patients receiving highly emetogenic cisplatin-based chemotherapy: a dose-ranging clinical study. *Ann Oncol*. 2004;15(2):330-7.
  79. Endo J, Iihara H, Yamada M, Yanase K, Kamiya F, Ito F, et al. A randomized controlled non-inferiority study comparing the antiemetic effect between intravenous granisetron and oral azasetron based on estimated 5-HT<sub>3</sub> receptor occupancy. *Anticancer Res*. 2012;32(9):3939-47.
  80. Fabi A, Ciccarese M, Metro G, Savarese A, Giannarelli D, Nuzzo CM, et al. Oral ondansetron is highly active as rescue antiemetic treatment for moderately emetogenic chemotherapy: results of a randomized phase II study. *Support Care Cancer*. 2008;16(12):1375-80.
  81. Falkson HC, Falkson CI, Falkson G. High versus low dose granisetron, a selective 5HT<sub>3</sub> antagonist, for the prevention of chemotherapy-induced nausea and vomiting. *Invest New Drugs*. 1990;8(4):407-9.
  82. Farley PA, Dempsey CL, Shillington AA, Kulis-Robitaille C, Colgan K, Bernstein G. Patients' self-reported functional status after granisetron or ondansetron therapy to prevent chemotherapy-induced nausea and vomiting at six cancer centers. *Am J Health Syst Pharm*. 1997;54(21):2478-82.
  83. Fauser AA, Bleiberg H, Chevallier B, Favre R, Fabbro M, Noble A, et al. A double-blind, randomized, parallel study of IV dolasetron mesilate versus IV metoclopramide in patients receiving moderately emetogenic chemotherapy. *The Cancer Journal*. 1996;9(4):196-202.
  84. Fauser AA, Duclos B, Chemaissani A, Del Favero A, Cognetti F, Diaz-Rubio E, et al. Therapeutic equivalence of single oral doses of dolasetron mesilate and multiple doses of ondansetron for the prevention of emesis after moderately emetogenic chemotherapy. *European Dolasetron Comparative Study Group. European journal of cancer*. 1996;32A(9):1523-9.
  85. Fauser AA, Pizzocaro G, Schueller J, Khayat D, Wilkinson P. A double-blind, randomised, parallel study comparing intravenous dolasetron plus dexamethasone and intravenous dolasetron alone for the management of fractionated cisplatin-related nausea and vomiting. *Support Care Cancer*. 2000;8(1):49-54.
  86. Fedele P, Spina M, Valentini M, Collini D, Lucia C, Manicone M, et al. Ondansetron versus granisetron in the prevention of chemotherapy-induced nausea and vomiting. *Cancer*. 1995;76(3):535-6.

87. Feng F, Zhang P, He Y, Li Y, Zhou M, Chen G, et al. Clinical comparison of the selective serotonin<sub>3</sub> antagonists ramosetron and granisetron in treating acute chemotherapy-induced emesis, nausea and anorexia. *Chin Med Sci J*. 2002;17(3):168-72.
88. Feng FY, Zhang P, He YJ, Li YH, Zhou MZ, Cheng G, et al. Oral formulations of the selective serotonin<sub>3</sub> antagonists ramosetron (intraoral disintegrator formulation) and granisetron hydrochloride (standard tablet) in treating acute chemotherapy-induced emesis, nausea, and anorexia: A multicenter, randomized, single-blind, crossover, comparison study. *Current therapeutic research, clinical and experimental*. 2002;63(11):725-35.
89. Forni C, Ferrari S, Loro L, Mazzei T, Beghelli C, Biolchini A, et al. Granisetron, tropisetron, and ondansetron in the prevention of acute emesis induced by a combination of cisplatin-Adriamycin and by high-dose ifosfamide delivered in multiple-day continuous infusions. *Support Care Cancer*. 2000;8(2):131-3.
90. Fox-Geiman MP, Fisher SG, Kiley K, Fletcher-Gonzalez D, Porter N, Stiff P. Double-blind comparative trial of oral ondansetron versus oral granisetron versus IV ondansetron in the prevention of nausea and vomiting associated with highly emetogenic preparative regimens prior to stem cell transplantation. *Biol Blood Marrow Transplant*. 2001;7(11):596-603.
91. Fraschini G, Ciociola A, Esparza L, Templeton D, Holmes FA, Walters RS, et al. Evaluation of three oral dosages of ondansetron in the prevention of nausea and emesis associated with cyclophosphamide-doxorubicin chemotherapy. *J Clin Oncol*. 1991;9(7):1268-74.
92. Friedman CJ, Burris HA, 3rd, Yocom K, Blackburn LM, Gruben D. Oral granisetron for the prevention of acute late onset nausea and vomiting in patients treated with moderately emetogenic chemotherapy. *Oncologist*. 2000;5(2):136-43.
93. Fujimoto TH, T.; Shimizu, H.; Oka, T.; Kikuta, A.; Mugishima, H.; Tonouchi, T.; Koizumi, S.; Takaue, Y.; Okamura, J. A controlled, dose- comparison study of granisetron for nausea and vomiting induced by cancer chemotherapy in children. . *Int J Clin Oncol*. 1996;1:57-60.
94. Fumoleau P, Giovannini M, Rolland F, Votan B, Paillarse JM. Ondansetron suppository: an effective treatment for the prevention of emetic disorders induced by cisplatin-based chemotherapy. French Ondansetron Study Group. *Oral Oncol*. 1997;33(5):354-8.
95. Gaedicke G, Ertmann R, Henze G, Hartmann W, Drechsler S, Grass P, et al. Pharmacokinetics of the 5HT<sub>3</sub> receptor antagonist tropisetron in children. *Pediatr Hematol Oncol*. 1996;13(5):405-16.
96. Gandara DR. Progress in the control of acute and delayed emesis induced by cisplatin. *Eur J Cancer*. 1991;27 Suppl 1:S9-11; discussion S22.
97. Gebbia V, Cannata G, Testa A, Curto G, Valenza R, Cipolla C, et al. Ondansetron versus granisetron in the prevention of chemotherapy-induced nausea and vomiting. Results of a prospective randomized trial. *Cancer*. 1994;74(7):1945-52.
98. Gebbia V, Testa A, Valenza R, Cannata G, Tirrito ML, Gebbia N. Oral granisetron with or without methylprednisolone versus metoclopramide plus methylprednisolone in the management of delayed nausea and vomiting induced by cisplatin-based chemotherapy. A prospective randomized trial. *Cancer*. 1995;76(10):1821-8.
99. Ghosh S, Dey S. Comparing different antiemetic regimens for chemotherapy induced nausea and vomiting. *International Journal of Collaborative Research on Internal Medicine and Public Health*. 2010;2(5):142-56.
100. Giralt SA, Mangan KF, Maziarz RT, Bubalo JS, Beveridge R, Hurd DD, et al. Three palonosetron regimens to prevent CINV in myeloma patients receiving multiple-day high-dose melphalan and hematopoietic stem cell transplantation. *Ann Oncol*. 2011;22(4):939-46.
101. Gralla R, Lichinitser M, Van Der Vegt S, Sleeboom H, Mezger J, Peschel C, et al. Palonosetron improves prevention of chemotherapy-induced nausea and vomiting following moderately emetogenic chemotherapy: results of a double-blind randomized phase III trial comparing single doses of palonosetron with ondansetron. *Ann Oncol*. 2003;14(10):1570-7.
102. Gralla RJ, Navari RM, Hesketh PJ, Popovic W, Strupp J, Noy J, et al. Single-dose oral granisetron has equivalent antiemetic efficacy to intravenous ondansetron for highly emetogenic cisplatin-based chemotherapy. *J Clin Oncol*. 1998;16(4):1568-73.
103. Gridelli C, Ianniello G, Ambrosini G, Mustacchi G, Pedicini T, Farris A, et al. A multicentre, double-blind, randomised trial comparing ondansetron versus ondansetron plus dexamethasone in the prophylaxis of cisplatin-induced delayed emesis. *Int J Oncol*. 1997;10(2):395-400.

104. Grote TH, Pineda LF, Figlin RA, Pendergrass KB, Hesketh PJ, Karlan BY, et al. Oral dolasetron mesylate in patients receiving moderately emetogenic platinum-containing chemotherapy. Oral Dolasetron Dose Response Study Group. *Cancer J Sci Am.* 1997;3(1):45-51.
105. Grunberg SM, Lane M, Lester EP, Sridhar KS, Mortimer J, Murphy W, et al. Randomized double-blind comparison of three dose levels of intravenous ondansetron in the prevention of cisplatin-induced emesis. *Cancer Chemother Pharmacol.* 1993;32(4):268-72.
106. Grunberg SM, Stevenson LL, Russell CA, McDermed JE. Dose ranging phase I study of the serotonin antagonist GR38032F for prevention of cisplatin-induced nausea and vomiting. *J Clin Oncol.* 1989;7(8):1137-41.
107. Hahlen K, Quintana E, Pinkerton CR, Cedar E. A randomized comparison of intravenously administered granisetron versus chlorpromazine plus dexamethasone in the prevention of ifosfamide-induced emesis in children. *J Pediatr.* 1995;126(2):309-13.
108. Hainsworth J, Harvey W, Pendergrass K, Kasimis B, Oblon D, Monaghan G, et al. A single-blind comparison of intravenous ondansetron, a selective serotonin antagonist, with intravenous metoclopramide in the prevention of nausea and vomiting associated with high-dose cisplatin chemotherapy. *J Clin Oncol.* 1991;9(5):721-8.
109. Hamadani M, Chaudhary L, Awan FT, Khan JK, Kojouri K, Ozer H, et al. Management of platinum-based chemotherapy-induced acute nausea and vomiting: is there a superior serotonin receptor antagonist? *J Oncol Pharm Pract.* 2007;13(2):69-75.
110. Handberg J, Wessel V, Larsen L, Herrstedt J, Hansen HH. Randomized, double-blind comparison of granisetron versus granisetron plus prednisolone as antiemetic prophylaxis during multiple-day cisplatin-based chemotherapy. *Support Care Cancer.* 1998;6(1):63-7.
111. Harris EM, Shillington AC, Dempsey CL, Blackwell B, A. FP. Benchmarking evaluation of 5-HT<sub>3</sub>-receptor antagonist use in emetogenic chemotherapy. *Formulary.* 1997;32(5):515-22.
112. Heron JF, Goedhals L, Jordaan JP, Cunningham J, Cedar E. Oral granisetron alone and in combination with dexamethasone: a double-blind randomized comparison against high-dose metoclopramide plus dexamethasone in prevention of cisplatin-induced emesis. The Granisetron Study Group. *Ann Oncol.* 1994;5(7):579-4.
113. Herrington JD, Kwan P, Young RR, Lagow E, Lagrone L, Riggs MW. Randomized, multicenter comparison of oral granisetron and oral ondansetron for emetogenic chemotherapy. *Pharmacotherapy.* 2000;20(11):1318-23.
114. Herrstedt J, Sigsgaard T, Boesgaard M, Jensen TP, Dombernowsky P. Ondansetron plus metopimazine compared with ondansetron alone in patients receiving moderately emetogenic chemotherapy. *N Engl J Med.* 1993;328(15):1076-80.
115. Herrstedt J, Sigsgaard TC, Nielsen HA, Handberg J, Langer SW, Ottesen S, et al. Randomized, double-blind trial comparing the antiemetic effect of tropisetron plus metopimazine with tropisetron plus placebo in patients receiving multiple cycles of multiple-day cisplatin-based chemotherapy. *Support Care Cancer.* 2007;15(4):417-26.
116. Hesketh P, Navari R, Grote T, Gralla R, Hainsworth J, Kris M, et al. Double-blind, randomized comparison of the antiemetic efficacy of intravenous dolasetron mesylate and intravenous ondansetron in the prevention of acute cisplatin-induced emesis in patients with cancer. Dolasetron Comparative Chemotherapy-induced Emesis Prevention Group. *J Clin Oncol.* 1996;14(8):2242-9.
117. Hesketh PJ, Beck T, Uhlenhopp M, Kris MG, Hainsworth JD, Harker WG, et al. Adjusting the dose of intravenous ondansetron plus dexamethasone to the emetogenic potential of the chemotherapy regimen. *J Clin Oncol.* 1995;13(8):2117-22.
118. Hesketh PJ, Crews JR, Cohen R, Blackburn LM, Friedman CJ. Antiemetic efficacy of single-dose oral granisetron (1 mg vs 2 mg) with moderately emetogenic chemotherapy. *Cancer J.* 2000;6(3):157-61.
119. Hesketh PJ, Gandara DR, Hesketh AM, Facada A, Perez EA, Webber LM, et al. Dose-ranging evaluation of the antiemetic efficacy of intravenous dolasetron in patients receiving chemotherapy with doxorubicin or cyclophosphamide. *Support Care Cancer.* 1996;4(2):141-6.
120. Hesketh PJ, Harvey WH, Harker WG, Beck TM, Ryan T, Bricker LJ, et al. A randomized, double-blind comparison of intravenous ondansetron alone and in combination with intravenous dexamethasone in the prevention of high-dose cisplatin-induced emesis. *J Clin Oncol.* 1994;12(3):596-600.
121. Ho CL, Su WC, Hsieh RK, Lin ZZ, Chao TY. A randomized, double-blind, parallel, comparative study to evaluate the efficacy and safety of ramosetron plus dexamethasone injection for the prevention of acute chemotherapy-induced nausea and vomiting. *Jpn J Clin Oncol.* 2010;40(4):294-301.



122. Hulstaert F, Van Belle S, Bleiberg H, Canon JL, Dewitte M, Buyse M, et al. Optimal combination therapy with tropisetron in 445 patients with incomplete control of chemotherapy-induced nausea and vomiting. *J Clin Oncol*. 1994;12(11):2439-46.
123. Hunter B, Aapro M, Pigué D, Giger K, Bauer J, Haefliger JM, et al. The antiemetic efficacy and safety of granisetron compared with metoclopramide plus dexamethasone in patients receiving fractionated chemotherapy over 5 days. The Granisetron Study Group. *J Cancer Res Clin Oncol*. 1993;119(9):555-9.
124. Ithimakin S, Runglodvatana K, Nimmannit A, Akewanlop C, Srimuninnimit V, Keerativitayanan N, et al. Randomized, double-blinded, placebo-controlled trial of ondansetron plus dexamethasone with or without metoclopramide as antiemetic prophylaxis in patients receiving high-dose cisplatin in medical practice. *Support Care Cancer*. 2012;20(4):849-55.
125. Jaing TH, Tsay PK, Hung IJ, Yang CP, Hu WY. Single-dose oral granisetron versus multidose intravenous ondansetron for moderately emetogenic cyclophosphamide-based chemotherapy in pediatric outpatients with acute lymphoblastic leukemia. *Pediatr Hematol Oncol*. 2004;21(3):227-35.
126. Jantunen IT, Kataja VV, Johansson RT. Ondansetron and tropisetron with dexamethasone in the prophylaxis of acute vomiting induced by non-cisplatin-containing chemotherapy. *Acta Oncol*. 1992;31(5):573-5.
127. Jantunen IT, Muhonen TT, Kataja VV, Flander MK, Teerenhovi L. 5-HT<sub>3</sub> receptor antagonists in the prophylaxis of acute vomiting induced by moderately emetogenic chemotherapy--a randomised study. *European journal of cancer*. 1993;29A(12):1669-72.
128. Jones AL, Hill AS, Soukop M, Hutcheon AW, Cassidy J, Kaye SB, et al. Comparison of dexamethasone and ondansetron in the prophylaxis of emesis induced by moderately emetogenic chemotherapy. *Lancet*. 1991;338(8765):483-7.
129. Joss RA, Bacchi M, Buser K, Kirchner V, Neuenschwander H, Orth B, et al. Ondansetron plus dexamethasone is superior to ondansetron alone in the prevention of emesis in chemotherapy-naive and previously treated patients. Swiss Group for Clinical Cancer Research (SAKK). *Ann Oncol*. 1994;5(3):253-8.
130. Kaasa S, Kvaloy S, Dicato MA, Ries F, Huys JV, Royer E, et al. A comparison of ondansetron with metoclopramide in the prophylaxis of chemotherapy-induced nausea and vomiting: a randomized, double-blind study. International Emesis Study Group. *European journal of cancer*. 1990;26(3):311-4.
131. Kaizer L, Warr D, Hoskins P, Latreille J, Lofters W, Yau J, et al. Effect of schedule and maintenance on the antiemetic efficacy of ondansetron combined with dexamethasone in acute and delayed nausea and emesis in patients receiving moderately emetogenic chemotherapy: a phase III trial by the National Cancer Institute of Canada Clinical Trials Group. *J Clin Oncol*. 1994;12(5):1050-7.
132. Kalaycio M, Mendez Z, Pohlman B, Overmoyer B, Boparai N, Jones E, et al. Continuous-infusion granisetron compared to ondansetron for the prevention of nausea and vomiting after high-dose chemotherapy. *J Cancer Res Clin Oncol*. 1998;124(5):265-9.
133. Kandemir EG, Yaylaci M, Uskent N. Comparison of ondansetron plus dexamethasone with metoclopramide plus dexamethasone in the control of cisplatin-induced delayed emesis. *The Official Journal of Balkan Union of Oncology*. 1999;4(3):289-93.
134. Kang YK, Park YH, Ryoo BY, Bang YJ, Cho KS, Shin DB, et al. Ramosetron for the prevention of cisplatin-induced acute emesis: a prospective randomized comparison with granisetron. *J Int Med Res*. 2002;30(3):220-9.
135. Kasimis BS, Tapazoglou E, Schulman P, Stewart WH, Hahne WF, Cramer MB. A double-blind, randomized study of two different dosage regimens of intravenous dolasetron in patients receiving high-dose cisplatin chemotherapy. *Cancer Invest*. 1997;15(4):304-10.
136. Kaushal J, Gupta MC, Kaushal V, Bhutani G, Dhankar R, Atri R, et al. Clinical evaluation of two antiemetic combinations palonosetron dexamethasone versus ondansetron dexamethasone in chemotherapy of head and neck cancer. *Singapore Med J*. 2010;51(11):871-5.
137. Keyhanian S, Taziki O, Saravi MM, Fotokian Z. A randomized comparison of granisetron plus dexamethasone with granisetron alone for the control of acute chemotherapy-induced emesis and nausea. *International Journal of Hematology-Oncology and Stem Cell Research*. 2009;3(2):27-30.
138. Khojasteh A, Sartiano G, Tapazoglou E, Lester E, Gandara D, Bernard S, et al. Ondansetron for the prevention of emesis induced by high-dose cisplatin. A multi-center dose-response study. *Cancer*. 1990;66(6):1101-5.

139. Kigawa J, Minagawa Y, Itamochi H, Cheng X, Okada M, Terakawa N. Combination effect of granisetron and methylprednisolone for preventing emesis induced by cytotoxic agents. *Gynecol Obstet Invest.* 1997;43(3):195-9.
140. Kim JS, Baek JY, Park SR, Choi IS, Kim SI, Kim DW, et al. Open-label, randomized comparison of the efficacy of intravenous dolasetron mesylate and ondansetron in the prevention of acute and delayed cisplatin-induced emesis in cancer patients. *Cancer Res Treat.* 2004;36(6):372-6.
141. Kleisbauer JP, Garcia-Giron C, Antimi M, Azevedo MC, Balmes H, Massuti-Sureda B, et al. Granisetron plus methylprednisolone for the control of high-dose cisplatin-induced emesis. *Anticancer Drugs.* 1998;9(5):387-92.
142. Koenig HJ, Drechsler S, Kohnen R, Faerber L. Acceptance and Tolerability of Tropisetron and Metoclopramide in Outpatients – a Randomized Crossover Study. *Onkologie.* 2000;23(3):258-61.
143. Koizumi W, Tanabe S, Nagaba S, Higuchi K, Nakayama N, Saigenji K, et al. A double-blind, crossover, randomized comparison of granisetron and ramosetron for the prevention of acute and delayed cisplatin-induced emesis in patients with gastrointestinal cancer: is patient preference a better primary endpoint? *Chemotherapy.* 2003;49(6):316-23.
144. Komada Y, Matsuyama T, Takao A, Hongo T, Nishimura Y, Horibe K, et al. A randomised dose-comparison trial of granisetron in preventing emesis in children with leukaemia receiving emetogenic chemotherapy. *European journal of cancer.* 1999;35(7):1095-101.
145. Koralewski P, Karczmarek-Borowska B, Cegielski W, Nawara I, Urbanska-Gasiorowska M. Effectiveness of oral ondansetron in the management of nausea and vomiting induced by moderately emetogenic chemotherapy. *Nowotwory.* 2001;51(6):579-83.
146. Kris MG, Gralla RJ, Clark RA, Tyson LB. Dose-ranging evaluation of the serotonin antagonist GR-C507/75 (GR38032F) when used as an antiemetic in patients receiving anticancer chemotherapy. *J Clin Oncol.* 1988;6(4):659-62.
147. Kris MG, Grunberg SM, Gralla RJ, Baltzer L, Zaretsky SA, Lifsey D, et al. Dose-ranging evaluation of the serotonin antagonist dolasetron mesylate in patients receiving high-dose cisplatin. *J Clin Oncol.* 1994;12(5):1045-9.
148. Kris MG, Pendergrass KB, Navari RM, Grote TH, Nelson AM, Thomas V, et al. Prevention of acute emesis in cancer patients following high-dose cisplatin with the combination of oral dolasetron and dexamethasone. *J Clin Oncol.* 1997;15(5):2135-8.
149. Krzakowski M, Graham E, Goedhals L, Joly F, Pawlicki M, Rapoport B, et al. A multicenter, double-blind comparison of i.v. and oral administration of ondansetron plus dexamethasone for acute cisplatin-induced emesis. Ondansetron Acute Emesis Study Group. *Anticancer Drugs.* 1998;9(7):593-8.
150. Kurnianda J, Hisyam B, Wahyuningsih E, Hutajulu SH. The efficacy of granisetron for cancer patients undergoing platinum-based chemotherapy: comparison of 1 miligram versus 3 miligram doses in preventing nausea and vomiting. *Acta Med Indones.* 2005;37(4):210-3.
151. Labar B, Mrsic M, Nemet D, Francetic I, Bogdanic V, Radman I, et al. Ondansetron for prophylaxis of nausea and vomiting after bone marrow transplantation. *Libri Oncologici (Croatina Journal of Oncology).* 1995;24(3):131-5.
152. Latreille J, Pater J, Johnston D, Laberge F, Stewart D, Rusthoven J, et al. Use of dexamethasone and granisetron in the control of delayed emesis for patients who receive highly emetogenic chemotherapy. National Cancer Institute of Canada Clinical Trials Group. *J Clin Oncol.* 1998;16(3):1174-8.
153. Latreille J, Stewart D, Laberge F, Hoskins P, Rusthoven J, McMurtrie E, et al. Dexamethasone improves the efficacy of granisetron in the first 24 h following high-dose cisplatin chemotherapy. *Support Care Cancer.* 1995;3(5):307-12.
154. Lazarus HM, O'Riordan MA, Creger RJ, Myers CM, Blumer JL, Reed MD. Pharmacokinetics, tolerability and efficacy of bolus-dose vs continuous-infusion granisetron in the prevention of vomiting in patients undergoing haematopoietic stem-cell transplantation: A randomised, double-blind evaluation. *Clinical Drug Investigation.* 1999;17(2):155-65.
155. Lemerle J, Amaral D, Southall DP, Upward J, Murdoch RD. Efficacy and safety of granisetron in the prevention of chemotherapy-induced emesis in paediatric patients. *European journal of cancer.* 1991;27(9):1081-3.
156. Leonardi V, Iannito E, Meli M, Palmeri S. Ondansetron (OND) vs granisetron (GRA) in the control of chemotherapy induced acute emesis. *Oncol Rep.* 1996;3(5):919-23.

157. Levitt M, Warr D, Yelle L, Rayner HL, Lofters WS, Perrault DJ, et al. Ondansetron compared with dexamethasone and metoclopramide as antiemetics in the chemotherapy of breast cancer with cyclophosphamide, methotrexate, and fluorouracil. *N Engl J Med*. 1993;328(15):1081-4.
158. Liaw CC, Wang CH, Chang HK, Liao CT, Yeh KY, Huang JS, et al. Gender discrepancy observed between chemotherapy-induced emesis and hiccups. *Support Care Cancer*. 2001;9(6):435-41.
159. Lim AK, Haron MR, Yap TM. Ondansetron against metoclopramide/dexamethasone--a comparative study. *Med J Malaysia*. 1994;49(3):231-8.
160. Lindley C, Goodin S, McCune J, Kane M, Amamoo MA, Shord S, et al. Prevention of delayed chemotherapy-induced nausea and vomiting after moderately high to highly emetogenic chemotherapy: comparison of ondansetron, prochlorperazine, and dexamethasone. *Am J Clin Oncol*. 2005;28(3):270-6.
161. Lofters WS, Pater JL, Zee B, Dempsey E, Walde D, Moquin JP, et al. Phase III double-blind comparison of dolasetron mesylate and ondansetron and an evaluation of the additive role of dexamethasone in the prevention of acute and delayed nausea and vomiting due to moderately emetogenic chemotherapy. *J Clin Oncol*. 1997;15(8):2966-73.
162. Madej G, Krzakowski M, Pawiriski A, Lasota W, Rogowski W, Skoneczna I. A Comparative Study of the Use of Navoban (ICS 205-930), a 5-HT<sub>3</sub> Antagonist, versus a Standard Antiemetic Regimen of Dexamethasone and Metoclopramide in the Treatment of Cisplatin-Containing Chemotherapy. *Drug Investigation*. 1993;6(3):162-9.
163. Maemondo M, Masuda N, Sekine I, Kubota K, Segawa Y, Shibuya M, et al. A phase II study of palonosetron combined with dexamethasone to prevent nausea and vomiting induced by highly emetogenic chemotherapy. *Ann Oncol*. 2009;20(11):1860-6.
164. Mandanas RA, Beveridge R, Rifkin RM, Wallace H, Greenspan A, Asmar L. A randomized, multicenter, open-label comparison of the antiemetic efficacy of dolasetron versus ondansetron for the prevention of nausea and vomiting during high-dose myeloablative chemotherapy. *Support Cancer Ther*. 2005;2(2):114-21.
165. Mantovani G, Maccio A, Bianchi A, Curreli L, Ghiani M, Proto E, et al. Comparison of granisetron, ondansetron, and tropisetron in the prophylaxis of acute nausea and vomiting induced by cisplatin for the treatment of head and neck cancer: a randomized controlled trial. *Cancer*. 1996;77(5):941-8.
166. Marschner NW, Adler M, Nagel GA, Christmann D, Fenzl E, Upadhyaya B. Double-blind randomised trial of the antiemetic efficacy and safety of ondansetron and metoclopramide in advanced breast cancer patients treated with epirubicin and cyclophosphamide. *European journal of cancer*. 1991;27(9):1137-40.
167. Martoni A, Angelelli B, Guaraldi M, Strocchi E, Pannuti F. An open randomised cross-over study on granisetron versus ondansetron in the prevention of acute emesis induced by moderate dose cisplatin-containing regimens. *European journal of cancer*. 1996;32A(1):82-5.
168. Marty M. A comparative study of the use of granisetron, a selective 5-HT<sub>3</sub> antagonist, versus a standard anti-emetic regimen of chlorpromazine plus dexamethasone in the treatment of cytostatic-induced emesis. The Granisetron Study Group. *European journal of cancer*. 1990;26 Suppl 1:S28-32.
169. Marty M, Kleisbauer JP, Fournel P, Vergnenegre A, Carles P, Loria-Kanza Y, et al. Is Navoban (tropisetron) as effective as Zofran (ondansetron) in cisplatin-induced emesis? The French Navoban Study Group. *Anticancer Drugs*. 1995;6 Suppl 1:15-21.
170. Marty M, Pouillart P, Scholl S, Droz JP, Azab M, Brion N, et al. Comparison of the 5-hydroxytryptamine<sub>3</sub> (serotonin) antagonist ondansetron (GR 38032F) with high-dose metoclopramide in the control of cisplatin-induced emesis. *N Engl J Med*. 1990;322(12):816-21.
171. Massidda B, Ionta MT. Prevention of delayed emesis by a single intravenous bolus dose of 5-HT<sub>3</sub>-receptor-antagonist in moderately emetogenic chemotherapy. *J Chemother*. 1996;8(3):237-42.
172. Matsui K, Fukuoka M, Takada M, Kusunoki Y, Yana T, Tamura K, et al. Randomised trial for the prevention of delayed emesis in patients receiving high-dose cisplatin. *Br J Cancer*. 1996;73(2):217-21.
173. Matsuoka S, Okamoto S, Watanabe R, Mori T, Nagayama H, Hamano Y, et al. Granisetron plus dexamethasone versus granisetron alone in the prevention of vomiting induced by conditioning for stem cell transplantation: a prospective randomized study. *Int J Hematol*. 2003;77(1):86-90.
174. Mattiuzzi GN, Cortes JE, Blamble DA, Bekele BN, Xiao L, Cabanillas M, et al. Daily palonosetron is superior to ondansetron in the prevention of delayed chemotherapy-induced nausea and vomiting in patients with acute myelogenous leukemia. *Cancer*. 2010;116(24):5659-66.

175. Merrouche Y, Catimel G, Rebattu P, Dumortier A, Guastalla JP, O'Grady P, et al. A phase I antiemetic study of MDL 73,147EF, a novel 5-hydroxytryptamine antagonist in cancer patients receiving emetogenic chemotherapy. *Ann Oncol.* 1994;5(6):549-51.
176. Mustacchi G, Ceccherini R, Leita ML, Sandri P, Milani S, Carbonara T. The combination of metoclopramide, methylprednisolone and ondansetron against antineoplastic-delayed emesis: a randomised phase II study. *Anticancer Res.* 1997;17(2B):1345-8.
177. Nagel K, Willan AR, Lappan J, Korz L, Buckley N, Barr RD. Pediatric oncology sedation trial (POST): A double-blind randomized study. *Pediatric Blood and Cancer.* 2008;51(5):634-8.
178. Navari R, Gandara D, Hesketh P, Hall S, Mailliard J, Ritter H, et al. Comparative clinical trial of granisetron and ondansetron in the prophylaxis of cisplatin-induced emesis. The Granisetron Study Group. *J Clin Oncol.* 1995;13(5):1242-8.
179. Navari RM, Kaplan HG, Gralla RJ, Grunberg SM, Palmer R, Fitts D. Efficacy and safety of granisetron, a selective 5-hydroxytryptamine-3 receptor antagonist, in the prevention of nausea and vomiting induced by high-dose cisplatin. *J Clin Oncol.* 1994;12(10):2204-10.
180. Navari RM, Madajewicz S, Anderson N, Tchekmedyan NS, Whaley W, Garewal H, et al. Oral ondansetron for the control of cisplatin-induced delayed emesis: a large, multicenter, double-blind, randomized comparative trial of ondansetron versus placebo. *J Clin Oncol.* 1995;13(9):2408-16.
181. Needles B, Miranda E, Garcia Rodriguez FM, Diaz LB, Spector J, Craig J, et al. A multicenter, double-blind, randomized comparison of oral ondansetron 8 mg b.i.d., 24 mg q.d., and 32 mg q.d. in the prevention of nausea and vomiting associated with highly emetogenic chemotherapy. S3AA3012 Study Group. *Support Care Cancer.* 1999;7(5):347-53.
182. Noble A, Bremer K, Goedhals L, Cupissol D, Dilly SG. A double-blind, randomised, crossover comparison of granisetron and ondansetron in 5-day fractionated chemotherapy: assessment of efficacy, safety and patient preference. The Granisetron Study Group. *European journal of cancer.* 1994;30A(8):1083-8.
183. Noda K, Ikeda M, Taguchi T, Kanamaru R, Ichijyo M, Okada K, et al. Clinical assessment of ramosetron HCl oral preparation in the treatment of nausea and vomiting induced by cisplatin: A multicenter, randomized, parallel-design, double-blind comparative study with ondansetron HCl. *Current therapeutic research, clinical and experimental.* 2002;63(10):636-48.
184. Noda K, Ikeda M, Yoshida O, Yano S, Taguchi T, Shimoyama T, et al. Clinical evaluation of Ramosetron injections in the treatment of cisplatin-induced nausea and vomiting. *J Int Med Res.* 2002;30(3):211-9.
185. Noor R, Bedikian AY, Mahoney S, Bassett R, Jr., Kim K, Papadopoulos N, et al. Comparison of two dosing schedules of palonosetron for the prevention of nausea and vomiting due to interleukin-2-based biochemotherapy. *Support Care Cancer.* 2012;20(10):2583-8.
186. Oge A, Alkis N, Oge O, Kartum A. Comparison of granisetron, ondansetron and tropisetron for control of vomiting and nausea induced by cisplatin. *J Chemother.* 2000;12(1):105-8.
187. Olver I, Paska W, Depierre A, Seitz JF, Stewart DJ, Goedhals L, et al. A multicentre, double-blind study comparing placebo, ondansetron and ondansetron plus dexamethasone for the control of cisplatin-induced delayed emesis. Ondansetron Delayed Emesis Study Group. *Ann Oncol.* 1996;7(9):945-52.
188. Orchard PJ, Rogosheske J, Burns L, Rydholm N, Larson H, DeFor TE, et al. A prospective randomized trial of the anti-emetic efficacy of ondansetron and granisetron during bone marrow transplantation. *Biol Blood Marrow Transplant.* 1999;5(6):386-93.
189. Ozgur Tan M, Sandikci Z, Uygur MC, Arik AI, Erol D. Combination of transcutaneous electrical nerve stimulation and ondansetron in preventing cisplatin-induced emesis. *Urol Int.* 2001;67(1):54-8.
190. Park JO, Rha SY, Yoo NC, Kim JH, Roh JK, Min JS, et al. A comparative study of intravenous granisetron versus intravenous and oral ondansetron in the prevention of nausea and vomiting associated with moderately emetogenic chemotherapy. *Am J Clin Oncol.* 1997;20(6):569-72.
191. Parker RI, Prakash D, Mahan RA, Giugliano DM, Atlas MP. Randomized, double-blind, crossover, placebo-controlled trial of intravenous ondansetron for the prevention of intrathecal chemotherapy-induced vomiting in children. *J Pediatr Hematol Oncol.* 2001;23(9):578-81.
192. Pectasides D, Dafni U, Aravantinos G, Timotheadou E, Skarlos DV, Pavlidis N, et al. A randomized trial to compare the efficacy and safety of antiemetic treatment with ondansetron and ondansetron zydys in patients with breast cancer treated with high-dose epirubicin. *Anticancer Res.* 2007;27(6C):4411-7.

193. Pectasides D, Mylonakis A, Varthalitis J, Kostopoulou M, Constantinou A, Papazachariou K, et al. Comparison of two different doses of ondansetron plus dexamethasone in the prophylaxis of cisplatin-induced emesis. *Oncology*. 1997;54(1):1-6.
194. Perez EA, Hesketh P, Sandbach J, Reeves J, Chawla S, Markman M, et al. Comparison of single-dose oral granisetron versus intravenous ondansetron in the prevention of nausea and vomiting induced by moderately emetogenic chemotherapy: a multicenter, double-blind, randomized parallel study. *J Clin Oncol*. 1998;16(2):754-60.
195. Perez EA, Lembersky B, Kaywin P, Kalman L, Yocom K, Friedman C. Comparable safety and antiemetic efficacy of a brief (30-second bolus) intravenous granisetron infusion and a standard (15-minute) intravenous ondansetron infusion in breast cancer patients receiving moderately emetogenic chemotherapy. *Cancer J Sci Am*. 1998;4(1):52-8.
196. Perez EA, Navari RM, Kaplan HG, Gralla RJ, Grunberg SM, Palmer RH, et al. Efficacy and safety of different doses of granisetron for the prophylaxis of cisplatin-induced emesis. *Support Care Cancer*. 1997;5(1):31-7.
197. Peterson C, Hursti TJ, Borjeson S, Avall-Lundqvist E, Fredrikson M, Furst CJ, et al. Single high-dose dexamethasone improves the effect of ondansetron on acute chemotherapy-induced nausea and vomiting but impairs the control of delayed symptoms. *Support Care Cancer*. 1996;4(6):440-6.
198. Pielichowski W, Gawronski K, Mlot B, Oborska S, Wasko-Grabowska A, Rzepecki P. Triple drug combination in the prevention of nausea and vomiting following busulfan plus cyclophosphamide chemotherapy before allogeneic hematopoietic stem cell transplantation. *Journal of BUON*. 2011;16(3):541-6.
199. Pinarli FG, Elli M, Dagdemir A, Baysal K, Acar S. Electrocardiographic findings after 5-HT<sub>3</sub> receptor antagonists and chemotherapy in children with cancer. *Pediatric Blood and Cancer*. 2006;47(5):567-71.
200. Pisters KM, Kris MG, Tyson LB, Clark RA, Gralla RJ. Dose-ranging antiemetic evaluation of the serotonin antagonist tropisetron in patients receiving anti-cancer chemotherapy. *Cancer*. 1993;71(1):226-30.
201. Poon RT, Chow LW. Comparison of antiemetic efficacy of granisetron and ondansetron in Oriental patients: a randomized crossover study. *Br J Cancer*. 1998;77(10):1683-5.
202. Rath U, Upadhyaya BK, Arechavala E, Bockmann H, Dearnaley D, Droz JP, et al. Role of ondansetron plus dexamethasone in fractionated chemotherapy. *Oncology*. 1993;50(3):168-72.
203. Raynov J, Danon S, Valerianova Z. Control of acute emesis in repeated courses of moderately emetogenic chemotherapy. *J BUON*. 2002;7(1):57-60.
204. Raynov J, Raynova P, Kancheva T, Georgiev G. Antiemetic control in cancer patients treated with highly emetogenic chemotherapy. *Journal of B U ON*. 2000;5(3):287-91.
205. Raynov J, Stanchev R, Radinov A, Popova T, Damjanov I. Efficacy of different doses of ondansetron in cancer patients treated with cisplatin-containing chemotherapy. *Archive of Oncology*. 1999;7(4):149-51.
206. Research TIGfA. Dexamethasone, granisetron, or both for the prevention of nausea and vomiting during chemotherapy for cancer. The Italian Group for Antiemetic Research. *N Engl J Med*. 1995;332(1):1-5.
207. Ribiero M, de Faria L, dos Reis F, Fráguas A, de Matos E, Uva S, et al. Ondansetron in the treatment of nausea and vomiting induced by chemotherapy. *Anti-Cancer Drugs*. 1993;4(3):23-7.
208. Ritter HL, Jr., Gralla RJ, Hall SW, Wada JK, Friedman C, Hand L, et al. Efficacy of intravenous granisetron to control nausea and vomiting during multiple cycles of cisplatin-based chemotherapy. *Cancer Invest*. 1998;16(2):87-93.
209. Riviere A. Dose finding study of granisetron in patients receiving high-dose cisplatin chemotherapy. The Granisetron Study Group. *Br J Cancer*. 1994;69(5):967-71.
210. Roila EB, E.; Ruggeri, B.; Angelis, V.; Tonato, M.; Bosnjak, S.; Favero, A.; Ciccicarese, G.; Basurto, C.; Ciccicarese, G.; Palladino, M. A.; Porrozzi, S.; Marinkovic, Z.; Neskovic-Konstantinovic, Z.; Susnjar, S.; Vasovic, S.; Colakovic, S.; Lukic, V.; Radosavljevic, D.; Fava, S.; Grimi, E.; Calcagno, A.; Paoli, A.; Luoni, M.; Tocci, A.; Nuzzo, A.; Laudadio, L.; Blasio, A.; Sacco, M.; Contu, A.; Olmeo, N.; Pazzola, A.; Baldino, G.; Picece, V.; Nicodemo, M.; Cirillo, M.; Recaldin, E.; Daz. Dexamethasone alone or in combination with ondansetron for the prevention of delayed nausea and vomiting induced by chemotherapy. The Italian Group for Antiemetic Research. *N Engl J Med*. 2000;342(21):1554-9.

211. Roila F. Ondansetron versus metoclopramide, both combined with dexamethasone, in the prevention of cisplatin-induced delayed emesis. The Italian Group for Antiemetic Research. *J Clin Oncol*. 1997;15(1):124-30.
212. Roila F, Tonato M, Cognetti F, Cortesi E, Favalli G, Marangolo M, et al. Prevention of cisplatin-induced emesis: a double-blind multicenter randomized crossover study comparing ondansetron and ondansetron plus dexamethasone. *J Clin Oncol*. 1991;9(4):675-8.
213. Roscoe JA, Heckler CE, Morrow GR, Mohile SG, Dakhil SR, Wade JL, et al. Prevention of delayed nausea: a University of Rochester Cancer Center Community Clinical Oncology Program study of patients receiving chemotherapy. *J Clin Oncol*. 2012;30(27):3389-95.
214. Rubenstein EB, Gralla RJ, Hainsworth JD, Hesketh PJ, Grote TH, Modiano MR, et al. Randomized, double blind, dose-response trial across four oral doses of dolasetron for the prevention of acute emesis after moderately emetogenic chemotherapy. Oral Dolasetron Dose-Response Study Group. *Cancer*. 1997;79(6):1216-24.
215. Ruff P, Paska W, Goedhals L, Pouillart P, Riviere A, Vorobiof D, et al. Ondansetron compared with granisetron in the prophylaxis of cisplatin-induced acute emesis: a multicentre double-blind, randomised, parallel-group study. The Ondansetron and Granisetron Emesis Study Group. *Oncology*. 1994;51(1):113-8.
216. Rzepecki P, Pielichowski W, Oborska S, Barzal J, Mlot B. Palonosetron in prevention of nausea and vomiting after highly emetogenic chemotherapy before haematopoietic stem cell transplantation-single center experience. *Transplant Proc*. 2009;41(8):3247-9.
217. Sagae S, Ishioka S, Fukunaka N, Terasawa K, Kobayashi K, Sugimura M, et al. Combination therapy with granisetron, methylprednisolone and droperidol as an antiemetic prophylaxis in CDDP-induced delayed emesis for gynecologic cancer. *Oncology*. 2003;64(1):46-53.
218. Saito M, Aogi K, Sekine I, Yoshizawa H, Yanagita Y, Sakai H, et al. Palonosetron plus dexamethasone versus granisetron plus dexamethasone for prevention of nausea and vomiting during chemotherapy: a double-blind, double-dummy, randomised, comparative phase III trial. *Lancet Oncol*. 2009;10(2):115-24.
219. Sandoval C, Corbi D, Strobino B, Fevzi Ozkaynak M, Tugal O, Jayabose S. Randomized double-blind comparison of single high-dose ondansetron and multiple standard-dose ondansetron in chemotherapy-naïve pediatric oncology patients. *Cancer Invest*. 1999;17(5):309-13.
220. Scoponi CAT, U.; Di Giuseppe, M.; Giustozzi, M. Are 5-HT<sub>3</sub> antagonists a standard antiemetic treatment also in slightly and moderately emetogenic regimens? *Oncologia*. 1998;21(9):40-4.
221. Segawa Y, Aogi K, Inoue K, Sano M, Sekine I, Tokuda Y, et al. A phase II dose-ranging study of palonosetron in Japanese patients receiving moderately emetogenic chemotherapy, including anthracycline and cyclophosphamide-based chemotherapy. *Ann Oncol*. 2009;20(11):1874-80.
222. Sepulveda-Vildosola AC, Betanzos-Cabrera Y, Lastiri GG, Rivera-Marquez H, Villasis-Keever MA, Del Angel VW, et al. Palonosetron hydrochloride is an effective and safe option to prevent chemotherapy-induced nausea and vomiting in children. *Arch Med Res*. 2008;39(6):601-6.
223. Seynaeve C, de Mulder PH, Lane-Allman E, van Liessum PA, Verweij J. The 5-HT<sub>3</sub> receptor antagonist ondansetron re-establishes control in refractory emesis induced by non-cisplatin chemotherapy. *Clin Oncol (R Coll Radiol)*. 1991;3(4):199-203.
224. Seynaeve C, Schuller J, Buser K, Porteder H, Van Belle S, Sevelde P, et al. Comparison of the anti-emetic efficacy of different doses of ondansetron, given as either a continuous infusion or a single intravenous dose, in acute cisplatin-induced emesis. A multicentre, double-blind, randomised, parallel group study. Ondansetron Study Group. *Br J Cancer*. 1992;66(1):192-7.
225. Shi Y, He X, Yang S, Ai B, Zhang C, Huang D, et al. Ramosetron versus ondansetron in the prevention of chemotherapy-induced gastrointestinal side effects: A prospective randomized controlled study. *Chemotherapy*. 2007;53(1):44-50.
226. Shikimori M, Komatsu H, Hashimoto K, Yamashita Y. Granisetron reduces clinical and histological response to intra-arterial neoadjuvant chemotherapy in oral squamous cell carcinoma. *Int J Oral Maxillofac Surg*. 2006;35(9):800-2.
227. Siddique R, Hafiz MG, Rokeya B, Jamal CY, Islam A. Ondansetron versus granisetron in the prevention of chemotherapy induced nausea and vomiting in children with acute lymphoblastic leukemia. *Mymensingh Med J*. 2011;20(4):680-8.

228. Sigsgaard T, Herrstedt J, Andersen LJ, Havsteen H, Langer SW, Kjaerbol AG, et al. Granisetron compared with prednisolone plus metopimazine as anti-emetic prophylaxis during multiple cycles of moderately emetogenic chemotherapy. *Br J Cancer*. 1999;80(3-4):412-8.
229. Slaby J, Trneny M, Prochazka B, Klener P. Antiemetic efficacy of three serotonin antagonists during high-dose chemotherapy and autologous stem cell transplantation in malignant lymphoma. *Neoplasma*. 2000;47(5):319-22.
230. Sledge GW, Jr., Einhorn L, Nagy C, House K. Phase III double-blind comparison of intravenous ondansetron and metoclopramide as antiemetic therapy for patients receiving multiple-day cisplatin-based chemotherapy. *Cancer*. 1992;70(10):2524-8.
231. Smith DB, Newlands ES, Rustin GJ, Begent RH, Howells N, McQuade B, et al. Comparison of ondansetron and ondansetron plus dexamethasone as antiemetic prophylaxis during cisplatin-containing chemotherapy. *Lancet*. 1991;338(8765):487-90.
232. Smith IE. A dose-finding study of granisetron, a novel antiemetic, in patients receiving cytostatic chemotherapy. The Granisetron Study Group. *J Cancer Res Clin Oncol*. 1993;119(6):350-4.
233. Smyth JF, Coleman RE, Nicolson M, Gallmeier WM, Leonard RC, Cornbleet MA, et al. Does dexamethasone enhance control of acute cisplatin induced emesis by ondansetron? *BMJ*. 1991;303(6815):1423-6.
234. Sorbe B, Hogberg T, Himmelmann A, Schmidt M, Raisanen I, Stockmeyer M, et al. Efficacy and tolerability of tropisetron in comparison with a combination of tropisetron and dexamethasone in the control of nausea and vomiting induced by cisplatin-containing chemotherapy. *European journal of cancer*. 1994;30A(5):629-34.
235. Sorbe BG, Berglind AM, Andersson H, Boman K, Hogberg T, Hallgren M, et al. A study evaluating the efficacy and tolerability of tropisetron in combination with dexamethasone in the prevention of delayed platinum-induced nausea and emesis. *Cancer*. 1998;83(5):1022-32.
236. Soukop M, McQuade B, Hunter E, Stewart A, Kaye S, Cassidy J, et al. Ondansetron compared with metoclopramide in the control of emesis and quality of life during repeated chemotherapy for breast cancer. *Oncology*. 1992;49(4):295-304.
237. Spector JJ, Lester EP, Chevlen EM, Sciortino D, Harvey JH, Whaley W, et al. A Comparison of Oral Ondansetron and Intravenous Granisetron for the Prevention of Nausea and Emesis Associated with Cisplatin-Based Chemotherapy. *Oncologist*. 1998;3(6):432-8.
238. Steiner MA, Yorgason RZ, Vermeulen LC, Theisen J. Patient outcomes after therapeutic interchange of dolasetron for granisetron. *Am J Health Syst Pharm*. 2003;60(10):1023-8.
239. Stewart A, McQuade B, Cronje JD, Goedhals L, Gudgeon A, Corette L, et al. Ondansetron compared with granisetron in the prophylaxis of cyclophosphamide-induced emesis in out-patients: a multicentre, double-blind, double-dummy, randomised, parallel-group study. Emesis Study Group for Ondansetron and Granisetron in Breast Cancer Patients. *Oncology*. 1995;52(3):202-10.
240. Stewart L, Crawford SM, Taylor PA. The comparative effectiveness of ondansetron and granisetron in a once daily dosage in the prevention of nausea and vomiting caused by cisplatin: A double-blind clinical trial. *Pharmaceutical Journal*. 2000;265(7104):59-62.
241. Stiakaki E, Savvas S, Lydaki E, Bolonaki I, Kouvidi E, Dimitriou H, et al. Ondansetron and tropisetron in the control of nausea and vomiting in children receiving combined cancer chemotherapy. *Pediatr Hematol Oncol*. 1999;16(2):101-8.
242. Suarez A, Stettler ER, Rey E, Pons G, Simonetta-Chateaufneuf C, de Bruijn KM, et al. Safety, tolerability, efficacy and plasma concentrations of tropisetron after administration at five dose levels to children receiving cancer chemotherapy. *European journal of cancer*. 1994;30A(10):1436-41.
243. Taguchi K, Iihara H, Ishihara M, Komori Y, Tanizawa K, Matsuura K, et al. Comparison of antiemetic efficacy between single and repeated treatments with a 5-HT<sub>3</sub> receptor antagonist in breast cancer patients with high-risk emetogenic chemotherapy. *Anticancer Res*. 2009;29(5):1721-5.
244. Tan M, Xu R, Seth R. Granisetron vs dolasetron for acute chemotherapy-induced nausea and vomiting (CINV) in high and moderately high emetogenic chemotherapy: an open-label pilot study. *Curr Med Res Opin*. 2004;20(6):879-82.
245. Tantipalakorn C, Srisomboon J, Thienthong H, Pantusart A, Suprasert P, Saereesongkhun C, et al. Comparison of oral versus intravenous ramosetron in prevention of acute cisplatin-induced emesis: a randomized controlled trial. *J Med Assoc Thai*. 2004;87(2):119-25.
246. Tatsumi N, Masaoka T. A comparative study of administration methods of granisetron injection used to treat nausea/vomiting induced by cancer chemotherapy without cisplatin in tumors of hematopoietic

- organs. Keihanshin Study Group of Hematological Malignancies. *Cancer Chemother Pharmacol*. 1999;43(5):379-84.
247. Tian W, Wang Z, Zhou J, Zhang S, Wang J, Chen Q, et al. Randomized, double-blind, crossover study of palonosetron compared with granisetron for the prevention of chemotherapy-induced nausea and vomiting in a Chinese population. *Med Oncol*. 2011;28(1):71-8.
248. Tsavaris N, Charalambidis G, Ganas N, Pagou M, Karabellis A, Mylonakis N, et al. Ondansetron versus metoclopramide as antiemetic treatment during cisplatin-based chemotherapy. A prospective study with special regard to regard to electrolyte imbalance. *Acta Oncol*. 1995;34(2):243-6.
249. Tsavaris N, Fountzilas G, Mylonakis N, Athanassiadis A, Kosmas C, Karakousis C, et al. A randomized comparative study of antiemetic prophylaxis with ondansetron in a single 32-mg loading dose versus 8 mg every 6 h in patients undergoing cisplatin-based chemotherapy. *Oncology*. 1998;55(6):513-6.
250. Tsavaris N, Kosmas C, Vadiaka M, Kanelopoulos P, Kontos A, Katsorida M, et al. Ondansetron and dexamethasone treatment with different dosing schedules (24 versus 32 mg) in patients with non-small-cell lung cancer under cisplatin-based chemotherapy: a randomized study. *Chemotherapy*. 2000;46(5):364-70.
251. Tsavaris N, Kosmas CH, Vadiaka M, Kontos A, Katsorida M, Dimitrakopoulos A, et al. Efficacy of ondansetron treatment for acute emesis with different dosing schedules 8 vs 32 mg. A randomized study. *J Exp Clin Cancer Res*. 2001;20(1):29-34.
252. Tsavaris N, Mylonakis N, Bacoyiannis C, Karvounis N, Charalambidis G, Pagou M, et al. Efficacy of ondansetron treatment with different timing schedules: a randomized double-blind study. *Oncology*. 1995;52(4):315-8.
253. Tsavaris NB, Koufos C, Katsikas M, Dimitrakopoulos A, Athanasiou E, Linardaki G. Antiemetic prophylaxis with ondansetron and methylprednisolone vs metoclopramide and methylprednisolone in mild and moderately emetogenic chemotherapy. *J Pain Symptom Manage*. 1999;18(3):218-22.
254. Tsavaris NB, Tsaroucha-Noutsou E, Karvounis N, Bacoyannis C, Pagou M, Kosmidis P. Comparison of different schedules of ondansetron (GR 38032F) administration during cisplatin-based chemotherapy: a randomized trial. *Chemotherapy*. 1995;41(1):70-6.
255. Tsuchida Y, Hayashi Y, Asami K, Yamamoto K, Yokoyama J, Mugishima H, et al. Effects of granisetron in children undergoing high-dose chemotherapy: a multi-institutional, cross-over study. *Int J Oncol*. 1999;14(4):673-9.
256. Tsuji D, Kim YI, Taku K, Nakagaki S, Ikematsu Y, Tsubota H, et al. Comparative trial of two intravenous doses of granisetron (1 versus 3 mg) in the prevention of chemotherapy-induced acute emesis: a double-blind, randomized, non-inferiority trial. *Support Care Cancer*. 2012;20(5):1057-64.
257. Tyson LB, Kris MG, Baltzer L, Pisters KM, Rigas JR, Clark RA. Randomized phase II trial comparing two versus three doses of ondansetron when used in combination with dexamethasone in patients receiving cisplatin > or = 100 mg/m<sup>2</sup>. *Am J Clin Oncol*. 1994;17(3):269-72.
258. Uchida K, Akaza H, Hattori K, Noguchi R, Kondo F, Ishikawa S, et al. Antiemetic efficacy of granisetron: a randomized crossover study in patients receiving cisplatin-containing intraarterial chemotherapy. *Jpn J Clin Oncol*. 1999;29(2):87-91.
259. Van Belle SJ, Stamatakis L, Bleiberg H, Cocquyt VF, Michel J, de Bruijn KM. Dose-finding study of tropisetron in cisplatin-induced nausea and vomiting. *Ann Oncol*. 1994;5(9):821-5.
260. Veroniki AA, Del Giovane C, Blondal E, Thavorn K, Straus SE, Tricco A. How to Model Different Dose-effects in Networks of Interventions? 2015 Canadian Agency for Drugs and Technologies in Health (CADTH) Symposium; Saskatoon, Saskatchewan.
261. Villalon A, Chan V. Multicenter, randomized trial of ramosetron plus dexamethasone versus ramosetron alone in controlling cisplatin-induced emesis. *Support Care Cancer*. 2004;12(1):58-63.
262. Warr D, Willan A, Fine S, Wilson K, Davis A, Erlichman C, et al. Superiority of granisetron to dexamethasone plus prochlorperazine in the prevention of chemotherapy-induced emesis. *J Natl Cancer Inst*. 1991;83(16):1169-73.
263. Watters J, Riley M, Pedley I, Whitehead A, Overend M, Goss I, et al. The development of a protocol for the use of 5-HT<sub>3</sub> antagonists in chemotherapy-induced nausea and vomiting. *Clin Oncol (R Coll Radiol)*. 2001;13(6):422-6.
264. White L, Daly SA, McKenna CJ, Zhestkova N, Leal C, Breatnach F, et al. A comparison of oral ondansetron syrup or intravenous ondansetron loading dose regimens given in combination with dexamethasone for the prevention of nausea and emesis in pediatric and adolescent patients receiving moderately/highly emetogenic chemotherapy. *Pediatr Hematol Oncol*. 2000;17(6):445-55.



265. Yalcin S, Tekuzman G, Baltali E, Ozisik Y, Barista I. Serotonin receptor antagonists in prophylaxis of acute and delayed emesis induced by moderately emetogenic, single-day chemotherapy: a randomized study. *Am J Clin Oncol*. 1999;22(1):94-6.
266. Yamac DC, G.; Coskun, U.; Abubakar, A.; Gunel, N. A comparative study of the efficacy, cost and adverse effects of the third generation antiemetic agents in cancer patients. *Turk Hematoloji-Onkoloji Dergisi*. 2002;12(1):12-5.
267. Yano S, Makino K, Nakamura H, Kai Y, Morioka M, Hamada J, et al. Comparative clinical study of the anti-emetic effects of oral ramosetron and injected granisetron in patients with malignant glioma undergoing ACNU chemotherapy. *Neurol Med Chir (Tokyo)*. 2005;45(6):294-8; discussion 8-9.
268. Yeilding A, Bertoli L, Eisenberg P, Plezia P, Modiano MR, Alberts DS, et al. Antiemetic efficacy of two different single intravenous doses of dolasetron in patients receiving high-dose cisplatin-containing chemotherapy. *Am J Clin Oncol*. 1996;19(6):619-23.
269. Yonemura M, Katsumata N, Hashimoto H, Satake S, Kaneko M, Kobayashi Y, et al. Randomized controlled study comparing two doses of intravenous granisetron (1 and 3 mg) for acute chemotherapy-induced nausea and vomiting in cancer patients: a non-inferiority trial. *Jpn J Clin Oncol*. 2009;39(7):443-8.
270. Yu Z, Liu W, Wang L, Liang H, Huang Y, Si X, et al. The efficacy and safety of palonosetron compared with granisetron in preventing highly emetogenic chemotherapy-induced vomiting in the Chinese cancer patients: a phase II, multicenter, randomized, double-blind, parallel, comparative clinical trial. *Support Care Cancer*. 2009;17(1):99-102.
271. Zeidman A, Ben Dayan D, Ben Zion T, Kaufman O, Cohen AM, Mittelman M. Granisetron and ondansetron for chemotherapy-related nausea and vomiting. *Haematologia (Budap)*. 1998;29(1):25-31.
272. Zeng XY, Wang AH, Liu YF, Chen Y, Shen Y, Shen ZX. Ramosetron for the management of chemotherapy-induced gastrointestinal events in patients with hematological malignancies. *Methods Find Exp Clin Pharmacol*. 2001;23(4):191-5.
273. Jorgensen M, Victor MA. Antiemetic efficacy of ondansetron and metoclopramide, both combined with corticosteroid, in malignant lymphoma patients receiving non-cisplatin chemotherapy. *Acta Oncol*. 1996;35(2):159-63.
274. Keat CH, Phua G, Abdul Kassim MS, Poh WK, Sriraman M. Can granisetron injection used as primary prophylaxis improve the control of nausea and vomiting with low-emetogenic chemotherapy? *Asian Pac J Cancer Prev*. 2013;14(1):469-73.
275. Huang J, Wang XJ, Yu D, Jin YN, Zhen LZ, Xu N, et al. The effect of palonosetron hydrochloride in the prevention of chemotherapy-induced moderate and severe nausea and vomiting. *Exp Ther Med*. 2013;5(5):1418-26.
276. Wenzell CM, Berger MJ, Blazer MA, Crawford BS, Griffith NL, Wesolowski R, et al. Pilot study on the efficacy of an ondansetron- versus palonosetron-containing antiemetic regimen prior to highly emetogenic chemotherapy. *Support Care Cancer*. 2013;21(10):2845-51.
277. Murakami M, Hashimoto H, Yamaguchi K, Yamaguchi I, Senba S, Siraishi T. Effectiveness of palonosetron for preventing delayed chemotherapy-induced nausea and vomiting following moderately emetogenic chemotherapy in patients with gastrointestinal cancer. *Support Care Cancer*. 2014;22(4):905-9.
278. Kim JS, Kim JY, Lee SJ, Park DK, Namgung H, Kim CN, et al. Multicenter nonrandomized trial of ramosetron versus palonosetron in controlling chemotherapy-induced nausea and vomiting for colorectal cancer. *Ann Surg Treat Res*. 2014;87(1):9-13.
279. Sanmukhani JJ, Pawar P, Mittal R. Ramosetron hydrochloride for the prevention of cancer chemotherapy induced nausea and vomiting: The Indian experience. *South Asian J Cancer*. 2014;3(2):132-7.
280. Ohzawa H, Miki A, Hozumi Y, Miyazaki C, Sagara Y, Tanaka Y, et al. Comparison between the antiemetic effects of palonosetron and granisetron in breast cancer patients treated with anthracycline-based regimens. *Oncol Lett*. 2015;9(1):119-24.
281. Anvari K, Seilanian-Toussi M, Hosseinzad-Ashkiki H, Shahidsales S. A Comparison of 5-HT<sub>3</sub> Receptor Antagonist and Metoclopramide in the Patients Receiving Chemotherapeutic Regimens Including CMF, CAF and CHOP. *Iran J Cancer Prev*. 2015;8(2):84-8.
282. Raftopoulos H, Cooper W, O'Boyle E, Gabrail N, Boccia R, Gralla RJ. Comparison of an extended-release formulation of granisetron (APF530) versus palonosetron for the prevention of chemotherapy-induced nausea and vomiting associated with moderately or highly emetogenic chemotherapy: results of a prospective, randomized, double-blind, noninferiority phase 3 trial. *Support Care Cancer*. 2015;23(3):723-32.

283. Karthaus M, Tibor C, Lorusso V, Singh-Arora R, Filippov A, Rizzi G, et al. Efficacy and safety of oral palonosetron compared with IV palonosetron administered with dexamethasone for the prevention of chemotherapy-induced nausea and vomiting (CINV) in patients with solid tumors receiving cisplatin-based highly emetogenic chemotherapy (HEC). *Support Care Cancer*. 2015;23(10):2917-23.
284. Kimura H, Yamamoto N, Shirai T, Nishida H, Hayashi K, Tanzawa Y, et al. Efficacy of triplet regimen antiemetic therapy for chemotherapy-induced nausea and vomiting (CINV) in bone and soft tissue sarcoma patients receiving highly emetogenic chemotherapy, and an efficacy comparison of single-shot palonosetron and consecutive-day granisetron for CINV in a randomized, single-blinded crossover study. *Cancer Med*. 2015;4(3):333-41.
285. Zoto T, Kilickap S, Yasar U, Celik I, Bozkurt A, Babaoglu MO. Improved anti-emetic efficacy of 5-HT<sub>3</sub> receptor antagonists in cancer patients with genetic polymorphisms of ABCB1 (MDR1) drug transporter. *Basic Clin Pharmacol Toxicol*. 2015;116(4):354-60.
286. Kim KR, Kang G, Ki MS, Shim HJ, Hwang JE, Bae WK, et al. A Randomized, Double-Blind Pilot Study of Dose Comparison of Ramosetron to Prevent Chemotherapy-Induced Nausea and Vomiting. *Biomed Res Int*. 2015;2015:523601.
287. Kim JE, Hong YS, Lee JL, Kim KP, Park SJ, Sym SJ, et al. A randomized study of the efficacy and safety of transdermal granisetron in the control of nausea and vomiting induced by moderately emetogenic chemotherapy in Korean patients. *Support Care Cancer*. 2015;23(6):1769-77.
288. Gabrail N, Yanagihara R, Spaczynski M, Cooper W, O'Boyle E, Smith C, et al. Pharmacokinetics, safety, and efficacy of APF530 (extended-release granisetron) in patients receiving moderately or highly emetogenic chemotherapy: results of two Phase II trials. *Cancer Manag Res*. 2015;7:83-92.
289. Kovacs G, Wachtel AE, Basharova EV, Spinelli T, Nicolas P, Kabickova E. Palonosetron versus ondansetron for prevention of chemotherapy-induced nausea and vomiting in paediatric patients with cancer receiving moderately or highly emetogenic chemotherapy: a randomised, phase 3, double-blind, double-dummy, non-inferiority study. *Lancet Oncol*. 2016;17(3):332-44.
290. Carreca I BF, Bronte G, Burgio M, Piazza D, Rizzo S. Impact of the new 5-HT<sub>3</sub> receptor antagonist palonosetron (P) in chemotherapy-induced nausea and vomiting (CINV) control in elderly advanced breast cancer (EABC) patients: Comparison with the classic antiemetic agent ondansetron (O). In *The 2007 Breast Cancer Symposium Proceedings Book*. 2007.
291. Kadota R SV, Messinger Y. Safety, pharmacokinetics, and efficacy of palonosetron in pediatric patients: A multicenter, stratified, double-blind, phase 3, randomized study. *Journal of Clinical Oncology*, 2007 ASCO Annual Meeting Proceedings (Post-Meeting Edition) Vol 25, No 18S (June 20 Supplement),page 9570. 2007.
292. Piyush S. To compare efficacy and cost effectiveness of different 5th 3 blockers in acute and delayed nausea and vomiting: A randomized study. *Journal of Cancer Science and Therapy*. 2011(3):234.
293. Tabei T, Inoue K, Segawa Y, Sano M, Sekine I, Tokuda Y, et al. A phase II dose-response study of palonosetron (PALO) in Japanese patients receiving moderately emetogenic chemotherapy (MEC)—Palo Japanese Cooperative Study Group. In *Annals of Oncology*, Vol 17, pp 302-303 2006.
294. Trifilio S, Kaniecki K, Zook J, Pi J, Carson K, Fishman M, et al. Long-Acting Serotonin Antagonist Palonosetron To Prevent Nausea and Vomiting after High-Dose Melphalan and Autograft in Myeloma." In *ASH Annual Meeting Abstracts*. 2006;108(11):5239.
295. Adel NG KA, Lucarelli C. . Use of palonosetron 0.25 mg IV daily and incidence of nausea and vomiting in patients undergoing bone marrow transplantation (BMT). *Journal of Clinical Oncology*. 2006;24(18 Suppl): 664S (Abstr 16510).
296. Persistence of efficacy of three antiemetic regimens and prognostic factors in patients undergoing moderately emetogenic chemotherapy. Italian Group for Antiemetic Research. *J Clin Oncol*. 1995;13(9):2417-26.
297. Delayed emesis induced by moderately emetogenic chemotherapy: do we need to treat all patients? The Italian Group for Antiemetic Research. *Ann Oncol*. 1997;8(6):561-7.
298. Bhatia A, Tripathi KD, Sharma M. Efficacy & tolerability of ondansetron compared to metoclopramide in dose dependent cisplatin-induced delayed emesis. *Indian J Med Res*. 2004;120(3):183-93.
299. Chevallier B. Efficacy and safety of granisetron compared with high-dose metoclopramide plus dexamethasone in patients receiving high-dose cisplatin in a single-blind study. The Granisetron Study Group. *Eur J Cancer*. 1990;26 Suppl 1:S33-6.

300. Dicato MA. Oral treatment with ondansetron in an outpatient setting. *Eur J Cancer*. 1991;27 Suppl 1:S18-9; discussion S22.
301. Hacking A. Oral granisetron--simple and effective: a preliminary report. The Granisetron Study Group. *Eur J Cancer*. 1992;28A Suppl 1:S28-32.
302. Hainsworth JD, Hesketh PJ. Single-dose ondansetron for the prevention of cisplatin-induced emesis: efficacy results. *Semin Oncol*. 1992;19(6 Suppl 15):14-9.
303. Hamadani M, Awab A, Chaudhary L, Tfayli A. Relative efficacy of ondansetron, granisetron, dolasetron and palonosetron in controlling acute nausea and vomiting associated with platinum-based chemotherapy. *J Oncol Pharm Pract*. 2006;12(2):67-8.
304. Liaw CC, Chang HK, Liau CT, Huang JS, Lin YC, Chen JS. Reduced maintenance of complete protection from emesis for women during chemotherapy cycles. *Am J Clin Oncol*. 2003;26(1):12-5.
305. Liaw CC, Wang CH, Chang HK, Kao CY, Huang JS. Control of cisplatin-induced emesis with intravenous ondansetron plus intravenous dexamethasone: a crossover study of triple 8-mg dose of ondansetron. *Am J Clin Oncol*. 2000;23(3):253-7.
306. Madej G, Krzakowski M, Pawinski A, Lasota W, Rogowski W, Skoneczna I. A report comparing the use of tropisetron (Navoban), a 5-HT<sub>3</sub> antagonist, with a standard antiemetic regimen of dexamethasone and metoclopramide in cisplatin-treated patients under conditions of severe emesis. *Semin Oncol*. 1994;21(5 Suppl 9):3-6.
307. Pielichowski W, Gawronski K, Mlot B, Oborska S, Wasko-Grabowska A, P R. Three-drug regimen (aprepitant + palonosetron + dexamethasone) for prevention of nausea and vomiting associated with BEAM chemotherapy preceding transplantation of autologous hematopoietic stem cells. *Current Gynecologic Oncology*. 2011;9(2):95-103.
308. Pielichowski W, Barzal J, Gawronski K, Mlot B, Oborska S, Wasko-Grabowska A, et al. A triple-drug combination to prevent nausea and vomiting following BEAM chemotherapy before autologous hematopoietic stem cell transplantation. *Transplant Proc*. 2011;43(8):3107-10.
309. Smith IE. A comparison of two dose levels of granisetron in patients receiving moderately emetogenic cytostatic chemotherapy. The Granisetron Study Group. *Eur J Cancer*. 1990;26 Suppl 1:S19-23.
310. Sorbe BG, Hogberg T, Glimelius B, Schmidt M, Wernstedt L, Andersson H, et al. Navoban (tropisetron) alone and in combination with dexamethasone in the prevention of chemotherapy-induced nausea and vomiting: the Nordic experience. The Nordic Antiemetic Trial Group. *Anticancer Drugs*. 1995;6 Suppl 1:31-6.
311. Soukop M. A comparison of two dose levels of granisetron in patients receiving high-dose cisplatin. The Granisetron Study Group. *Eur J Cancer*. 1990;26 Suppl 1:S15-9.
312. Soukop M. A dose-finding study of granisetron, a novel antiemetic, in patients receiving high-dose cisplatin. Granisetron Study Group. *Support Care Cancer*. 1994;2(3):177-83.
313. Soukop M. Management of cyclophosphamide-induced emesis over repeat courses. *Oncology*. 1996;53 Suppl 1:39-45.

## Appendix B. Study Characteristics

| Author, year                              | Country of conduct                                                   | Study conduct period              | Duration of Study (Days) | Setting       | Interventions examined                                                                | Outcomes Reported                                                  |
|-------------------------------------------|----------------------------------------------------------------------|-----------------------------------|--------------------------|---------------|---------------------------------------------------------------------------------------|--------------------------------------------------------------------|
| <i>Randomized clinical trials (n=246)</i> |                                                                      |                                   |                          |               |                                                                                       |                                                                    |
| Kovacs, 2016                              | USA, Latin America, Europe, Russia                                   | September 2011 - October 2012     | 5                        | Multi-centre  | Palonosetron + Steroid, Ondansetron + Steroid                                         | Nausea, CINV, Mortality, Use of rescue medication, QT prolongation |
| Gabrail, 2015(b)                          | Poland                                                               | NR                                | 7                        | Multi-centre  | Granisetron + Steroid                                                                 | CINV                                                               |
| Karthaus, 2015                            | USA, Latin America, Europe, Asia, Commonwealth of Independent States | June, 21 2011 - November, 14 2012 | 5                        | Multi-centre  | Palonosetron + Steroid                                                                | Nausea, Vomiting, Mortality, Use of rescue medication, Arrhythmia  |
| Kim K, 2015                               | South Korea                                                          | October 2012 - October 2013       | 8                        | Single centre | Ramosetron + Steroid                                                                  | CINV, Use of rescue medication, QT prolongation                    |
| Kim JE, 2015                              | South Korea                                                          | February 2012 - March 2013        | 5                        | Multi-centre  | Granisetron + Steroid                                                                 | CINV                                                               |
| Kimura, 2015                              | Japan                                                                | 1 April 2011-31 March 2013        | 10                       | NR            | Palonosetron + Steroid, Granisetron + Steroid                                         | CINV                                                               |
| Ohzawa, 2015                              | Japan                                                                | NR                                | 21                       | Single centre | Granisetron + Steroid, Palonosetron + Steroid                                         | CINV                                                               |
| Raftopolous, 2015                         | USA, India, Poland                                                   | June 2006 - August 2008           | 5                        | Multi-centre  | Granisetron + Steroid, Palonosetron + Steroid                                         | Nausea, Vomiting, CINV, Mortality                                  |
| Sanmukhani, 2014                          | India                                                                | NR                                | 5                        | Multi-centre  | Ramosetron, Ondansetron                                                               | CINV, Use of rescue medication                                     |
| Huang, 2013                               | China                                                                | September 2009 - September 2010   | 5                        | Multi-centre  | Palonosetron + Granisetron                                                            | Nausea, Vomiting                                                   |
| Wenzell, 2013                             | USA                                                                  | January 2011-July 2011            | 5                        | Single centre | Ondansetron + Steroid, Palonosetron + Steroid                                         | Nausea, Vomiting, CINV, Use of rescue medication                   |
| Boccia, 2013                              | Europe, USA, Mexico                                                  | NR                                | 5                        | Multi-centre  | Palonosetron + Steroid                                                                | Nausea, Vomiting, CINV                                             |
| Endo, 2012                                | Japan                                                                | November 2010 - March 2012,       | 5                        | Single centre | Azasetron + Steroid, Granisetron + Steroid                                            | Vomiting, CINV                                                     |
| Ithimakin, 2012                           | Thailand                                                             | March 2009 - March 2010           | 5                        | NR            | Ondansetron + Steroid, Ondansetron + Steroid + Metoclopramide                         | Nausea, Vomiting, CINV                                             |
| Noor, 2012                                | USA                                                                  | December 2006 - August 2008       | 21                       | Single centre | Palonosetron                                                                          | Nausea, Vomiting                                                   |
| Roscoe, 2012                              | USA                                                                  | May 2007 - September 2010         | 3                        | Multi-centre  | Granisetron + Steroid + Prochloroperazine, Palonosetron + Steroid + Prochloroperazine | Nausea                                                             |
| Tsuji, 2012                               | Japan                                                                | December 2007 - January 2009      | 1                        | Multi-centre  | Granisetron + Steroid                                                                 | Nausea, Vomiting                                                   |
| Boccia, 2011                              | Europe, Mexico, India and USA                                        | January - October 2006            | 22                       | Multi-centre  | Granisetron                                                                           | Vomiting, CINV, Mortality, QT Interval                             |
| Dong, 2011                                | China                                                                | May 2009 - March 2010             | 7                        | Single centre | Ondansetron, Palonosetron,                                                            | Nausea, Vomiting, CINV, Delirium                                   |
| Giralt, 2011                              | USA                                                                  | NR                                | 8                        | NR            | Palonosetron + Steroid                                                                | Nausea, Vomiting                                                   |

|                           |                                                  |                                        |   |               |                                                                      |                                                |
|---------------------------|--------------------------------------------------|----------------------------------------|---|---------------|----------------------------------------------------------------------|------------------------------------------------|
| Piyush, 2011*             | NR                                               | NR                                     | 3 | NR            | Ondansetron, Granisetron, Palonosetron                               | CINV                                           |
| Siddique, 2011            | Bangladesh                                       | January 2008 - April 2009              | 4 | Single centre | Granisetron, Ondansetron                                             | Nausea, Vomiting, CINV                         |
| Tian, 2011                | China                                            | NR                                     | 5 | Multi-centre  | Granisetron, Palonosetron                                            | Vomiting, CINV, Arrhythmia                     |
| Ghosh, 2010               | India                                            | November 05 2007 - September 30 - 2009 | 5 | Single centre | Granisetron + Steroid, Ondansetron + Steroid, Palonosetron + Steroid | Vomiting, CINV, Mortality, QT Interval         |
| Ho, 2010                  | Taiwan                                           | January 2006 - December 2007           | 1 | Multi-centre  | Granisetron + Steroid, Ramosetron + Steroid                          | Nausea, Vomiting, CINV                         |
| Kaushal, 2010             | India                                            | NR                                     | 5 | Single centre | Ondansetron + Steroid, Palonosetron + Steroid                        | Nausea, Vomiting                               |
| Mattiuzzi, 2010           | USA                                              | October 2005 - April 2008              | 7 | NR            | Ondansetron + Steroid, Palonosetron + Steroid                        | Nausea, Vomiting, Arrhythmia                   |
| Keyhanian, 2009           | Iran                                             | 2003-2004                              | 1 | NR            | Granisetron, Granisetron + Steroid                                   | Nausea, Vomiting                               |
| Maemondo, 2009            | Japan                                            | April-October 2005                     | 5 | Multi-centre  | Palonosetron + Steroid                                               | Vomiting, CINV                                 |
| Saito, 2009               | Japan                                            | July 5, 2006 to May 31, 2007           | 5 | Multi-centre  | Granisetron + Steroid, Palonosetron + Steroid                        | Nausea, Vomiting, CINV, Mortality, QT Interval |
| Segawa, 2009              | Japan                                            | April - November 2005                  | 5 | Multi-centre  | Palonosetron + Steroid                                               | Vomiting, QT Interval                          |
| Yonemura, 2009            | Japan                                            | January 2006 - October 2006            | 5 | NR            | Granisetron                                                          | Vomiting, CINV                                 |
| Yu, 2009                  | China                                            | May 2006 - December 2006               | 5 | Multi-centre  | Granisetron, Palonosetron                                            | Vomiting                                       |
| Chen, 2008                | Taiwan                                           | December 1995 - March 2001             | 6 | Single centre | Ondansetron + Steroid                                                | Nausea, Vomiting, Mortality                    |
| Fabi, 2008                | Italy                                            | December 2002 - January 2005,          | 6 | NR            | Ondansetron + Steroid                                                | Nausea, Vomiting                               |
| Nagel, 2008               | Canada                                           | April 1999 - February 2007             | 2 | Single centre | Ondansetron, Placebo                                                 | Nausea, Vomiting                               |
| Sepúlveda-Vildósola, 2008 | Mexico                                           | August 2007 - December 2007            | 7 | Single centre | Ondansetron, Palonosetron                                            | Nausea, Vomiting                               |
| Berrak, 2007              | Turkey                                           | June 2003 - September 2006             | 5 | Single centre | Granisetron                                                          | CINV                                           |
| Herrstedt, 2007           | Denmark                                          | NR                                     | 9 | NR            | Tropisetron, Tropisetron + Metopimazine                              | Nausea, Vomiting                               |
| Kadota, 2007*             | USA                                              | NR                                     | 1 | NR            | Palonosetron                                                         | Vomiting, Arrhythmia                           |
| Pectasides, 2007          | Greece                                           | NR                                     | 3 | Multi-centre  | Ondansetron                                                          | Nausea, Vomiting                               |
| Shi, 2007                 | China                                            | March 2003 - March 2004                | 5 | NR            | Ondansetron, Ramosetron                                              | Nausea, Vomiting                               |
| Aapro, 2006               | Switzerland, USA, Russia, Mexico, Italy, Germany | July 2000 - December 2001              | 5 | Multi-centre  | Ondansetron + Steroid, Palonosetron + Steroid                        | Nausea, Vomiting, CINV, QT Interval            |
| Pinarli, 2006             | Turkey                                           | NR                                     | 1 | Single centre | Granisetron, Ondansetron                                             | Arrhythmia, QT Interval                        |
| Tabei, 2006*              | Japan                                            | NR                                     | 5 | Multi-centre  | Palonosetron                                                         | Vomiting                                       |
| Buyukavci, 2005           | Turkey                                           | NR                                     | 1 | NR            | Granisetron, Ondansetron                                             | QT Interval                                    |
| Cheersilpa, 2005          | Thailand                                         | February 2003 - August 2003            | 5 | Single centre | Granisetron + Steroid, Ramosetron + Steroid                          | Nausea, Vomiting, CINV                         |
| Corapcioglu, 2005         | Turkey                                           | October 2003 - March 2004              | 1 | Single centre | Ondansetron + Steroid                                                | CINV                                           |
| Kurnianda, 2005           | Indonesia                                        | June 2003- November 2003               | 1 | Single centre | Granisetron + Steroid                                                | Nausea, Vomiting                               |
| Lindley, 2005             | USA                                              | NR                                     | 5 | Multi-centre  | Ondansetron + Steroid + Prochlorperazine, Ondansetron + Steroid      | Nausea, Vomiting, CINV                         |
| Mandanas, 2005            | USA                                              | May 1997 - March 2001                  | 6 | Multi-centre  | Dolasetron + Steroid, Ondansetron + Steroid                          | Nausea, Vomiting, CINV                         |
| Yano, 2005                | Japan                                            | NR                                     | 2 | NR            | Granisetron, Ramosetron                                              | Nausea, Vomiting                               |

|                     |                                              |                                    |                   |               |                                                                              |                                                |
|---------------------|----------------------------------------------|------------------------------------|-------------------|---------------|------------------------------------------------------------------------------|------------------------------------------------|
| Eisenberg, 2004     | NR                                           | NR                                 | 7                 | Multi-centre  | Palonosetron                                                                 | Vomiting, CINV, QT Interval                    |
| Jaing, 2004         | Taiwan                                       | July 2000 - June 2002              | 1                 | Single centre | Granisetron, Ondansetron                                                     | Vomiting, CINV                                 |
| Kim, 2004           | Korea                                        | April 2002 - October 2002          | 7                 | NR            | Dolasetron, Ondansetron                                                      | Nausea, Vomiting, QT Interval                  |
| Tantipalakorn, 2004 | Thailand                                     | February 1, 2003 - July 31, 2003   | 1                 | NR            | Ramosetron                                                                   | Nausea, Vomiting                               |
| Villalon, 2004      | Philippines                                  | NR                                 | 3                 | Multi-centre  | Ramosetron + Dexamethasone, Ramosetron                                       | Nausea, Vomiting, CINV                         |
| Aapro, 2003         | Switzerland, Italy                           | May 28, 1996 - April 30, 1999      | 6                 | Multi-centre  | Granisetron + Steroid, Granisetron + Steroid + Metoclopramide                | Vomiting, CINV                                 |
| Bhatia, 2003        | India                                        | April 1998 - February 1999         | 1                 | Multi-centre  | Ondansetron, Ondansetron + Steroid, Metoclopramide, Metoclopramide + Steroid | Nausea, Vomiting                               |
| Eisenberg, 2003     | USA, Mexico                                  | May 2000 - December 2001           | 5                 | Multi-centre  | Dolasetron, Palonosetron                                                     | Nausea, Vomiting, CINV, Mortality, QT Interval |
| Gralla, 2003        | Germany, Italy, UK, The Netherlands, Russia. | August 01, 2000 - October 02, 2001 | 5                 | Multi-centre  | Ondansetron, Palonosetron                                                    | Vomiting, CINV, Mortality, QT Interval         |
| Koizumi, 2003       | Japan                                        | March 1998 - June 1999             | 7                 | Single centre | Granisetron + Steroid, Ramosetron + Steroid                                  | Nausea, Vomiting                               |
| Matsuoka, 2003      | Japan                                        | May 1997 to June 1999              | 10                | NR            | Granisetron, Granisetron + Steroid                                           | Nausea, Vomiting, Arrhythmia                   |
| Sagae, 2003         | Japan                                        | January 1996 - December 1998       | 7                 | Single centre | Granisetron, Granisetron + Steroid                                           | Nausea, Vomiting, CINV                         |
| Feng, 2002a         | China                                        | NR                                 | 1                 | Multi-centre  | Granisetron, Ramosetron                                                      | Nausea, Vomiting                               |
| Feng, 2002b         | China                                        | NR                                 | 1                 | Multi-centre  | Granisetron, Ramosetron                                                      | Nausea, Vomiting                               |
| Kang, 2002          | Korea                                        | July 1998 - January 1999           | 1                 | Multi-centre  | Granisetron, Ramosetron                                                      | Nausea, Vomiting                               |
| Noda, 2002          | Japan                                        | NR                                 | 1                 | Multi-centre  | Ondansetron, Ramosetron                                                      | Nausea, Vomiting                               |
| Noda, 2002          | Japan                                        | NR                                 | 1                 | Multi-centre  | Ramosetron, Placebo                                                          | Nausea, Vomiting, CINV                         |
| Aksoylar, 2001      | Turkey                                       | NR                                 | 8                 | Single centre | Granisetron, Tropisetron                                                     | Nausea, Vomiting, CINV                         |
| de Wit, 2001        | The Netherlands                              | NR                                 | NR                | NR            | Granisetron + Steroid, Ondansetron + Steroid                                 | Vomiting, CINV                                 |
| Fox-Geiman, 2001    | USA                                          | September 1997 - September 1998    | 8                 | NR            | Granisetron + Steroid, Ondansetron + Steroid                                 | Nausea, Vomiting, CINV                         |
| Koralewski, 2001    | Poland                                       | NR                                 | 7                 | Multi-centre  | Ondansetron + Steroid, Metoclopramide + Steroid                              | Nausea, Vomiting, Mortality                    |
| Ozgur Tan, 2001     | Turkey                                       | NR                                 | less than one day | Single centre | Ondansetron, Placebo                                                         | Nausea, Vomiting                               |
| Parker, 2001        | USA                                          | NR                                 | 2                 | Single centre | Ondansetron, Placebo                                                         | Vomiting                                       |
| Tsavaris, 2001a     | Greece                                       | November 1995 - May 1997           | 4                 | NR            | Ondansetron + Steroid                                                        | Nausea, Vomiting                               |
| Tsavaris, 2001b     | Greece                                       | NR                                 | 4                 | NR            | Ondansetron + Steroid                                                        | Nausea, Vomiting                               |
| Abang, 2000         | USA                                          | January 1996 - October 1997        | 10                | NR            | Granisetron                                                                  | Vomiting, Delirium, Mortality                  |
| Barrajon, 2000      | Spain                                        | January 16, 1995 - August 19, 1996 | 7                 | Single centre | Granisetron + Steroid, Ondansetron + Steroid, Tropisetron + Steroid          | Nausea, Vomiting                               |
| Chiou, 2000         | Taiwan                                       | NR                                 | 7                 | NR            | Granisetron + Steroid, Ondansetron + Steroid                                 | Nausea, Vomiting                               |
| Chua, 2000          | China                                        | March 1996 - May 1998              | 3                 | NR            | Granisetron + Steroid, Ondansetron + Steroid, Tropisetron + Steroid          | CINV                                           |
| Fausser, 2000       | Germany, Italy, Austria, France, UK          | December 1995 - November 1997      | 5                 | Multi-centre  | Dolasetron, Dolasetron + Steroid                                             | Nausea, Vomiting                               |

|                                                         |                                                                                                                          |                               |     |               |                                                                                                                  |                                                   |
|---------------------------------------------------------|--------------------------------------------------------------------------------------------------------------------------|-------------------------------|-----|---------------|------------------------------------------------------------------------------------------------------------------|---------------------------------------------------|
| Forni, 2000                                             | Italy                                                                                                                    | November 1995 - December 1997 | 717 | NR            | Granisetron + Steroid, Ondansetron + Steroid, Tropisetron + Steroid                                              | Vomiting                                          |
| Friedman, 2000                                          | USA                                                                                                                      | from 1992 - 1993              | 10  | Multi-centre  | Granisetron, Prochlorperazine                                                                                    | Nausea, Vomiting, Mortality, Sudden Cardiac Death |
| Herrington, 2000                                        | USA                                                                                                                      | July 1997 - February 1999     | 1   | Single centre | Granisetron + Steroid, Ondansetron + Steroid                                                                     | Nausea, Vomiting, CINV                            |
| Hesketh, 2000                                           | USA                                                                                                                      | NR                            | 1   | Multi-centre  | Granisetron + Steroid                                                                                            | Nausea, Vomiting, CINV                            |
| Koenig, 2000                                            | Germany                                                                                                                  | NR                            | 10  | NR            | Metoclopramide, Tropisetron                                                                                      | CINV                                              |
| Oge, 2000                                               | Turkey                                                                                                                   | October 1997 - March 1998     | 3   | Single centre | Granisetron, Ondansetron, Tropisetron                                                                            | Vomiting, CINV                                    |
| Raynov, 2000                                            | Bulgaria                                                                                                                 | 1992 - 1997                   | 6   | Single centre | Granisetron, Granisetron + Steroid, Metoclopramide, Metoclopramide + Steroid, Ondansetron, Ondansetron + Steroid | Nausea, Vomiting                                  |
| Roila [The Italian Group for Antiemetic Research], 2000 | Italy, Yugoslavia                                                                                                        | September 1997 - June 1999    | 5   | Multi-centre  | Ondansetron, Ondansetron + Steroid, Dexamethasone, Placebo                                                       | Nausea, Vomiting, CINV, Mortality                 |
| Slaby, 2000                                             | Czech Republic                                                                                                           | December 1996 - March 1998    | 10  | NR            | Granisetron, Ondansetron, Tropisetron                                                                            | Vomiting, CINV                                    |
| Stewart, 2000                                           | UK                                                                                                                       | NR                            | NR  | Single centre | Ondansetron + Steroid and/or Metoclopramide, Granisetron + Steroid and/or Metoclopramide                         | Nausea, Vomiting                                  |
| White, 2000                                             | Australia, UK, Russia, Mexico, Ireland, Czech Republic, Taiwan, Poland, Belgium,... 13 countries                         | NR                            | 8   | Multi-centre  | Ondansetron + Steroid                                                                                            | Nausea, Vomiting                                  |
| Davidson, 1999                                          | Australia, Austria, Belgium, Canada, France, Germany, Holland, New Zealand, Norway, South Africa, Spain, Switzerland, UK | NR                            | 3   | Multi-centre  | Ondansetron                                                                                                      | Nausea, Vomiting                                  |
| Kandemir, 1999                                          | Turkey                                                                                                                   | NR                            | 5   | NR            | Ondansetron + Steroid, Ondansetron + Steroid + Metoclopramide                                                    | CINV                                              |
| Komada, 1999                                            | Japan                                                                                                                    | March 1994 - June 1996        | 3   | NR            | Granisetron                                                                                                      | Vomiting                                          |
| Lazarus, 1999                                           | USA                                                                                                                      | NR                            | 2   | Single centre | Granisetron                                                                                                      | Vomiting                                          |
| Needles, 1999                                           | USA, Puerto Rico, Mexico                                                                                                 | NR                            | 8   | Multi-centre  | Ondansetron                                                                                                      | Nausea, Vomiting                                  |
| Orchard, 1999                                           | USA                                                                                                                      | NR                            | 10  | Single centre | Granisetron + Steroid, Ondansetron + Steroid                                                                     | Nausea, Vomiting, Delirium                        |
| Raynov, 1999                                            | Bulgaria                                                                                                                 | NR                            | NR  | Single centre | Ondansetron                                                                                                      | Nausea, Vomiting                                  |
| Sandoval, 1999                                          | USA                                                                                                                      | NR                            | 2   | NR            | Ondansetron                                                                                                      | CINV                                              |
| Sigsgaard, 1999                                         | Denmark                                                                                                                  | NR                            | 5   | NR            | Granisetron, Metopimazine + Steroid                                                                              | CINV                                              |
| Stiakaki, 1999                                          | Greece                                                                                                                   | July 1995 - June 1996         | 1   | NR            | Ondansetron, Tropisetron                                                                                         | CINV                                              |
| Tatsumi, 1999                                           | Japan                                                                                                                    | July 1995 - March 1997        | 1   | Multi-centre  | Granisetron                                                                                                      | Nausea, Vomiting                                  |
| The Italian Multicenter Study Group, 1999               | Italy                                                                                                                    | NR                            | 3   | Multi-centre  | Granisetron, Granisetron + Steroid                                                                               | Nausea, Vomiting, CINV                            |

|                  |                                                                                                                         |                                  |    |               |                                                 |                                                             |
|------------------|-------------------------------------------------------------------------------------------------------------------------|----------------------------------|----|---------------|-------------------------------------------------|-------------------------------------------------------------|
| Tsuchida, 1999   | Japan                                                                                                                   | February 1994 - July 1996        | 1  | NR            | Granisetron                                     | Vomiting                                                    |
| Uchida, 1999     | Japan                                                                                                                   | January 1994 - April 1995        | 5  | NR            | Granisetron, Placebo                            | Nausea, Vomiting, CINV                                      |
| Yalcin, 1999     | Turkey                                                                                                                  | NR                               | 5  | NR            | Granisetron, Ondansetron, Tropisetron           | Vomiting                                                    |
| Birch, 1998      | USA                                                                                                                     | April 1995 - May 1997            | 5  | Multi-centre  | Granisetron + Steroid                           | CINV                                                        |
| Gralla, 1998     | USA                                                                                                                     | NR                               | 1  | Multi-centre  | Granisetron + Steroid, Ondansetron + Steroid    | Nausea, Vomiting, CINV                                      |
| Handberg, 1998   | Denmark                                                                                                                 | NR                               | 3  | NR            | Granisetron, Granisetron + Steroid              | Nausea, Vomiting                                            |
| Kalaycio, 1998   | USA                                                                                                                     | September 1994 - April 1996      | 7  | NR            | Granisetron + Steroid, Ondansetron + Steroid    | Vomiting                                                    |
| Kleisbauer, 1998 | NR                                                                                                                      | NR                               | 11 | NR            | Granisetron, Granisetron + Steroid              | Nausea, Vomiting, CINV, Mortality                           |
| Krzakowski, 1998 | Canada, France, Germany, Iceland, Italy, Poland, South Africa, UK                                                       | NR                               | 1  | Multi-centre  | Ondansetron + Steroid                           | Nausea, Vomiting                                            |
| Latreille, 1998  | Canada                                                                                                                  | April 1991 - June 1994           | 7  | Multi-centre  | Granisetron + Steroid                           | Nausea, Vomiting, CINV                                      |
| Martoni, 1998    | Italy                                                                                                                   | July 1994 - February 1997        | 56 | Single centre | Granisetron + Steroid                           | Nausea, Vomiting, CINV                                      |
| Perez, 1998      | USA                                                                                                                     | NR                               | 30 | Multi-centre  | Granisetron + Steroid, Ondansetron + Steroid    | Nausea, Vomiting, CINV                                      |
| Perez, 1998      | USA                                                                                                                     | May 1994 - August 1995           | 2  | NR            | Granisetron + Steroid, Ondansetron + Steroid    | Nausea, Vomiting, CINV, Arrhythmia                          |
| Poon, 1998       | Hong Kong                                                                                                               | NR                               | 7  | NR            | Granisetron, Ondansetron                        | Nausea, Vomiting                                            |
| Ritter, 1998     | USA                                                                                                                     | August 1992 - February 1994      | 7  | Multi-centre  | Granisetron                                     | CINV                                                        |
| Scoponi, 1998    | Italy                                                                                                                   | Jan 4, 1994 - Jan 10, 1996       | NR | NR            | Granisetron + Steroid, Ondansetron + Steroid    | Nausea, CINV                                                |
| Sorbe, 1998      | Sweden                                                                                                                  | January 01, 1995 - June 30, 1996 | 6  | Multi-centre  | Tropisetron + Steroid, Dexamethasone            | Nausea, Vomiting, CINV                                      |
| Spector, 1998    | USA                                                                                                                     | NR                               | 1  | Multi-centre  | Granisetron, Ondansetron                        | Nausea, Vomiting                                            |
| Tsavaris, 1998   | Greece                                                                                                                  | NR                               | 4  | NR            | Ondansetron                                     | Vomiting                                                    |
| Zeidman, 1998    | Israel                                                                                                                  | April 1994 - October 1994        | 1  | Single centre | Granisetron, Ondansetron                        | Nausea, Vomiting                                            |
| Beck, 1997       | USA                                                                                                                     | NR                               | 3  | Multi-centre  | Ondansetron                                     | Nausea, Vomiting, Mortality                                 |
| Chevallier, 1997 | France                                                                                                                  | January 1992 - February 1994     | 1  | Multi-centre  | Dolasetron, Metoclopramide                      | Nausea, Vomiting, Mortality                                 |
| Davidson, 1997   | Australia, Austria, Belgium, Denmark, France, Germany, Holland, Israel, Norway, South Africa, Sweden, Switzerland, UK   | NR                               | 3  | Multi-centre  | Ondansetron                                     | Nausea, Vomiting                                            |
| du Bois, 1997    | Austria, Belgium, Canada, Germany, Hungary, Ireland, Italy, Spain, Sweden, United Arab Emirates/Bahrain, United Kingdom | NR                               | 3  | NR            | Ondansetron + Steroid, Metoclopramide + Steroid | Nausea, Vomiting, Delirium, Mortality, Sudden Cardiac Death |
| Fumoleau, 1997   | France                                                                                                                  | NR                               | 3  | Multi-centre  | Ondansetron                                     | Nausea, Vomiting                                            |
| Gridelli, 1997   | Italy                                                                                                                   | NR                               | 5  | NR            | Ondansetron, Ondansetron + Steroid              | Nausea, Vomiting                                            |
| Grote, 1997      | USA                                                                                                                     | NR                               | 2  | Multi-centre  | Dolasetron                                      | Nausea, Vomiting, Arrhythmia, QT                            |



|                                                         |                                                                                     |                                |    |               |                                                                      | Interval                                                   |
|---------------------------------------------------------|-------------------------------------------------------------------------------------|--------------------------------|----|---------------|----------------------------------------------------------------------|------------------------------------------------------------|
| Kasimis, 1997                                           | USA                                                                                 | NR                             | 1  | Multi-centre  | Dolasetron                                                           | Nausea, Vomiting, QT Interval                              |
| Kigawa, 1997                                            | Japan                                                                               | January 1993 - December 1995   | 1  | Single centre | Granisetron, Granisetron + Steroid, Metoclopramide                   | Vomiting, CINV                                             |
| Kris, 1997                                              | USA                                                                                 | March 1995 - November 1995     | 1  | Multi-centre  | Dolasetron + Steroid                                                 | Nausea, Vomiting, Mortality                                |
| Lofters, 1997                                           | Canada                                                                              | May 1993 - January 1995        | 7  | Multi-centre  | Dolasetron, Dolasetron + Steroid, Ondansetron, Ondansetron + Steroid | Nausea, Vomiting, Mortality, QT Interval, QRS interval     |
| Mustacchi, 1997                                         | Italy                                                                               | NR                             | 6  | Single centre | Ondansetron + Steroid + Metoclopramide                               | CINV                                                       |
| Park, 1997                                              | Korea                                                                               | December 1994 - May 1995       | 7  | Single centre | Granisetron, Ondansetron                                             | Vomiting, CINV, Delirium                                   |
| Pectasides, 1997                                        | Greece                                                                              | October 1992 - May 1994        | 5  | Single centre | Ondansetron + Steroid                                                | Nausea, Vomiting                                           |
| Perez, 1997                                             | USA                                                                                 | NR                             | 7  | Multi-centre  | Granisetron                                                          | Nausea, Vomiting, Arrhythmia                               |
| Roila [The Italian Group for Antiemetic Research], 1997 | Italy                                                                               | December 1994 - September 1995 | 6  | Multi-centre  | Ondansetron + Steroid, Ondansetron + Steroid + Metoclopramide        | Nausea, Vomiting, CINV                                     |
| Rubenstein, 1997                                        | USA                                                                                 | NR                             | 1  | Multi-centre  | Dolasetron                                                           | Nausea, Vomiting, Arrhythmia, QT Interval                  |
| Advani, 1996                                            | India                                                                               | NR                             | 5  | Single centre | Ondansetron, Metoclopramide                                          | Nausea, Vomiting                                           |
| Audhuy, 1996                                            | France, Spain, Belgium                                                              | NR                             | 1  | Multi-centre  | Dolasetron, Granisetron                                              | Nausea, Vomiting, Arrhythmia, QT Interval                  |
| Barrenetxea, 1996                                       | Spain                                                                               | NR                             | 5  | Single centre | Ondansetron, Ondansetron + Metoclopramide                            | Vomiting                                                   |
| Brock, 1996                                             | Belgium, Netherlands, Denmark, Sweden and Finland                                   | November 1992 - June 1994      | 9  | NR            | Ondansetron                                                          | Nausea, Vomiting                                           |
| Crucitt, 1996                                           | USA                                                                                 | NR                             | 3  | Multi-centre  | Ondansetron, Prochlorperazine                                        | Nausea, Vomiting                                           |
| de Wit, 1996                                            | The Netherlands                                                                     | NR                             | 1  | NR            | Ondansetron                                                          | Nausea, Vomiting                                           |
| Fauser, 1996a                                           | NR                                                                                  | NR                             | 1  | Multi-centre  | Dolasetron, Metoclopramide                                           | Nausea, Vomiting, CINV, Arrhythmia, Mortality, QT Interval |
| Fauser, 1996b                                           | Italy, France, Belgium, Germany, Spain,                                             | NR                             | 1  | Multi-centre  | Dolasetron, Ondansetron                                              | Nausea, Vomiting, Mortality                                |
| Fujimoto, 1996                                          | Japan                                                                               | NR                             | 1  | Single centre | Granisetron, Placebo                                                 | Vomiting, CINV                                             |
| Hesketh, 1996b                                          | USA                                                                                 | NR                             | 1  | Multi-centre  | Dolasetron, Ondansetron                                              | Nausea, Vomiting, Arrhythmia, Mortality, QT Interval       |
| Jorgensen, 1996                                         | Denmark                                                                             | NR                             | 5  | Single centre | Ondansetron + Steroid, Metoclopramide + Steroid                      | Nausea, Vomiting, CINV                                     |
| Leonardi, 1996                                          | Italy                                                                               | NR                             | NR | NR            | Granisetron, Ondansetron                                             | CINV                                                       |
| Martoni, 1996                                           | Italy                                                                               | March 1993 - June 1994         | 1  | Single centre | Granisetron, Ondansetron                                             | Nausea, Vomiting, CINV                                     |
| Massida & Ionta, 1996                                   | Italy                                                                               | NR                             | 5  | NR            | Granisetron, Ondansetron, Tropisetron                                | Nausea, Vomiting, CINV                                     |
| Matsui, 1996                                            | Japan                                                                               | April 1993 - January 1995      | 5  | NR            | Granisetron, Granisetron + Steroid + Prochlorperazine                | Nausea, Vomiting                                           |
| Olver, 1996                                             | Austria, Australia, Belgium, Canada, France, Germany, Ireland, Israel, Netherlands, | NR                             | 6  | Multi-centre  | Ondansetron, Placebo                                                 | Nausea, Vomiting, CINV                                     |

|                                                 | Protugal, South Africa, UK                                                                      |                              |    |               |                                                                                |                                   |
|-------------------------------------------------|-------------------------------------------------------------------------------------------------|------------------------------|----|---------------|--------------------------------------------------------------------------------|-----------------------------------|
| Peterson, 1996                                  | Sweden                                                                                          | NR                           | 14 | Single centre | Ondansetron, Ondansetron + Steroid                                             | Nausea, Vomiting                  |
| Yeilding, 1996                                  | USA                                                                                             | NR                           | 1  | Multi-centre  | Dolasetron                                                                     | Nausea, Vomiting                  |
| Adams, 1995                                     | UK                                                                                              | NR                           | 5  | Multi-centre  | Tropisetron, Tropisetron + Steroid                                             | Nausea, Vomiting, CINV            |
| Agura, 1995a                                    | USA                                                                                             | July 1991 - September 1992   | 35 | Single centre | Ondansetron                                                                    | Nausea, Vomiting, QT Interval     |
| Agura, 1995b                                    | USA                                                                                             | July 1991 - September 1992   | 35 | Single centre | Ondansetron                                                                    | Nausea, Vomiting                  |
| Alfieri, 1995                                   | Venezuela                                                                                       | NR                           | 1  | NR            | Ondansetron                                                                    | Vomiting                          |
| Alvarez, 1995                                   | USA                                                                                             | October 1991 - December 1993 | 1  | Multi-centre  | Ondansetron, Ondansetron + Steroid                                             | Vomiting                          |
| Bleiberg, 1995                                  | France, Belgium, Italy, Switzerland, Netherlands, Germany, Norway, South Africa, United Kingdom | NR                           | 14 | Multi-centre  | Granisetron                                                                    | CINV                              |
| Bonnetterre, 1995                               | France                                                                                          | June 1992 - March 1993       | 5  | NR            | Granisetron, Ondansetron                                                       | Nausea, Vomiting, CINV, Mortality |
| Chiou, 1995                                     | Taiwan                                                                                          | NR                           | 6  | NR            | Granisetron, Metoclopramide                                                    | CINV                              |
| Contu, 1995                                     | Italy                                                                                           | NR                           | 1  | Multi-centre  | Granisetron                                                                    | Nausea, Vomiting, CINV            |
| DiBenedetto, 1995                               | USA                                                                                             | NR                           | 3  | NR            | Ondansetron, Placebo                                                           | Vomiting                          |
| Dick, 1995                                      | UK                                                                                              | NR                           | 4  | NR            | Ondansetron, Metoclopramide + Steroid                                          | Vomiting                          |
| Fedele, 1995                                    | Italy                                                                                           | June 1993 - August 1994      | NR | Single centre | Granisetron, Ondansetron                                                       | Nausea, Vomiting, CINV            |
| Gebbia, 1995                                    | Italy                                                                                           | NR                           | 5  | NR            | Granisetron, Granisetron + Steroid, Granisetron + Steroid + Metoclopramide     | Nausea, Vomiting                  |
| Hahlen, 1995                                    | France, The Netherlands, UK                                                                     | NR                           | 1  | Multi-centre  | Granisetron, Chlorpromazine + Steroid                                          | Nausea, Vomiting, CINV            |
| Italian Group for Antiemetic Research, 1995     | Italy                                                                                           | December 1992 - July 1994    | 6  | NR            | Granisetron + Steroid + Metoclopramide, Ondansetron + Steroid + Metoclopramide | Nausea, Vomiting, CINV, Mortality |
| Labar, 1995                                     | Croatia                                                                                         | January 1992 - December 1993 | 15 | Single centre | Ondansetron, Metoclopramide                                                    | Nausea, Vomiting                  |
| Latreille, 1995                                 | Canada                                                                                          | NR                           | 3  | Multi-centre  | Granisetron, Granisetron + Steroid                                             | Nausea, Vomiting                  |
| Mantovani, 1995                                 | Italy                                                                                           | NR                           | 1  | NR            | Granisetron, Ondansetron, Tropisetron                                          | CINV                              |
| Marty, 1995                                     | France, Switzerland                                                                             | NR                           | 6  | Multi-centre  | Ondansetron, Tropisetron                                                       | Nausea, Vomiting, CINV, Mortality |
| Navari, 1995a                                   | USA                                                                                             | NR                           | 6  | Multi-centre  | Ondansetron                                                                    | Nausea, Vomiting                  |
| Navari, 1995b                                   | USA                                                                                             | NR                           | 11 | Multi-centre  | Granisetron, Ondansetron                                                       | Nausea, Vomiting, CINV            |
| Stewart, 1995                                   | Denmark, France, Germany, Holland, UK, South Africa                                             | NR                           | 5  | Multi-centre  | Granisetron, Ondansetron                                                       | Nausea, Vomiting                  |
| The Italian Group for Antiemetic Research, 1995 | Italy                                                                                           | December 1992 - January 1994 | 5  | Multi-centre  | Granisetron, Dexamethasone, Granisetron + Steroid                              | Nausea, Vomiting, CINV            |
| Tsavaris, 1995a                                 | Greece                                                                                          | NR                           | 1  | NR            | Ondansetron, Metoclopramide                                                    | Nausea, Vomiting, Delirium        |
| Tsavaris, 1995b                                 | Greece                                                                                          | November 1990 - May 1992     | 4  | NR            | Ondansetron                                                                    | Nausea, Vomiting                  |
| Ahn, 1994                                       | South Korea                                                                                     | October 1991 - April 1992    | 5  | NR            | Ondansetron, Ondansetron + Steroid                                             | Nausea, Vomiting                  |
| Carmichael, 1994                                | UK                                                                                              | NR                           | 2  | Multi-centre  | Granisetron, Granisetron + Steroid                                             | Nausea, Vomiting, CINV            |

|                  |                                                                                              |                                     |    |               |                                                              |                                                         |
|------------------|----------------------------------------------------------------------------------------------|-------------------------------------|----|---------------|--------------------------------------------------------------|---------------------------------------------------------|
| Chevallier, 1994 | France                                                                                       | NR                                  | 7  | Multi-centre  | Ondansetron, Ondansetron + Metoclopramide                    | Nausea, Vomiting                                        |
| Chiu, 1994       | Hong Kong                                                                                    | February 1990 - September 1991      | 5  | NR            | Ondansetron, Metoclopramide                                  | Nausea, Vomiting                                        |
| Cubeddu, 1994    | Venezuela                                                                                    | NR                                  | 3  | Multi-centre  | Ondansetron, Placebo                                         | Nausea, Vomiting                                        |
| Gebbia, 1994a    | Italy                                                                                        | NR                                  | 5  | NR            | Granisetron, Ondansetron                                     | Nausea, Vomiting                                        |
| Gebbia, 1994b    | Italy                                                                                        | NR                                  | 5  | NR            | Granisetron, Ondansetron                                     | Nausea, Vomiting                                        |
| Heron, 1994      | Belgium, France, Germany, Iceland, Netherlands, Norway, South Africa, Spain, Switzerland, UK | NR                                  | 7  | Multi-centre  | Granisetron, Granisetron + Steroid, Metoclopramide + Steroid | Nausea, Vomiting, CINV, Delirium, Mortality             |
| Hesketh, 1994    | USA                                                                                          | NR                                  | 6  | Multi-centre  | Ondansetron, Ondansetron + Steroid                           | Nausea, Vomiting                                        |
| Hulstaert, 1994  | Belgium                                                                                      | March 1992 - June 1993              | 6  | Multi-centre  | Tropisetron, Tropisetron + Steroid                           | CINV                                                    |
| Joss, 1994       | Switzerland                                                                                  | July 1990-November 1991             | 4  | Multi-centre  | Ondansetron, Ondansetron + Steroid                           | Nausea, Vomiting, CINV, Mortality, Sudden Cardiac Death |
| Kaizer, 1994     | Canada                                                                                       | March 1, 1991 - August 2, 1991      | 5  | Multi-centre  | Ondansetron + Steroid                                        | Nausea, Vomiting                                        |
| Lim, 1994        | Malaysia                                                                                     | January 1991-June 1991              | 6  | Single centre | Ondansetron, Metoclopramide + Steroid                        | Nausea, Vomiting                                        |
| Navari, 1994     | USA                                                                                          | November 1989-February 1991         | 1  | NR            | Granisetron                                                  | Nausea, Vomiting                                        |
| Noble, 1994      | Austria, France, Germany, The Netherlands, South Africa, UK                                  | July 1991 - November 1992           | 5  | Multi-centre  | Granisetron, Ondansetron                                     | Vomiting, CINV, Mortality                               |
| Riviere, 1994    | France, Germany, South Africa                                                                | NR                                  | 7  | Multi-centre  | Granisetron                                                  | Nausea, Vomiting, CINV, Mortality                       |
| Ruff, 1994       | Denmark, France, Germany, Netherlands, South Africa, Switzerland, UK                         | December 1991 - November 1992       | 1  | Multi-centre  | Granisetron, Ondansetron                                     | Nausea, Vomiting                                        |
| Sorbe, 1994      | Sweden and Finland                                                                           | February 1, 1991- February 29, 1992 | 6  | Multi-centre  | Tropisetron, Tropisetron + Steroid                           | Nausea, Vomiting                                        |
| Suarez, 1994     | France                                                                                       | NR                                  | 5  | NR            | Tropisetron, Placebo                                         | Nausea, Vomiting                                        |
| Tsavaris, 1994   | Greece                                                                                       | October 1990 - May 1992             | 4  | NR            | Ondansetron                                                  | Nausea, Vomiting                                        |
| Tyson, 1994      | USA                                                                                          | December 1989 - December 1990       | 1  | NR            | Ondansetron + Steroid                                        | Nausea, Vomiting                                        |
| Van Belle, 1994a | Switzerland, Belgium                                                                         | August 1987 - November 1989         | 7  | NR            | Tropisetron                                                  | Nausea, Vomiting, CINV, Mortality                       |
| Van Belle, 1994b | Switzerland, Belgium                                                                         | August 1987 - November 1989         | 7  | Multi-centre  | Tropisetron                                                  | Nausea, Vomiting, CINV, Mortality                       |
| Beck, 1993       | USA                                                                                          | March 1989 and January 1990         | 3  | Multi-centre  | Ondansetron, Placebo                                         | Nausea, Vomiting                                        |
| Bosi, 1993       | Italy                                                                                        | NR                                  | 8  | NR            | Ondansetron, Chlorpromazine                                  | Nausea, Vomiting                                        |
| Buser, 1993      | Switzerland                                                                                  | May 1988 - September 1989           | 15 | NR            | Ondansetron, Placebo                                         | Nausea, Vomiting, CINV                                  |
| Chevallier, 1993 | France, Switzerland, UK and West Germany                                                     | NR                                  | 7  | NR            | Granisetron, Metoclopramide + Steroid                        | CINV, Arrhythmia, Delirium                              |
| Cunningham, 1993 | UK                                                                                           | NR                                  | 1  | Multi-centre  | Ondansetron, Metoclopramide                                  | Vomiting                                                |
| Grunberg, 1993   | USA                                                                                          | NR                                  | 1  | Multi-centre  | Ondansetron                                                  | Nausea, Vomiting                                        |
| Herrstedt, 1993  | Denmark                                                                                      | NR                                  | 5  | NR            | Ondansetron, Ondansetron + Metopimazine                      | Nausea, Vomiting                                        |

|                                       |                                                                                               |                               |   |               |                                                 |                                       |
|---------------------------------------|-----------------------------------------------------------------------------------------------|-------------------------------|---|---------------|-------------------------------------------------|---------------------------------------|
| Hunter, 1993                          | France, Germany, Holland, Switzerland, UK                                                     | NR                            | 5 | Multi-centre  | Granisetron, Metoclopramide + Steroid           | CINV, Delirium                        |
| Jantunen, 1993                        | Finland                                                                                       | NR                            | 1 | Multi-centre  | Ondansetron, Tropisetron, Granisetron           | Vomiting                              |
| Levitt, 1993                          | Canada                                                                                        | July 1989 - November 1990     | 8 | Multi-centre  | Ondansetron, Metoclopramide + Steroid           | Nausea, Vomiting                      |
| Madej, 1993                           | Poland                                                                                        | NR                            | 5 | NR            | Metoclopramide, Tropisetron + Steroid           | Nausea, Vomiting                      |
| Rath, 1993                            | France, Germany, Mexico, Norway, Sweden, UK                                                   | NR                            | 5 | Multi-centre  | Ondansetron, Metoclopramide + Steroid           | Nausea, Vomiting                      |
| Smith (Granisetron Study Group), 1993 | Belgium, Switzerland, The Netherlands, France, UK, South Africa.                              | NR                            | 7 | Multi-centre  | Granisetron                                     | Nausea, CINV, Arrhythmia, Mortality   |
| Beck, 1992                            | USA                                                                                           | NR                            | 1 | Multi-centre  | Ondansetron                                     | Vomiting                              |
| Bots, 1992                            | Netherlands                                                                                   | September 1988 - July 1989    | 6 | NR            | Granisetron                                     | CINV                                  |
| Dicato, 1992                          | Norway, Italy, Luxembourg, Austria, Belgium, Portugal, Spain, United Kingdom                  | NR                            | 5 | NR            | Ondansetron                                     | Nausea, Vomiting                      |
| Jantunen, 1992                        | Finland                                                                                       | NR                            | 1 | NR            | Ondansetron + Steroid, Tropisetron + Steroid    | Vomiting                              |
| Seynaeve, 1992                        | Austria, Belgium, Finland, Denmark, Holland, Iceland, Israel, Luxembourg, Spain, UK, Germany. | September 1989 - June 1990    | 1 | Multi-centre  | Ondansetron                                     | Nausea, Vomiting, QT Interval         |
| Sledge, 1992                          | USA                                                                                           | October 1988 - September 1989 | 5 | Single centre | Ondansetron, Metoclopramide                     | Nausea, Vomiting                      |
| Soukop, 1992                          | UK, Ireland                                                                                   | NR                            | 5 | Multi-centre  | Ondansetron + Steroid, Metoclopramide + Steroid | Nausea, Vomiting                      |
| Gandara, 1991                         | USA                                                                                           | NR                            | 1 | Multi-centre  | Ondansetron, Metoclopramide                     | Vomiting                              |
| Hainsworth, 1991                      | USA                                                                                           | June 1988 - June 1989         | 1 | Multi-centre  | Ondansetron, Metoclopramide                     | Nausea, Vomiting, CINV                |
| Jones, 1991                           | UK, Ireland                                                                                   | NR                            | 5 | NR            | Ondansetron, Dexamethasone                      | Nausea, Vomiting, Delirium            |
| Marschner, 1991                       | Germany                                                                                       | NR                            | 3 | Multi-centre  | Ondansetron, Metoclopramide                     | Nausea, Vomiting                      |
| Roila, 1991                           | Italy                                                                                         | June 1989- November 1989      | 1 | Multi-centre  | Ondansetron, Ondansetron + Steroid              | Nausea, Vomiting, CINV                |
| Smith, 1991                           | UK                                                                                            | NR                            | 8 | NR            | Ondansetron, Ondansetron + Steroid              | Nausea, Vomiting, Mortality           |
| Smyth, 1991                           | UK, Germany                                                                                   | NR                            | 1 | Multi-centre  | Ondansetron, Ondansetron + Steroid              | Nausea, Vomiting, Mortality           |
| Warr, 1991                            | Canada                                                                                        | April 1988 - March 1989       | 1 | Multi-centre  | Granisetron, Prochlorperazine + Steroid         | Nausea, Vomiting, Delirium            |
| Bonnetterre, 1990                     | France                                                                                        | NR                            | 3 | NR            | Ondansetron, Metoclopramide                     | Nausea, Vomiting                      |
| Cubeddu, 1990a                        | Venezuela                                                                                     | NR                            | 4 | Single centre | Ondansetron, Placebo                            | Nausea, Vomiting                      |
| Cubeddu, 1990b                        | Venezuela                                                                                     | NR                            | 4 | Single centre | Ondansetron, Placebo                            | Nausea, Vomiting                      |
| Cupissol, 1990                        | France                                                                                        | NR                            | 1 | Single centre | Granisetron, Placebo                            | Nausea, Vomiting, CINV, Mortality     |
| De Mulder, 1990                       | The Netherlands                                                                               | May 1988 -February 1989       | 6 | Multi-centre  | Ondansetron, Metoclopramide                     | Nausea, Vomiting, Delirium, Mortality |
| Falkson, 1990                         | South Africa                                                                                  | NR                            | 1 | NR            | Granisetron                                     | Vomiting                              |
| Kaasa, 1990                           | Norway, Luxembourg,                                                                           | NR                            | 3 | NR            | Ondansetron, Metoclopramide                     | Nausea, Vomiting, Delirium            |

|                                              |                                           |                                   |                   |               |                                                                                                                        |                                                      |
|----------------------------------------------|-------------------------------------------|-----------------------------------|-------------------|---------------|------------------------------------------------------------------------------------------------------------------------|------------------------------------------------------|
|                                              | Belgium, UK                               |                                   |                   |               |                                                                                                                        |                                                      |
| Khojasteh, 1990                              | USA                                       | NR                                | 1                 | Multi-centre  | Ondansetron                                                                                                            | Nausea, Vomiting                                     |
| Marty, 1990a                                 | France, Germany, UK, Switzerland, Belgium | NR                                | 7                 | Single centre | Granisetron, Chlorpromazine + Steroid                                                                                  | Nausea, Vomiting, CINV                               |
| Marty, 1990b                                 | France, UK                                | NR                                | 7                 | Multi-centre  | Ondansetron, Metoclopramide                                                                                            | Nausea, Vomiting                                     |
| <i>Non-Randomized Clinical Trials (n=33)</i> |                                           |                                   |                   |               |                                                                                                                        |                                                      |
| Gabrail, 2015(a)                             | USA                                       | NR                                | 7                 | NR            | Granisetron                                                                                                            |                                                      |
| Kim, 2014                                    | Korea                                     | September 2010 - October 2011     | 7                 | Multi-centre  | Ramosetron + Steroid, Tropisetron                                                                                      |                                                      |
| Abali, 2007                                  | Turkey                                    | NR                                | 5                 | Single centre | Granisetron + Steroid, Ondansetron + Steroid, Tropisetron + Steroid                                                    | Nausea, Vomiting                                     |
| Tan, 2004                                    | USA                                       | February 1, 2001 - March 31, 2001 | 1                 | Single centre | Dolasetron + Steroid, Granisetron + Steroid                                                                            | Nausea, Vomiting, CINV                               |
| Carmichael, 2003                             | UK                                        | NR                                | 2                 | NR            | Granisetron                                                                                                            | Arrhythmia, Delirium                                 |
| Raynov, 2002                                 | Bulgaria                                  | NR                                | NR [3 cycles]     | Single centre | Ondansetron, Ondansetron + Steroid, Metoclopramide, Metoclopramide + Steroid                                           | CINV                                                 |
| Yamac, 2002                                  | Turkey                                    | NR                                | NR                | NR            | Granisetron, Ondansetron, Tropisetron                                                                                  | CINV                                                 |
| Liaw, 2001                                   | Taiwan                                    | December 1995 to July 2000        | 6                 | Single centre | Ondansetron + Steroid                                                                                                  | Nausea, Vomiting                                     |
| Watters, 2001                                | UK                                        | NR                                | 7                 | Single centre | Granisetron + Steroid + Metoclopramide, Ondansetron + Steroid + Metoclopramide, Tropisetron + Steroid + Metoclopramide | Nausea, Vomiting                                     |
| Zeng, 2001                                   | China                                     | August 2000 - October 2000        | 1                 | NR            | Ramosetron, Tropisetron                                                                                                | Nausea, Vomiting                                     |
| Coppes, 1999a                                | Canada                                    | NR                                | 1                 | Multi-centre  | Dolasetron                                                                                                             | Vomiting, Mortality, Arrhythmia, QT Interval         |
| Coppes, 1999b                                | Canada, USA                               | NR                                | 1                 | Multi-centre  | Dolasetron                                                                                                             | Vomiting, Mortality, Arrhythmia, QT Interval         |
| Tsavaris, 1999                               | Greece                                    | NR                                | 3                 | NR            | Ondansetron + Steroid, Metoclopramide + Steroid                                                                        | Vomiting                                             |
| Kris, 1998                                   | USA                                       | December 1986-October 1987        | 1                 | NR            | Ondansetron                                                                                                            | Nausea, Mortality                                    |
| Chang, 1997                                  | China                                     | NR                                | 7                 | Single centre | Granisetron, Metoclopramide + Steroid                                                                                  | CINV                                                 |
| Belkacemi, 1996                              | France                                    | March 1992 - February 1994        | less than one day | Multi-centre  | Granisetron                                                                                                            | CINV                                                 |
| Gaedicke, 1996                               | Germany, Switzerland                      | NR                                | 7                 | Multi-centre  | Tropisetron                                                                                                            | Nausea, Vomiting, CINV                               |
| Hesketh, 1996a                               | USA                                       | NR                                | 2                 | Multi-centre  | Dolasetron                                                                                                             | Nausea, Vomiting, QT Interval                        |
| Hesketh, 1995                                | USA                                       | NR                                | 1                 | Multi-centre  | Ondansetron + Steroid                                                                                                  | Nausea, Vomiting                                     |
| Conroy, 1994                                 | France, Germany, The Netherlands          | August 1989 - August 1991         | 1                 | Multi-centre  | Dolasetron                                                                                                             | Nausea, Vomiting                                     |
| Kris, 1994                                   | USA                                       | February 1991 - March 1992        | 1                 | Multi-centre  | Dolasetron                                                                                                             | Nausea, Vomiting, Arrhythmia, Mortality, QT interval |

|                  |                      |                              |    |               |                                    |                                         |
|------------------|----------------------|------------------------------|----|---------------|------------------------------------|-----------------------------------------|
| Merrouche, 1994  | France               | NR                           | 5  | NR            | Dolasetron                         | Nausea, Vomiting                        |
| de Wet, 1993     | South Africa         | NR                           | 1  | NR            | Granisetron                        | CINV                                    |
| Pisters, 1993    | USA                  | March 1988 - August 1988     | 1  | NR            | Tropisetron                        | Nausea, Vomiting, Mortality             |
| Ribiero, 1993    | Portugal             | NR                           | 5  | Multi-centre  | Ondansetron                        | Nausea, Vomiting                        |
| Dundee, 1992     | Northern Ireland     | NR                           | 5  | Single centre | Ondansetron, Placebo               | CINV                                    |
| Fraschini, 1991  | USA                  | October 1988 - December 1989 | 2  | NR            | Ondansetron                        | Nausea, Vomiting                        |
| Lemerle, 1991    | France               | NR                           | 1  | Single centre | Granisetron                        | CINV, Arrhythmia                        |
| Seynaeve, 1991   | The Netherlands, UK. | NR                           | 5  | NR            | Ondansetron                        | Nausea, Vomiting, QT Interval           |
| Addelman, 1990   | Canada               | NR                           | NR | NR            | Granisetron                        | Nausea, Vomiting, Arrhythmia, Mortality |
| Cunningham, 1989 | UK                   | NR                           | 7  | NR            | Ondansetron, Ondansetron + Steroid | Nausea, Vomiting, CINV                  |
| Grunberg, 1989   | USA                  | NR                           | 1  | NR            | Ondansetron                        | Nausea, Vomiting                        |
| De Hann, 1988    | The Netherlands      | NR                           | 1  | NR            | Ondansetron                        | Nausea, Vomiting                        |

*Cohort Studies (n=19)*

|                    |          |                                                                                                   |    |               |                                                                    |                        |
|--------------------|----------|---------------------------------------------------------------------------------------------------|----|---------------|--------------------------------------------------------------------|------------------------|
| Anvari, 2015       | Iran     | June 2009 - July 2010                                                                             | 7  | Multi-centre  | Metoclopramide + Steroid, Granisetron + Steroid                    |                        |
| Zoto, 2015         | Turkey   | NR                                                                                                | 5  | Single centre | Granisetron + Steroid, Ondansetron + Steroid                       |                        |
| Murakami, 2014     | Japan    | July 2010 - November 2012                                                                         | 5  | Single centre | Granisetron + Steroid, Palonosetron + Steroid                      |                        |
| Keat, 2013         | Malaysia | September 2011 - December 2011                                                                    | 5  | Single centre | Granisetron + Metoclopramide + Steroid, Metoclopramide + Steroid   |                        |
| Blazer, 2012       | USA      | January 2009 – June 2009 for ondansetron group; April 2010 – November 2010 for palonsetron group. | 5  | Single centre | Ondansetron + Steroid, Palonosetron + Steroid                      | CINV                   |
| Pielichowski, 2011 | Poland   | NR                                                                                                | 5  | Single centre | Ondansetron + Steroid, Palonosetron + Steroid                      | CINV                   |
| Taguchi, 2009      | Japan    | January 2007 - December 2007                                                                      | 4  | Multi-centre  | Granisetron + Steroid                                              | Vomiting, Nausea       |
| Carreca, 2007*     | NR       | NR                                                                                                | NR | NR            | Palonosetron + Steroid, Ondansetron + Steroid                      | CINV                   |
| Hamadani, 2007     | USA      | NR                                                                                                | 1  | Single centre | Dolasetron + Steroid, Granisetron + Steroid, Ondansetron + Steroid | Nausea, Vomiting       |
| Adel, 2006 *       | USA      | January 2005 - December 2005                                                                      | 12 | Single centre | Palonosetron, Palonosetron + Steroid                               | Nausea, Vomiting       |
| Shikimori, 2006    | Japan    | NR                                                                                                | NR | Single centre | Granisetron, Metoclopramide                                        | CINV                   |
| Trifilio, 2006*    | USA      | NR                                                                                                | 7  | NR            | Palonosetron, Ondansetron                                          | Nausea, Vomiting       |
| Babaoglu, 2005     | Turkey   | April 2002 - October 2004                                                                         | 5  | Single centre | Granisetron, Ondansetron, Tropisetron                              | CINV                   |
| Dempsey, 2004      | USA      | January 1998 - June 2002                                                                          | 3  | Multi-centre  | Granisetron + Steroid,                                             | Nausea, Vomiting, CINV |

|                                                                                                                                                        |        |                                                                     |            |              |                                                                        |                        |
|--------------------------------------------------------------------------------------------------------------------------------------------------------|--------|---------------------------------------------------------------------|------------|--------------|------------------------------------------------------------------------|------------------------|
|                                                                                                                                                        |        |                                                                     |            |              | Ondansetron + Steroid                                                  |                        |
| Steiner, 2003                                                                                                                                          | USA    | pre and post November 2000                                          | 3          | NR           | Granisetron + Steroid, Dolasetron + Steroid                            | CINV                   |
| Brown, 1998                                                                                                                                            | UK     | December 1993 - June 1996                                           | 392 to 469 | NR           | Granisetron + Steroid + Metoclopramide, Metoclopramide + Steroid       | Vomiting               |
| Farley, 1997                                                                                                                                           | USA    | June 1995 - November 1995                                           | 3          | Multi-centre | Granisetron, Ondansetron                                               | Nausea, Vomiting, CINV |
| Harris, 1997                                                                                                                                           | USA    | NR                                                                  | 3          | Multi-centre | Granisetron, Granisetron + Steroid, Ondansetron, Ondansetron + Steroid | Vomiting, CINV         |
| Blijham, 1992                                                                                                                                          | NR     | Study 1: April 1988 and June 1989; Study 2: from July 1989-May 1991 | 1          | NR           | Granisetron                                                            | CINV                   |
| <b><i>Controlled Before and After Study (n=1)</i></b>                                                                                                  |        |                                                                     |            |              |                                                                        |                        |
| Rzepecki, 2009                                                                                                                                         | Poland | NR                                                                  | 5          | NR           | Ondansetron + Steroid, Palonosetron + Steroid                          | CINV                   |
| <b>Abbreviations:</b> CINV – chemotherapy-induced nausea and vomiting; NR - not reported; UK - United Kingdom; USA - United States of America          |        |                                                                     |            |              |                                                                        |                        |
| * Includes unpublished data (Adel 2006, Tabei 2006, Trifilio 2006, Carreca 2007, Kadota 2007, Piyush 2011); full citations are provided in Appendix A. |        |                                                                     |            |              |                                                                        |                        |

## Appendix C. Patient Characteristics

| Author, year                                | Age Category             | Sample Size | % female | Cancer Diagnosis                                                                                                                                                | Use of CDDP | Treatment Details    | H/o motion sickness | H/o CINV | Co-morbidities |
|---------------------------------------------|--------------------------|-------------|----------|-----------------------------------------------------------------------------------------------------------------------------------------------------------------|-------------|----------------------|---------------------|----------|----------------|
| <i>Randomized Controlled Trials (n=246)</i> |                          |             |          |                                                                                                                                                                 |             |                      |                     |          |                |
| Kovacs, 2016                                | Children (≤18)           | 331         | 46.86    | Acute lymphocytic Leukaemia, Nephroblastoma, Rhabdomyosarcoma, Medulloblastoma, B precursor type acute leukaemia, Ewings sarcoma, Hodgkin's disease             | NO          | NR                   | NR                  | NR       | NR             |
| Gabraïl, 2015(b)                            | Adults (18-65)           | 35          | 100      | Ovarian, breast, lung, lymphoma/leukemia, endometrial/cervical/vulvar, colorectal, bladder                                                                      | Partial     | NR                   | NR                  | NR       | NR             |
| Karthaus, 2015                              | Adults & Elderly (18-99) | 739         | 41       | Gastric, Head and neck, Lung/respiratory tract, Ovarian, Bladder, Others                                                                                        | NO          | NR                   | NR                  | NR       | NR             |
| Kim K, 2015                                 | Adults & Elderly (18-99) | 32          | 34       | Colon cancer stage III and IV                                                                                                                                   | NO          | NR                   | NR                  | NR       | NR             |
| Kim JE, 2015                                | Adults & Elderly (18-99) | 261         | 37.5     | Gastrointestinal, Lung, Others                                                                                                                                  | NO          | NR                   | NR                  | NR       | NR             |
| Kimura, 2015                                | Adults & Elderly (18-99) | 24          | 50       | Osteosarcoma, Malignant fibrous histiosarcoma, Synovial sarcoma, Leiomyosarcoma, Rhabdomyosarcoma, De-differentiated liposarcoma and pleomorphic sarcoma, MYLPS | NO          | NR                   | NR                  | NR       | NR             |
| Ohzawa, 2015                                | Adults & Elderly (18-99) | 40          | 100      | Breast                                                                                                                                                          | NO          | Adjuvant/Neoadjuvant | NR                  | NR       | NR             |
| Raftopolous, 2015                           | Adults & Elderly (18-99) | 1395        | 74.6     | Lung, Breast, Ovarian, Lymphoma                                                                                                                                 | NO          | NR                   | NR                  | NR       | NR             |
| Sanmukhani, 2014                            | Adults & Elderly (18-99) | 214         | 65.9     | Breast, Head and Neck, Ovary, Lung and bronchus, Gastrointestinal tract, Hematopoietic system, Musculoskeletal system                                           | NO          | NR                   | NR                  | NR       | NR             |
| Huang, 2013                                 | Adults & Elderly (18-99) | 236         | 73.3     | Non-small cell lung, Colorectal, Gastric, Breast, Esophageal, Head and Neck, Ovarian                                                                            | NO          | NR                   | NR                  | NR       | NR             |
| Wenzell, 2013                               | Adults & Elderly (18-99) | 40          | 100      | Breast, Lymphoma                                                                                                                                                | NO          | NR                   | YES                 | NR       | NR             |
| Boccia, 2013                                | Adults & Elderly (18-99) | 639         | 73.1     | Breast, Colon, Lung                                                                                                                                             | NO          | NR                   | NR                  | YES      | NR             |
| Endo, 2012                                  | Adults & Elderly (18-99) | 105         | 14.1     | Lung, Respiratory                                                                                                                                               | NO          | NR                   | NR                  | NR       | NR             |
| Ithimakin, 2012                             | Adults & Elderly (18-99) | 162         | 27.0     | Head and Neck, Lung, Sarcoma, Gastrointestinal, Other                                                                                                           | YES         | Radiotherapy         | YES                 | NR       | NR             |
| Noor, 2012                                  | Adults (18-65)           | 30          | 36.4     | Melanoma                                                                                                                                                        | YES         | NR                   | NR                  | NR       | NR             |



|                           |                          |      |      |                                                                                                    |         |    |     |     |    |
|---------------------------|--------------------------|------|------|----------------------------------------------------------------------------------------------------|---------|----|-----|-----|----|
| Roscoe, 2012              | Adults & Elderly (18-99) | 944  | 80.0 | Gastrointestinal, Breast, Gastrointestinal, Genitourinary, Gynecologic, Head And Neck, Hematologic | Partial | NR | YES | NR  | NR |
| Tsuji, 2012               | Adults & Elderly (18-99) | 359  | 54.9 | Gastrointestinal, Breast, Lung, Other                                                              | YES     | NR | NR  | NR  | NR |
| Boccia, 2011              | Adults & Elderly (18-99) | 621  | 51.5 | NR                                                                                                 | YES     | NR | NR  | NR  | NR |
| Dong, 2011                | Adults & Elderly (18-99) | 89   | 36.0 | NR                                                                                                 | YES     | NR | NR  | YES | NR |
| Giralt, 2011              | Adults & Elderly (18-99) | 73   | 35.6 | Hematological                                                                                      | NO      | NR | NR  | YES | NR |
| Piyush, 2011*             | NR                       | 90   | NR   | Head and Neck                                                                                      | YES     | NR | NR  | NR  | NR |
| Siddique, 2011            | Children ( $\leq 18$ )   | 60   | NR   | Hematological                                                                                      | NO      | NR | NR  | NR  | NR |
| Tian, 2011                | Adults & Elderly (18-99) | 144  | 39.6 | Lung, Breast, Gastrointestinal                                                                     | YES     | NR | NR  | YES | NR |
| Ghosh, 2010               | Adults (18-65)           | 1213 | 54.2 | NR                                                                                                 | NR      | NR | NR  | NR  | NR |
| Ho, 2010                  | Adults & Elderly (18-99) | 285  | 61.4 | Breast, Lung, Head and Neck, Gastrointestinal, Genitourinary                                       | YES     | NR | NR  | NR  | NR |
| Kaushal, 2010             | Adults (18-65)           | 30   | NR   | Head and Neck                                                                                      | NO      | NR | NR  | NR  | NR |
| Mattiuzzi, 2010           | Adults & Elderly (18-99) | 143  | 47.6 | Hematological                                                                                      | NO      | NR | NR  | YES | NR |
| Keyhanian, 2009           | Adults & Elderly (18-99) | 138  | 63.2 | Gastrointestinal, Breast, Hematological                                                            | Partial | NR | NR  | NR  | NR |
| Maemondo, 2009            | Adults & Elderly (18-99) | 231  | 26.8 | Lung, Other                                                                                        | YES     | NR | NR  | NR  | NR |
| Saito, 2009               | Adults & Elderly (18-99) | 1114 | 58.3 | Lung, Breast, Other                                                                                | Partial | NR | NR  | NR  | NR |
| Segawa, 2009              | Adults & Elderly (18-99) | 204  | 56.9 | Lung, Breast, Lung, Other                                                                          | NO      | NR | NR  | NR  | NR |
| Yonemura, 2009            | Adults & Elderly (18-99) | 179  | 97.2 | Breast, Gynecological, Genitourinary, Sarcoma, Unknown/Other                                       | NO      | NR | NR  | NR  | NR |
| Yu, 2009                  | Adults (18-65)           | 208  | 36.5 | Lung, Gastrointestinal, Breast, Head and Neck, Other                                               | YES     | NR | NR  | NR  | NR |
| Chen, 2008                | All groups               | 424  | 36.0 | Lung, Breast, Head and Neck, Genitourinary, Gastrointestinal, Other                                | YES     | NR | NR  | NR  | NR |
| Fabi, 2008                | Adults & Elderly (18-99) | 89   | 85.5 | Breast, Lung, Gynecological, Other                                                                 | NO      | NR | NR  | NR  | NR |
| Nagel, 2008               | Children ( $\leq 18$ )   | 25   | 48.0 | NR                                                                                                 | NO      | NR | NR  | NR  | NR |
| Sepúlveda-Vildósola, 2008 | Children ( $\leq 18$ )   | 100  | 31.3 | Sarcoma, Nervous System, Optic                                                                     | Partial | NR | YES | YES | NR |

|                     |                             |     |       |                                                                              |         |              |    |     |    |
|---------------------|-----------------------------|-----|-------|------------------------------------------------------------------------------|---------|--------------|----|-----|----|
| Berrak, 2007        | Adults & Children (0 - <65) | 18  | 27.8  | Optic                                                                        | NO      | NR           | NR | NR  | NR |
| Herrstedt, 2007     | Adults (18-65)              | 82  | 7.0   | NR                                                                           | YES     | NR           | NR | NR  | NR |
| Kadota, 2007*       | Children ( $\leq 18$ )      | 60  | NR    | NR                                                                           | NR      | NR           | NR | NR  | NR |
| Pectasides, 2007    | Adults & Elderly (18-99)    | 134 | 100.0 | Breast                                                                       | NO      | NR           | NR | NR  | NR |
| Shi, 2007           | Adults & Elderly (18-99)    | 50  | 52.0  | Lung, Breast, Gastrointestinal, Nervous System, Sarcoma, Head and Neck       | Partial | NR           | NR | NR  | NR |
| Aapro, 2006         | Adults & Elderly (18-99)    | 667 | 51.1  | Gynecologic, Lung, Hematological, Gastrointestinal, Breast                   | YES     | NR           | NR | NR  | NR |
| Pinarli, 2006       | Adults & Children (0 - <65) | 38  | 47.4  | Sarcoma, Nervous System, Hematological, Germ Cell Tumor, Genitourinary       | NO      | NR           | NR | NR  | NR |
| Tabei, 2006†        | NR                          | 204 | 56.9  | NR                                                                           | NO      | NR           | NR | NR  | NR |
| Buyukavci, 2005     | Children ( $\leq 18$ )      | 22  | 13.6  | Hematological                                                                | NO      | NR           | NR | NR  | NR |
| Cheirsilpa, 2005    | Adults & Elderly (18-99)    | 73  | 50.7  | Head and Neck, Gynecological, Lung, Gastrointestinal, Genitourinary          | YES     | NR           | NR | NR  | NR |
| Corapcioglu, 2005   | Children ( $\leq 18$ )      | 22  | 50.0  | NR                                                                           | Partial | NR           | NR | NR  | NR |
| Kurnianda, 2005     | Adults (18-65)              | 39  | 21.0  | Head and Neck, Lung, Head and Neck, Gynecological, Genitourinary             | YES     | NR           | NR | YES | NR |
| Lindley, 2005       | Adults & Elderly (18-99)    | 232 | 72.8  | Breast, Lung, Hematological, Gynecological, Head and Neck, Genitourinary     | YES     | NR           | NR | NR  | NR |
| Mandanias, 2005     | Adults & Elderly (18-99)    | 197 | 66.5  | Breast                                                                       | NO      | NR           | NR | NR  | NR |
| Yano, 2005          | Adults & Elderly (18-99)    | 39  | 35.9  | Nervous System                                                               | NO      | Radiotherapy | NR | NR  | NR |
| Eisenberg, 2004     | Adults & Elderly (18-99)    | 161 | 20.0  | NR                                                                           | YES     | NR           | NR | NR  | NR |
| Jaing, 2004         | Children ( $\leq 18$ )      | 66  | 36.4  | Hematological                                                                | NO      | NR           | NR | NR  | NR |
| Kim, 2004           | Adults & Elderly (18-99)    | 105 | 37.0  | Lung, Gastrointestinal, Gynecological, Head and Neck, Other                  | YES     | NR           | NR | NR  | NR |
| Tantipalakorn, 2004 | Adults (18-65)              | 109 | 100.0 | Gynecologic                                                                  | YES     | NR           | NR | NR  | NR |
| Villalon, 2004      | Adults & Elderly (18-99)    | 283 | 43.5  | Head and Neck, Lung, Gynecological, Other                                    | YES     | NR           | NR | NR  | NR |
| Aapro, 2003         | Adults & Elderly (18-99)    | 267 | 64.3  | Breast, Lung, Gastrointestinal, Genitourinary, Gynaecological, Head and Neck | Partial | NR           | NR | NR  | NR |
| Bhatia, 2003        | Adults (18-65)              | 80  | 51.3  | Head and Neck, Gynecological, Other                                          | YES     | NR           | NR | NR  | NR |
| Eisenberg, 2003     | Adults (18-65)              | 569 | 82.1  | Breast, Lung, Hematological, ,                                               | Partial | NR           | NR | NR  | NR |

|                  |                              |     |       |                                                                                                   |         |                           |     |     |    |
|------------------|------------------------------|-----|-------|---------------------------------------------------------------------------------------------------|---------|---------------------------|-----|-----|----|
| Gralla, 2003     | Adults & Elderly (18-99)     | 563 | 72.1  | Breast , Lung, Gentiourinary, Gastrointestinal                                                    | Partial | NR                        | NR  | NR  | NR |
| Koizumi, 2003    | Adults & Elderly (18-99)     | 30  | 23.3  | Gastrointestinal                                                                                  | YES     | NR                        | NR  | NR  | NR |
| Matsuoka, 2003   | Adults & Children (0 to <65) | 50  | 36.0  | Hematological, Germ Cell Cancer                                                                   | NO      | Radiotherapy              | NR  | NR  | NR |
| Sagae, 2003      | Adults (18-65)               | 138 | 100.0 | Gynecologic                                                                                       | Partial | NR                        | NR  | NR  | NR |
| Feng, 2002a      | Adults & Elderly (18-99)     | 73  | 37.0  | Lung, Hematological, Breast, Gastrointestinal, Genitourinary, Mediastinum (Cancer Of), Other      | Partial | NR                        | NR  | NR  | NR |
| Feng, 2002b      | All groups                   | 111 | 34.7  | Lung, Breast, Hematological, Gastrointestinal, Head and Neck, Osteosarcoma, Other                 | Partial | NR                        | NR  | NR  | NR |
| Kang, 2002       | Adults & Elderly (18-99)     | 194 | 28.4  | Gastrointestinal, Other                                                                           | YES     | NR                        | NR  | NR  | NR |
| Noda, 2002       | Adults & Elderly (18-99)     | 136 | 55.2  | Lung, Gynecological, Gentiourinary, Gastrointestinal                                              | YES     | NR                        | NR  | NR  | NR |
| Noda, 2002       | Adults & Elderly (18-99)     | 84  | 46.4  | Lung, Gastrointestinal, Gentiourinary, Gynecological                                              | YES     | NR                        | NR  | YES | NR |
| Aksoylar, 2001   | Children (≤18)               | 51  | 37.3  | Hematological, Sarcoma, Nervous System, Gentiourinary                                             | NR      | NR                        | NR  | NR  | NR |
| de Wit, 2001     | Adults & Elderly (18-99)     | 40  | 90.0  | Breast, Gynecological, Lung                                                                       | Partial | NR                        | NR  | NR  | NR |
| Fox-Geiman, 2001 | Adults (18-65)               | 102 | 71.6  | NR                                                                                                | NO      | NR                        | YES | YES | NR |
| Koralewski, 2001 | Adults & Elderly (18-99)     | 76  | 65.8  | Breast, Gastrointestinal, Hematological, Lung                                                     | NO      | NR                        | NR  | NR  | NR |
| Ozgur Tan, 2001  | Adults & Elderly (18-99)     | 25  | 0.0   | Genitourinary                                                                                     | YES     | NR                        | NR  | NR  | NR |
| Parker, 2001     | Children (≤18)               | 26  | 53.8  | Hematological                                                                                     | NO      | NR                        | NR  | NR  | NR |
| Tsavaris, 2001a  | Adults & Elderly (18-99)     | 106 | 13.2  | Lung                                                                                              | YES     | NR                        | NR  | NR  | NR |
| Tsavaris, 2001b  | Adults & Elderly (18-99)     | 100 | 0.0   | Lung                                                                                              | YES     | NR                        | NR  | NR  | NR |
| Abang, 2000      | Adults & Elderly (18-99)     | 60  | 65.0  | Hematological, Breast                                                                             | NR      | NR                        | NR  | NR  | NR |
| Barrajon, 2000   | Adults & Elderly (18-99)     | 120 | 67.5  | Breast, Lung, Head and Neck, Gynecological, Gastrointestinal, Other                               | Partial | NR                        | NR  | NR  | NR |
| Chiou, 2000      | All groups                   | 51  | 37.3  | Hematological, Unkown Pimary, Gentiourinary, Gastrointestinal, Breast, Lung (Nscl), Head And Neck | Partial | NR                        | NR  | NR  | NR |
| Chua, 2000       | Adults & Elderly (18-99)     | 89  | 13.5  | Head and Neck                                                                                     | YES     | Adjuvant/<br>Radiotherapy | NR  | NR  | NR |

|                                                         |                             |     |       |                                                                                                   |         |                           |     |     |    |
|---------------------------------------------------------|-----------------------------|-----|-------|---------------------------------------------------------------------------------------------------|---------|---------------------------|-----|-----|----|
| Fauser , 2000                                           | Aduts (18-65)               | 210 | 20.5  | Genitourinary, Lung, Head and Neck, Gynecological, Gastrointestinal, Breast, Lymphoma             | YES     | NR                        | NR  | NR  | NR |
| Forni, 2000                                             | Adults & Children (0 - <65) | 90  | 31.1  | Sarcoma                                                                                           | YES     | NR                        | NR  | NR  | NR |
| Friedman, 2000                                          | Adults & Elderly (18-99)    | 230 | 80.9  | Breast                                                                                            | Partial | NR                        | NR  | NR  | NR |
| Herrington, 2000                                        | Adults & Elderly (18-99)    | 61  | 75.4  | Breast, Hematological, Other                                                                      | YES     | NR                        | NR  | NR  | NR |
| Hesketh, 2000                                           | Adults & Elderly (18-99)    | 97  | 86.0  | NR                                                                                                | NO      | NR                        | NR  | NR  | NR |
| Koenig, 2000                                            | Adults (18-65)              | 40  | 55.0  | Gastrointestinal                                                                                  | NO      | NR                        | NR  | NR  | NR |
| Oge, 2000                                               | Adults (18-65)              | 106 | 35.9  | Lung, Head and Neck, Gynecological, Genitourinary                                                 | YES     | NR                        | NR  | NR  | NR |
| Raynov, 2000                                            | Adults (18-65)              | 72  | 11.1  | Lung, Genitourinary, Gynecological, Head and Neck                                                 | Partial | NR                        | NR  | NR  | NR |
| Roila [The Italian Group for Antiemetic Research], 2000 | Adults & Elderly (18-99)    | 708 | 94.6  | Breast, Other                                                                                     | NO      | NR                        | YES | NR  | NR |
| Slaby, 2000                                             | Adults (18-65)              | 45  | 33.3  | Hematological                                                                                     | NO      | NR                        | NR  | YES | NR |
| Stewart, 2000                                           | Adults & Elderly (18-99)    | 16  | 0.6   | NR                                                                                                | YES     | NR                        | NR  | NR  | NR |
| White, 2000                                             | Children (≤18)              | 428 | 41.6  | Hematological, Sarcoma, Nervous System                                                            | Partial | NR                        | YES | NR  | NR |
| Davidson, 1999                                          | Adults & Elderly (18-99)    | 427 | 84.8  | Breast, Hematological, Lung, Gynecological, Gastrointestinal, Bone And Soft Tissue, Gentrourinary | NO      | NR                        | NR  | NR  | NR |
| Kandemir, 1999                                          | Adults & Elderly (18-99)    | 89  | 57.3  | Lung, Head and Neck, Gynecological, Genitourinary                                                 | YES     | NR                        | NR  | NR  | NR |
| Komada, 1999                                            | Children (≤18)              | 36  | 55.6  | Hematological                                                                                     | NO      | NR                        | NR  | NR  | NR |
| Lazarus, 1999                                           | Adults (18-65)              | 43  | 47.0  | Breast, Hematological, Gentiourinary                                                              | YES     | NR                        | NR  | NR  | NR |
| Needles, 1999                                           | All groups                  | 357 | 32.2  | Lung, Head and Neck, Gynecological, Gastrointestinal, Genitourinary, Other                        | YES     | NR                        | NR  | NR  | NR |
| Orchard, 1999                                           | Adults & Children (0 - <65) | 187 | 42.8  | Hematological, Breast                                                                             | NR      | Radiotherapy              | NR  | NR  | NR |
| Raynov, 1999                                            | Adults & Elderly (18-99)    | 35  | 40.0  | Lung, Genitourinary, Gynecological                                                                | YES     | NR                        | NR  | NR  | NR |
| Sandoval, 1999                                          | Children (≤18)              | 31  | 48.4  | Hematological, Nervous System                                                                     | Partial | NR                        | NR  | NR  | NR |
| Sigsgaard, 1999                                         | Adults & Elderly (18-99)    | 223 | 100.0 | Breast                                                                                            | NO      | Adjuvant/<br>Radiotherapy | NR  | NR  | NR |

|                                           |                          |      |       |                                                                            |         |                           |     |     |    |
|-------------------------------------------|--------------------------|------|-------|----------------------------------------------------------------------------|---------|---------------------------|-----|-----|----|
| Stiakaki, 1999                            | Children (≤18)           | 23   | 18.2  | Nervous System, Genitourinary, Hematological, Gynecological, Sarcoma       | NO      | NR                        | NR  | NR  | NR |
| Tatsumi, 1999                             | Adults (18-65)           | 186  | 37.1  | Hematological                                                              | NO      | NR                        | NR  | NR  | NR |
| The Italian Multicenter Study Group, 1999 | Adults & Elderly (18-99) | 532  | 33.5  | Lung, Other                                                                | YES     | NR                        | NR  | NR  | NR |
| Tsuchida, 1999                            | Children (≤18)           | 44   | 47.7  | Nervous System, Gastrointestinal, Sarcoma, Optic                           | Partial | NR                        | NR  | NR  | NR |
| Uchida, 1999                              | Adults & Elderly (18-99) | 29   | 24.1  | Genitourinary                                                              | YES     | NR                        | NR  | NR  | NR |
| Yalcin, 1999                              | Adults & Elderly (18-99) | 54   | 98.2  | Breast                                                                     | NO      | NR                        | NR  | NR  | NR |
| Birch, 1998                               | Adults (18-65)           | 70   | 100.0 | Breast                                                                     | NO      | Adjuvant                  | NR  | NR  | NR |
| Gralla, 1998                              | Adults & Elderly (18-99) | 1054 | 34.4  | Lung, Genitourinary, Head and Neck, Unknown/Other                          | YES     | NR                        | NR  | NR  | NR |
| Handberg, 1998                            | Adults & Elderly (18-99) | 90   | 93.3  | Gynecologic, Lung, Genitourinary, Other                                    | YES     | NR                        | NR  | NR  | NR |
| Kalaycio, 1998                            | Adults (18-65)           | 45   | 100.0 | Breast                                                                     | NO      | Adjuvant                  | NR  | YES | NR |
| Kleisbauer, 1998                          | Adults & Elderly (18-99) | 308  | 17.5  | Lung, Head and Neck, Gynecological                                         | YES     | NR                        | NR  | NR  | NR |
| Krzakowski, 1998                          | Adults & Elderly (18-99) | 530  | 39.0  | Lung, Gynecological, Head and Neck, Genitourinary, Gastrointestinal, Other | YES     | NR                        | NR  | YES | NR |
| Latreille, 1998                           | Adults (18-65)           | 435  | 60.0  | Lung, Gynecological, Head and Neck, Other                                  | YES     | NR                        | YES | NR  | NR |
| Martoni, 1998                             | Adults & Elderly (18-99) | 198  | 18.0  | Lung, Genitourinary, Other                                                 | Partial | NR                        | NR  | NR  | NR |
| Perez, 1998                               | Adults & Elderly (18-99) | 1085 | 79.8  | Breast, Hematological, Lung/Respiratory                                    | NO      | NR                        | NR  | NR  | NR |
| Perez, 1998                               | Adults & Elderly (18-99) | 573  | 99.7  | Breast                                                                     | NO      | NR                        | NR  | NR  | NR |
| Poon, 1998                                | Adults & Elderly (18-99) | 20   | 100.0 | Breast                                                                     | NO      | Adjuvant/<br>Radiotherapy | NR  | NR  | NR |
| Ritter, 1998                              | Adults & Elderly (18-99) | 393  | 34.0  | NR                                                                         | YES     | NR                        | NR  | NR  | NR |
| Scoponi, 1998                             | Adults & Elderly (18-99) | 134  | 59.7  | Breast, Gastrointestinal, Lung, Hematological, Other                       | NO      | NR                        | NR  | NR  | NR |
| Sorbe, 1998                               | Adults & Elderly (18-99) | 282  | 100.0 | Gynecologic                                                                | Partial | NR                        | YES | NR  | NR |
| Spector, 1998                             | Adults & Elderly (18-99) | 371  | 44.5  | Lung, Gynecological, Genitourinary, Gastrointestinal, Head and Neck, Other | Partial | NR                        | NR  | NR  | NR |

|                                                         |                          |     |       |                                                                                            |         |    |     |     |    |
|---------------------------------------------------------|--------------------------|-----|-------|--------------------------------------------------------------------------------------------|---------|----|-----|-----|----|
| Tsavaris, 1998                                          | Adults & Elderly (18-99) | 104 | 36.5  | Lung, Gynecological, Head and Neck, Genitourinary, Sarcoma, Mesothelioma, Other            | YES     | NR | NR  | NR  | NR |
| Zeidman, 1998                                           | Adults (18-65)           | 58  | 29.3  | Hematological, Gastrointestinal, Gentiourinary                                             | Partial | NR | NR  | NR  | NR |
| Beck, 1997                                              | Adults & Elderly (18-99) | 402 | 90.1  | Breast, Hematological, Lung, Gynecological, Genitourinary, Skin, Other                     | NO      | NR | NR  | NR  | NR |
| Chevallier, 1997                                        | Adults (18-65)           | 226 | 29.2  | Breast, Gastrointestinal, Skin, Genitourinary, Gynecologic, Head And Neck, Musculoskeletal | YES     | NR | NR  | NR  | NR |
| Davidson, 1997                                          | Adults & Elderly (18-99) | 406 | 86.0  | Head and Neck, Lung, Breast, Gastrointestinal, Gynecologic, Haematopoietic/Immunological   | NO      | NR | NR  | NR  | NR |
| du Bois, 1997                                           | Adults (18-65)           | 189 | 100.0 | Gynecologic                                                                                | NO      | NR | Yes | Yes | NR |
| Fumoleau, 1997                                          | Adults (18-65)           | 420 | 22.6  | Lung, Head and Neck, Gastrointestinal, Genitourinary, Other                                | YES     | NR | NR  | NR  | NR |
| Gridelli, 1997                                          | Adults & Elderly (18-99) | 230 | 37.8  | NR                                                                                         | YES     | NR | NR  | NR  | NR |
| Grote, 1997                                             | Adults & Elderly (18-99) | 307 | 46.3  | Gastrointestinal, Gynecological, Head and Neck, Lung, Other                                | Partial | NR | NR  | NR  | NR |
| Kasimis, 1997                                           | Adults & Elderly (18-99) | 30  | 23.0  | Lung, Other                                                                                | YES     | NR | NR  | NR  | NR |
| Kigawa, 1997                                            | Adults & Elderly (18-99) | 85  | 100.0 | Gynecologic                                                                                | YES     | NR | NR  | NR  | NR |
| Kris, 1997                                              | Adults & Elderly (18-99) | 75  | 35.0  | Lung, Gastrointestinal, Head and Neck, Unknown/Other                                       | YES     | NR | NR  | YES | NR |
| Lofters, 1997                                           | Adults & Elderly (18-99) | 696 | 70.5  | Breast, Lung, Gynecological, Other                                                         | Partial | NR | NR  | NR  | NR |
| Mustacchi, 1997                                         | Adults & Elderly (18-99) | 105 | NR    | NR                                                                                         | NR      | NR | NR  | NR  | NR |
| Park, 1997                                              | Adults & Elderly (18-99) | 97  | 42.4  | Head and Neck, Gastrointestinal, Breast, Gynecological, Sarcoma                            | Partial | NR | NR  | NR  | NR |
| Pectasides, 1997                                        | Adults & Elderly (18-99) | 80  | 43.8  | Lung, Gynecological, Gentiourinary, Head and Neck, Melanoma, Other                         | YES     | NR | NR  | NR  | NR |
| Perez, 1997                                             | Adults & Elderly (18-99) | 353 | 41.9  | Lung, Head and Neck, Gynecological                                                         | YES     | NR | NR  | NR  | NR |
| Roila [The Italian Group for Antiemetic Research], 1997 | Adults & Elderly (18-99) | 318 | 35.9  | Gynecologic, Lung, Gentiourinary, Head and Neck, Other                                     | YES     | NR | YES | NR  | NR |
| Rubenstein, 1997                                        | Adults & Elderly (18-99) | 320 | 81.3  | Breast, Lung, Hematological, Other                                                         | NO      | NR | NR  | NR  | NR |
| Advani, 1996                                            | Adults & Elderly (18-99) | 91  | 39.5  | NR                                                                                         | YES     | NR | NR  | NR  | NR |

|                       |                             |     |       |                                                                     |         |              |     |     |    |
|-----------------------|-----------------------------|-----|-------|---------------------------------------------------------------------|---------|--------------|-----|-----|----|
| Audhui, 1996          | Adults & Elderly (18-99)    | 474 | 33.5  | Head and Neck, Lung, Gastrointestinal, Gynecological                | YES     | NR           | NR  | NR  | NR |
| Barrenetxea, 1996     | Adults (18-65)              | NR  | 100.0 | Breast                                                              | NO      | NR           | NR  | NR  | NR |
| Brock, 1996           | Children ( $\leq 18$ )      | 187 | 45.5  | NR                                                                  | Partial | NR           | NR  | NR  | NR |
| Crucitt, 1996         | Adults & Elderly (18-99)    | 133 | 90.2  | Breast, Hematological, Lung                                         | NO      | NR           | NR  | NR  | NR |
| de Wit, 1996          | Adults & Elderly (18-99)    | 20  | 85.0  | Breast, Lung, Hematological                                         | NO      | NR           | NR  | NR  | NR |
| Fausser, 1996a        | Adults & Elderly (18-99)    | 309 | 69.6  | Breast, Hematological, Sarcoma, Lung, Other                         | NO      | NR           | NR  | YES | NR |
| Fausser, 1996b        | Adults & Elderly (18-99)    | 399 | 61.2  | Breast, Lung                                                        | NO      | NR           | NR  | NR  | NR |
| Fujimoto, 1996        | Children ( $\leq 18$ )      | 40  | 45.0  | Nervous System, Optic, Gastrointestinal, Sarcoma                    | Partial | NR           | NR  | YES | NR |
| Hesketh, 1996b        | Adults & Elderly (18-99)    | 609 | 38.1  | Lung, Gastrointestinal, Gynecological, Head and Neck, Other         | YES     | NR           | NR  | YES | NR |
| Jorgensen, 1996       | Adults & Elderly (18-99)    | 100 | 32.0  | Hematological                                                       | NO      | NR           | NR  | NR  | NR |
| Leonardi, 1996        | Adults & Elderly (18-99)    | 118 | 59.0  | Breast, Lung, Hematological, Other,                                 | Partial | NR           | NR  | NR  | NR |
| Martoni, 1996         | Adults & Elderly (18-99)    | 124 | 25.0  | Lung, Genitourinary, Gynecological, Other                           | Partial | NR           | NR  | NR  | NR |
| Massida & Ionta, 1996 | Adults & Elderly (18-99)    | 60  | 100.0 | Breast                                                              | NO      | NR           | YES | NR  | NR |
| Matsui, 1996          | Adults & Elderly (18-99)    | 70  | 22.9  | Lung, Gastrointestinal                                              | YES     | NR           | NR  | NR  | NR |
| Olver, 1996           | Adults & Children (0 - <65) | 604 | 37.8  | Lung, Gynecological, Head and Neck, Gastrointestinal, Genitourinary | YES     | NR           | NR  | NR  | NR |
| Peterson, 1996        | Adults & Elderly (18-99)    | 104 | 100.0 | Gynecologic                                                         | YES     | NR           | YES | NR  | NR |
| Yeilding, 1996        | Adults & Elderly (18-99)    | 62  | 36.0  | NR                                                                  | YES     | NR           | NR  | NR  | NR |
| Adams, 1995           | Adults (18-65)              | 126 | 86.5  | NR                                                                  | NO      | NR           | NR  | NR  | NR |
| Agura, 1995a          | Adults (18-65)              | 30  | 36.7  | Hematological                                                       | NO      | Radiotherapy | NR  | NR  | NR |
| Agura, 1995b          | Adults (18-65)              | 30  | 36.7  | Hematological                                                       | NO      | Radiotherapy | NR  | NR  | NR |
| Alfieri, 1995         | Adults (18-65)              | 28  | 39.0  | NR                                                                  | YES     | NR           | NR  | NR  | NR |
| Alvarez, 1995         | Children ( $\leq 18$ )      | 34  | 42.0  | Sarcoma, CNS, Nervous System                                        | Partial | NR           | NR  | YES | NR |

|                                                 |                          |     |       |                                                                          |         |                          |     |     |     |
|-------------------------------------------------|--------------------------|-----|-------|--------------------------------------------------------------------------|---------|--------------------------|-----|-----|-----|
| Bleiberg, 1995                                  | Adults & Elderly (18-99) | 930 | 87.4  | Breast, Gynecological, Lung, Hematological, Other                        | Partial | NR                       | NR  | NR  | NR  |
| Bonnerterre, 1995                               | Adults & Elderly (18-99) | 150 | 90.0  | NR                                                                       | NO      | Adjuvant/<br>Neoadjuvant | NR  | NR  | NR  |
| Chiou, 1995                                     | Adults & Elderly (18-99) | 40  | 22.5  | Lung, Gastrointestinal, Gentiourinary, Other                             | Partial | NR                       | NR  | NR  | NR  |
| Contu, 1995                                     | Adults & Elderly (18-99) | 120 | 85.0  | Breast, Lung, Gynecological, Sarcoma                                     | NO      | NR                       | NR  | NR  | NR  |
| DiBenedetto, 1995                               | Adults (18-65)           | 81  | 86.4  | Hematological, Lung, Sarcoma, Gynecological                              | NO      | NR                       | NR  | NR  | NR  |
| Dick, 1995                                      | Children ( $\leq 18$ )   | 30  | 46.7  | Hematological                                                            | NO      | NR                       | NR  | NR  | NR  |
| Fedele, 1995                                    | Adults & Elderly (18-99) | 25  | NR    | Hematological                                                            | NO      | NR                       | NR  | NR  | HIV |
| Gebbia, 1995                                    | Adults & Elderly (18-99) | 262 | 30.9  | Head and Neck, Lung, Gynecological, Breast, Genitourinary                | YES     | NR                       | NR  | NR  | NR  |
| Hahlen, 1995                                    | Children ( $\leq 18$ )   | 88  | NR    | Sarcoma                                                                  | NO      | NR                       | NR  | NR  | NR  |
| Italian Group for Antiemetic Research, 1995     | Adults & Elderly (18-99) | 973 | 32.0  | Gynecologic, Lung, Head and Neck, Genitourinary                          | YES     | NR                       | NR  | NR  | NR  |
| Labar, 1995                                     | Adults (18-65)           | 52  | 44.2  | Hematological                                                            | NO      | Radiotherapy             | NR  | NR  | NR  |
| Latreille, 1995                                 | Adults & Elderly (18-99) | 292 | 64.0  | Genitourinary, Lung, Gynecological, Head and Neck, Other                 | YES     | NR                       | YES | YES | NR  |
| Mantovani, 1995                                 | Adults & Elderly (18-99) | 117 | 3.4   | Head and Neck                                                            | YES     | NR                       | NR  | NR  | NR  |
| Marty, 1995                                     | Adults & Elderly (18-99) | 231 | 28.6  | Lung, Gastrointestinal, Gentiourinary, Other                             | Partial | NR                       | NR  | NR  | NR  |
| Navari, 1995a                                   | Adults & Elderly (18-99) | 536 | 16.2  | Lung, Head and Neck, Gastrointestinal, Genitourinary, Gynecologic, Other | YES     | NR                       | NR  | NR  | NR  |
| Navari, 1995b                                   | Adults & Elderly (18-99) | 987 | 36.5  | Lung                                                                     | YES     | NR                       | NR  | NR  | NR  |
| Stewart, 1995                                   | Adults & Elderly (18-99) | 488 | 100.0 | Breast                                                                   | NO      | NR                       | NR  | NR  | NR  |
| The Italian Group for Antiemetic Research, 1995 | Adults & Elderly (18-99) | 408 | 84.1  | Gynecologic, Lung, Breast                                                | NO      | NR                       | NR  | NR  | NR  |
| Tsavaris, 1995b                                 | Adults & Elderly (18-99) | 84  | 27.4  | Lung, Gynecological, Head and Neck, Other                                | YES     | NR                       | NR  | NR  | NR  |
| Tsavaris, 1995a                                 | Adults & Elderly (18-99) | 80  | 32.5  | Lung, Gynecological, Head and Neck, Sarcoma, Other                       | YES     | NR                       | NR  | NR  | NR  |



|                  |                          |     |       |                                                                                         |         |    |     |     |    |
|------------------|--------------------------|-----|-------|-----------------------------------------------------------------------------------------|---------|----|-----|-----|----|
| Ahn, 1994        | Adults & Elderly (18-99) | 49  | 34.7  | Gastrointestinal, Gynecological, Adenocarcinoma                                         | YES     | NR | NR  | NR  | NR |
| Carmichael, 1994 | Adults & Elderly (18-99) | 278 | 81.6  | Breast, Other                                                                           | Partial | NR | NR  | NR  | NR |
| Chevallier, 1994 | Adults (18-65)           | 101 | NR    | NR                                                                                      | YES     | NR | NR  | NR  | NR |
| Chiu, 1994       | Adults (18-65)           | 56  | 23.0  | Hematological                                                                           | NO      | NR | NR  | NR  | NR |
| Cubeddu, 1994    | Adults & Elderly (18-99) | 324 | 86.4  | Breast, Lung, Hematological                                                             | NO      | NR | NR  | NR  | NR |
| Gebbia, 1994a    | Adults & Elderly (18-99) | 166 | 36.1  | Head and Neck, Lung, Genitourinary, Gynecological, Gastrointestinal, Endometrium, Vulva | YES     | NR | NR  | NR  | NR |
| Gebbia, 1994b    | Adults & Elderly (18-99) | 158 | 79.1  | Breast, Lung, Gynecological, Gastrointestinal, Hematological, Melanoma                  | NO      | NR | NR  | NR  | NR |
| Heron, 1994      | Adults & Elderly (18-99) | 357 | 59.9  | Gynecologic, Head and Neck, Lung, Genitourinary, Gastrointestinal                       | YES     | NR | NR  | NR  | NR |
| Hesketh, 1994    | Adults & Elderly (18-99) | 275 | 28.0  | Lung, Head and Neck, Gastrointestinal, Other                                            | YES     | NR | NR  | NR  | NR |
| Hulstaert, 1994  | All groups               | 445 | 68.0  | Breast, Lung, Head and Neck, Gynecological                                              | Partial | NR | NR  | NR  | NR |
| Joss, 1994       | Adults & Elderly (18-99) | 207 | 42.5  | Head and Neck, Lung, Gynecological, Genitourinary, Other                                | Partial | NR | NR  | YES | NR |
| Kaizer, 1994     | Adults & Elderly (18-99) | 295 | 75.3  | Breast, Lung, Gynecological, Other                                                      | Partial | NR | YES | NR  | NR |
| Lim, 1994        | Adults & Elderly (18-99) | 55  | 43.6  | Head and Neck, Gynecological, Lung, Gastrointestinal, Other                             | YES     | NR | NR  | NR  | NR |
| Navari, 1994     | Adults & Elderly (18-99) | 184 | 30.4  | Lung, Head and Neck                                                                     | YES     | NR | NR  | NR  | NR |
| Noble, 1994      | Adults & Elderly (18-99) | 359 | 22.5  | Head and Neck, Lung, Gynecological, Genitourinary, Other                                | YES     | NR | NR  | NR  | NR |
| Riviere, 1994    | Adults & Elderly (18-99) | 157 | 44.6  | Head and Neck, Gynecological, Lung, Genitourinary, Melanoma, Gastrointestinal           | YES     | NR | NR  | NR  | NR |
| Ruff, 1994       | Adults (18-65)           | 496 | 43.8  | Gynecologic, Lung, Head and Neck, Genitourinary, Gastrointestinal, Bone And Soft Tissue | YES     | NR | NR  | NR  | NR |
| Sorbe, 1994      | Adults & Elderly (18-99) | 63  | 100.0 | Gynecologic                                                                             | YES     | NR | NR  | YES | NR |
| Suarez, 1994     | Children ( $\leq 18$ )   | 44  | 15.9  | Hematological, Sarcoma, CNS, Optic                                                      | NO      | NR | NR  | NR  | NR |
| Tsavaris, 1994   | Adults & Elderly (18-99) | 90  | 28.9  | Lung, Gynecological, Head and Neck, Sarcoma, Other                                      | YES     | NR | NR  | YES | NR |
| Tyson, 1994      | Adults & Elderly (18-99) | 44  | 34.1  | Lung, Other                                                                             | YES     | NR | NR  | NR  | NR |

|                                       |                              |     |       |                                                                                                |         |                          |    |    |    |
|---------------------------------------|------------------------------|-----|-------|------------------------------------------------------------------------------------------------|---------|--------------------------|----|----|----|
| Van Belle, 1994a                      | Adults & Elderly (18-99)     | 143 | 36.4  | Lung, Genitourinary, Gynecological, Breast, Other                                              | YES     | NR                       | NR | NR | NR |
| Van Belle, 1994b                      | Adults & Elderly (18-99)     | 74  | 29.7  | Lung, Genitourinary, Other                                                                     | YES     | NR                       | NR | NR | NR |
| Beck, 1993                            | Adults & Elderly (18-99)     | 349 | 84.5  | Breast, Lung, Hematological, Other                                                             | NO      | NR                       | NR | NR | NR |
| Bosi, 1993                            | Adults & Children (0 to <65) | 40  | 52.5  | Hematological, Other                                                                           | NO      | NR                       | NR | NR | NR |
| Buser, 1993                           | Adults & Elderly (18-99)     | 82  | 100.0 | Breast                                                                                         | NO      | Adjuvant/<br>Neoadjuvant | NR | NR | NR |
| Chevallier, 1993                      | Adults & Elderly (18-99)     | 281 | 34.9  | NR                                                                                             | YES     | NR                       | NR | NR | NR |
| Cunningham, 1993                      | Adults (18-65)               | 32  | 25.0  | Hematological, Gastrointestinal, Sarcoma, Head and Neck, Gynecologic                           | Partial | NR                       | NR | NR | NR |
| Grunberg, 1993                        | Adults & Elderly (18-99)     | 125 | 32.0  | Lung, Head and Neck, Gastrointestinal, Genitourinary, Gynecologic, Bone And Soft Tissue, Other | YES     | NR                       | NR | NR | NR |
| Herrstedt, 1993                       | Adults (18-65)               | 30  | 93.3  | Breast                                                                                         | NO      | Adjuvant                 | NR | NR | NR |
| Hunter, 1993                          | Adults (18-65)               | 284 | 18.0  | NR                                                                                             | YES     | NR                       | NR | NR | NR |
| Jantunen, 1993                        | Adults & Elderly (18-99)     | 166 | 83.7  | Breast, Gastrointestinal, Hematological, Lung, Head and Neck, Mesothelioma, Other              | Partial | NR                       | NR | NR | NR |
| Levitt, 1993                          | Adults & Elderly (18-99)     | 164 | 100.0 | Breast                                                                                         | NO      | NR                       | NR | NR | NR |
| Madej, 1993                           | All groups                   | 115 | 83.5  | Genitourinary, Head and Neck                                                                   | YES     | NR                       | NR | NR | NR |
| Rath, 1993                            | Adults & Elderly (18-99)     | 113 | 0.0   | Genitourinary                                                                                  | YES     | NR                       | NR | NR | NR |
| Smith (Granisetron Study Group), 1993 | Adults (18-65)               | 504 | 66.1  | NR                                                                                             | YES     | NR                       | NR | NR | NR |
| Beck, 1992                            | Adults & Elderly (18-99)     | 699 | 33.5  | Lung, Head and Neck, Gastrointestinal, Genitourinary, Gynecologic, Bone And Soft Tissue, Other | YES     | NR                       | NR | NR | NR |
| Bots, 1992                            | Adults & Elderly (18-99)     | 125 | 52.0  | Genitourinary, Lung, Breast, Hematological                                                     | Partial | NR                       | NR | NR | NR |
| Dicato, 1992                          | Adults (18-65)               | 324 | 72.2  | Breast, Hematological, Lung                                                                    | NO      | NR                       | NR | NR | NR |
| Jantunen, 1992                        | Adults & Elderly (18-99)     | 47  | 70.2  | Breast, Lung, Melanoma, Other                                                                  | NO      | NR                       | NR | NR | NR |
| Seynaeve, 1992                        | Adults & Elderly (18-99)     | 535 | 50.8  | Head and Neck, Lung, Gastrointestinal, Genitourinary, Gynecologic, Bone And Soft Tissue, Other | YES     | NR                       | NR | NR | NR |

|                  |                             |     |       |                                                                                         |         |          |    |    |    |
|------------------|-----------------------------|-----|-------|-----------------------------------------------------------------------------------------|---------|----------|----|----|----|
| Sledge, 1992     | Adults & Children (0 - <65) | 46  | 0.0   | Genitourinary, Adenocarcinoma                                                           | YES     | Adjuvant | NR | NR | NR |
| Soukop, 1992     | Adults & Elderly (18-99)    | 187 | 100.0 | Breast                                                                                  | NO      | Adjuvant | NR | NR | NR |
| Gandara, 1991    | NR                          | 274 | 84.1  | NR                                                                                      | YES     | NR       | NR | NR | NR |
| Hainsworth, 1991 | Adults & Elderly (18-99)    | 274 | 31.3  | Head and Neck, Lung, Gastrointestinal, Gynecological, Genitourinary                     | YES     | NR       | NR | NR | NR |
| Jones, 1991      | Adults & Elderly (18-99)    | 112 | 65.0  | Lung, Breast, Gastrointestinal, Hematological, Other                                    | NO      | NR       | NR | NR | NR |
| Marschner, 1991  | Adults & Elderly (18-99)    | 122 | 100.0 | NR                                                                                      | NO      | NR       | NR | NR | NR |
| Roila, 1991      | Adults & Elderly (18-99)    | 102 | 43.3  | Genitourinary, Lung, Head and Neck, Other                                               | YES     | NR       | NR | NR | NR |
| Smith, 1991      | Adults (18-65)              | 31  | 3.2   | Germ Cell Tumor                                                                         | YES     | NR       | NR | NR | NR |
| Smyth, 1991      | Adults & Elderly (18-99)    | 100 | 47.0  | NR                                                                                      | YES     | NR       | NR | NR | NR |
| Warr, 1991       | Adults (18-65)              | 152 | 61.2  | NR                                                                                      | Partial | NR       | NR | NR | NR |
| Bonneterre, 1990 | Adults & Elderly (18-99)    | 75  | NR    | NR                                                                                      | NO      | Adjuvant | NR | NR | NR |
| Cubeddu, 1990a   | Adults & Elderly (18-99)    | 20  | 85.0  | Breast, Head and Neck, Sarcoma, Hematological                                           | NO      | NR       | NR | NR | NR |
| Cubeddu, 1990b   | Adults & Elderly (18-99)    | 28  | 71.4  | Lung, Head and Neck, Genitourinary                                                      | YES     | NR       | NR | NR | NR |
| Cupissol, 1990   | Adults & Elderly (18-99)    | 28  | 28.6  | NR                                                                                      | YES     | NR       | NR | NR | NR |
| De Mulder, 1990  | Adults & Elderly (18-99)    | 121 | 56.2  | Head and Neck, Lung, Gastrointestinal, Genitourinary, Gynecologic                       | YES     | NR       | NR | NR | NR |
| Falkson, 1990    | NR                          | 56  | 46.4  | NR                                                                                      | Partial | NR       | NR | NR | NR |
| Kaasa, 1990      | Adults & Elderly (18-99)    | 93  | 79.6  | Breast, Hematological, Other                                                            | NO      | NR       | NR | NR | NR |
| Khojasteh, 1990  | Adults & Elderly (18-99)    | 36  | 19.4  | Head and Neck, Lung, Gastrointestinal, Other                                            | YES     | NR       | NR | NR | NR |
| Marty, 1990a     | Adults & Elderly (18-99)    | 228 | 65.4  | NR                                                                                      | Partial | NR       | NR | NR | NR |
| Marty, 1990b     | Adults & Elderly (18-99)    | 97  | 57.7  | Gynecologic, Lung, Gastrointestinal, Genitourinary, Breast, Bone And Soft Tissue, Other | YES     | NR       | NR | NR | NR |

*Non-Randomized Control Trials (n=33)*

|                  |                          |     |      |                                                                                                 |         |              |     |     |    |
|------------------|--------------------------|-----|------|-------------------------------------------------------------------------------------------------|---------|--------------|-----|-----|----|
| Gabraïl, 2015(a) | Aduts (18-65)            | 45  | 60   | Ovarian, Breast, Lung, Lymphoma/leukemia, Endometrial/cervical/vulvar, Colorectal, Bladder      | Partial | NR           | NR  | NR  | NR |
| Kim JS, 2014     | Adults & Elderly (18-99) | 180 | 40.5 | Colorectal                                                                                      | NO      | NR           | NR  | YES | NR |
| Abali, 2007      | Adults & Elderly (18-99) | 158 | 72.8 | Breast, Hematological, Lung, Other                                                              | Partial | NR           | YES | YES | NR |
| Tan, 2004        | Adults & Elderly (18-99) | 26  | 61.5 | Hematological, Lung, Head and Neck, Gynecological, Other                                        | NR      | NR           | NR  | NR  | NR |
| Carmichael, 2003 | Adults (18-65)           | 41  | 39.0 | Lung, Gastrointestinal, Gynecological, Breast, Melanoma                                         | Partial | NR           | NR  | NR  | NR |
| Raynov, 2002     | Adults (18-65)           | 101 | 45.5 | Breast, Hematological                                                                           | NO      | NR           | NR  | NR  | NR |
| Yamac, 2002      | Adults & Elderly (18-99) | 97  | 69.1 | Breast, Lung, Gastrointestinal                                                                  | Partial | NR           | NR  | NR  | NR |
| Liaw, 2001       | All groups               | 721 | 36.1 | Lung, Breast, Head and Neck, Genitourinary, Gastrointestinal, Other                             | YES     | NR           | NR  | NR  | NR |
| Watters, 2001    | Adults & Elderly (18-99) | 274 | 63.9 | Breast, Gastrointestinal, Gynecological, Head and Neck, Hematological, Lung                     | YES     | NR           | NR  | NR  | NR |
| Zeng, 2001       | Aduts (18-65)            | 69  | 34.8 | Hematological                                                                                   | NO      | NR           | NR  | NR  | NR |
| Coppes, 1999a    | Children ( $\leq 18$ )   | 46  | 37.0 | NR                                                                                              | NO      | NR           | NR  | YES | NR |
| Coppes, 1999b    | Children ( $\leq 18$ )   | 32  | 53.1 | NR                                                                                              | NR      | NR           | NR  | YES | NR |
| Tsavaris, 1999   | Adults & Elderly (18-99) | 76  | 78.9 | Breast, Lung, Gynecological, Unknown/Other                                                      | NO      | NR           | NR  | NR  | NR |
| Kris, 1998       | Adults & Elderly (18-99) | 44  | 47.7 | Lung, Sarcoma                                                                                   | YES     | NR           | NR  | YES | NR |
| Chang, 1997      | Adults & Elderly (18-99) | 51  | 49.0 | Hematological, Head and Neck, Gynecological, Genitourinary, Breast, Lung, Embryonic Carcinoma   | Partial | NR           | NR  | NR  | NR |
| Belkacemi, 1996  | Aduts (18-65)            | 36  | 39.0 | Hematological                                                                                   | NO      | Radiotherapy | NR  | NR  | NR |
| Gaedicke, 1996   | Children ( $\leq 18$ )   | 49  | NR   | Hematological, Sarcoma                                                                          | NR      | NR           | NR  | NR  | NR |
| Hesketh, 1996a   | Adults & Elderly (18-99) | 69  | 71.0 | Breast, Other                                                                                   | NO      | NR           | NR  | NR  | NR |
| Hesketh, 1995    | Adults & Elderly (18-99) | 146 | 63.0 | Lung, Breast, Hematological, Other                                                              | NO      | NR           | NR  | NR  | NR |
| Conroy, 1994     | Adults & Elderly (18-99) | 164 | 40.2 | Genitourinary, Head and Neck, Gastrointestinal, Lung, Breast, Bone, Other                       | YES     | NR           | NR  | NR  | NR |
| Kris, 1994       | Adults & Elderly (18-99) | 89  | 35.0 | Lung, Head and Neck, Other                                                                      | YES     | NR           | NR  | NR  | NR |
| Merrouche, 1994  | Adults & Elderly (18-99) | 25  | 60.0 | Gynecologic, Head and Neck, Melanoma, Genitourinary, Gynecologic, Hematological                 | YES     | NR           | NR  | NR  | NR |
| de Wet, 1993     | Adults & Elderly (18-99) | 91  | 51.7 | Breast, Gynecological, Gastrointestinal, Hematological, Genitourinary, Sarcoma, Unknown Primary | Partial | NR           | NR  | NR  | NR |
| Pisters, 1993    | Adults & Elderly (18-99) | 22  | 36.4 | Lung, Sarcoma                                                                                   | YES     | NR           | NR  | NR  | NR |

|                  |                          |     |       |                                                                                    |         |          |    |    |    |
|------------------|--------------------------|-----|-------|------------------------------------------------------------------------------------|---------|----------|----|----|----|
| Ribiero, 1993    | Adults & Elderly (18-99) | 145 | 53.1  | NR                                                                                 | Partial | NR       | NR | NR | NR |
| Dundee, 1992     | Adults & Elderly (18-99) | 233 | NR    | NR                                                                                 | NR      | NR       | NR | NR | NR |
| Fraschini, 1991  | Adults & Elderly (18-99) | 80  | 100.0 | Breast                                                                             | NO      | Adjuvant | NR | NR | NR |
| Lemerle, 1991    | Children (≤18)           | 24  | 29.0  | Sarcoma, Hematological, Nervous System, Genitourinary                              | YES     | NR       | NR | NR | NR |
| Seynaeve, 1991   | Adults & Elderly (18-99) | 35  | 68.6  | Hematological, Breast, Gynecological, Sarcoma, Other                               | NO      | NR       | NR | NR | NR |
| Addelman, 1990   | NR                       | 24  | NR    | NR                                                                                 | Partial | NR       | NR | NR | NR |
| Cunningham, 1989 | All groups               | 16  | NR    | NR                                                                                 | Partial | NR       | NR | NR | NR |
| Grunberg, 1989   | Adults & Elderly (18-99) | 43  | 23.3  | Lung, Germ Cell Cancer, Unknown Primary, Genitourinary, Head and Neck, Skin Cancer | YES     | NR       | NR | NR | NR |
| De Hann, 1988    | Adults (18-65)           | 13  | NR    | NR                                                                                 | YES     | NR       | NR | NR | NR |

**Cohort studies (n=19)**

|                    |                          |     |       |                                                                           |         |              |     |    |              |
|--------------------|--------------------------|-----|-------|---------------------------------------------------------------------------|---------|--------------|-----|----|--------------|
| Anvari, 2015       | Adults & Elderly (18-99) | 117 | 86.9  | Breast, Lymphoma, Others                                                  | NO      | NR           | NR  | NR | NR           |
| Zoto, 2015         | Adults (18-65)           | 155 | 54    | Gastrointestinal, Breast, Lymphoma (Hodgkin and NHL), Lung, Genitourinary | NO      | YES          | YES | NR | NR           |
| Murakami, 2014     | Adults & Elderly (18-99) | 46  | 30.43 | Gastro-intestinal                                                         | NO      | NR           | NR  | NR | NR           |
| Keat, 2013         | Adults (18-65)           | 52  | 48.9  | NR                                                                        | NO      | NR           | YES | NR | NR           |
| Blazer, 2012       | Adults (18-65)           | 305 | 47.0  | Gastrointestinal                                                          | NO      | NR           | NR  | NR | NR           |
| Pielichowski, 2011 | Adults (18-65)           | 60  | 45.0  | Hematological                                                             | NO      | NR           | NR  | NR | NR           |
| Taguchi, 2009      | Adults & Elderly (18-99) | 59  | 100.0 | Breast                                                                    | NO      | NR           | NR  | NR | NR           |
| Carreca, 2007*     | NR                       | 67  | NR    | Breast                                                                    | NO      | NR           | NR  | NR | NR           |
| Hamadani, 2007     | Adults & Elderly (18-99) | 126 | 41.3  | Lung, Head and Neck, Gastrointestinal, Genitourinary, Other               | Partial | NR           | NR  | NR | NR           |
| Adel, 2006*        | Adults & Elderly (18-99) | 176 | 42.6  | NR                                                                        | NR      | NR           | NR  | NR | NR           |
| Shikimori, 2006    | Adults & Elderly (18-99) | 63  | 41.3  | Head and Neck                                                             | YES     | Neoadjuvant  | NR  | NR | NR           |
| Trifilio, 2006*    | NR                       | 69  | NR    | Myeloma                                                                   | NO      | NR           | NR  | NR | NR           |
| Babaoglu, 2005     | Adults (18-65)           | 216 | 75.0  | Breast, Hematological, Lung, Other                                        | Partial | NR           | YES | NR | NR           |
| Dempsey, 2004      | Adults (18-65)           | 224 | 100.0 | Breast                                                                    | NO      | Radiotherapy | NR  | NR | NR           |
| Steiner, 2003      | Adults & Elderly (18-99) | 62  | 71.0  | Breast, Gynecological, Lung, Hematological, Melanoma                      | Partial | Radiotherapy | NR  | NR | GI disorders |
| Brown, 1998        | All groups               | 49  | NR    | Breast                                                                    | NO      | Adjuvant     | NR  | NR | NR           |

|               |                          |     |       |                                                                   |         |    |    |     |    |
|---------------|--------------------------|-----|-------|-------------------------------------------------------------------|---------|----|----|-----|----|
| Blijham, 1992 | Adults (18-65)           | 909 | 55.23 | NR                                                                | Partial | NR | NR | NR  | NR |
| Farley, 1997  | Adults & Elderly (18-99) | 119 | 74.79 | Breast, Lung, Colon, Female Reproductive Organs, Lymphoma, Others | Partial | NR | NR | YES | NR |
| Harris, 1997  | All groups               | 608 | 61.74 | Breast, Gynecological, Lymphoma, Lung                             | Partial | NR | NR | YES | NR |

*Controlled Before and After study (n=1 )*

|                |    |    |    |                                                             |    |  |    |    |    |
|----------------|----|----|----|-------------------------------------------------------------|----|--|----|----|----|
| Rzepecki, 2009 | NR | 46 | NR | Lymphoma, Relapsed Germ Cell Tumors, Acute Myeloid Leukemia | NR |  | NR | NR | NR |
|----------------|----|----|----|-------------------------------------------------------------|----|--|----|----|----|

**Abbreviations:** CDDP – cisplatin; CINV – chemotherapy-induced nausea and vomiting; H/o, history of; NR - not reported; UK - United Kingdom; USA - United States of America

\*Includes Unpublished data (Adel 2006, Tabei 2006, Trifilio 2006, Carreca 2007, Kadota 2007, Piyush 2011)

## Appendix D. Aggregate Cochrane EPOC risk-of-bias appraisal results

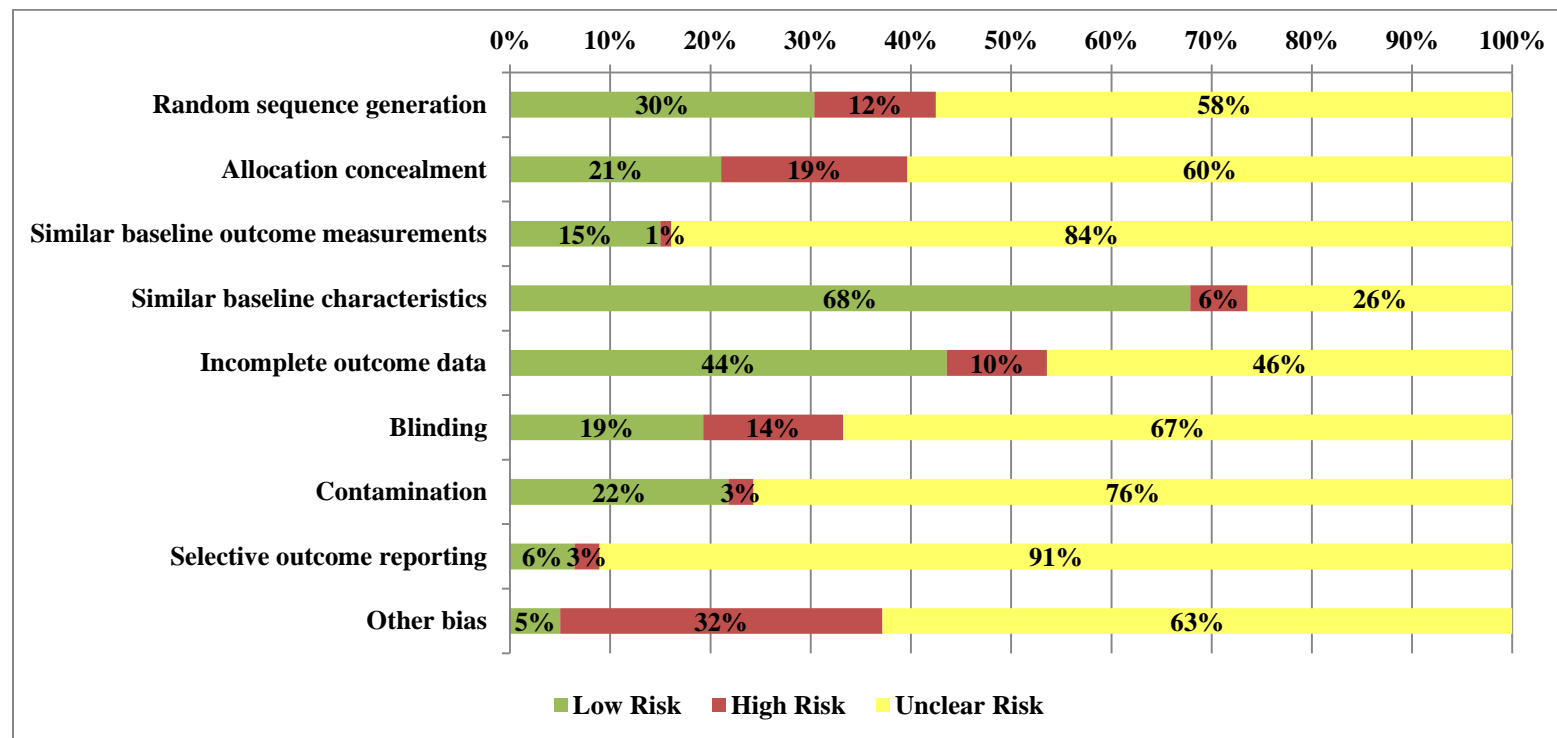

**Abbreviations:** EPOC - Effective Practice and Organisation of Care; High Risk - high risk of bias; Low Risk - low risk of bias; Unclear Risk - unclear risk of bias

## Appendix E. Cochrane EPOC risk-of-bias appraisal results

| Author, year                              | 1       | 2       | 3       | 4       | 5       | 6       | 7       | 8       | 9       |
|-------------------------------------------|---------|---------|---------|---------|---------|---------|---------|---------|---------|
| <i>Randomized Clinical Trials (n=246)</i> |         |         |         |         |         |         |         |         |         |
| Kovacs, 2016                              | Low     | Low     | Unclear | High    | Low     | Low     | High    | Low     | Unclear |
| Gabrail, 2015(b)                          | Low     | Low     | Low     | Unclear | Low     | Unclear | Unclear | Unclear | Unclear |
| Karthus, 2015                             | Unclear | Unclear | Unclear | Low     | Low     | Unclear | High    | Low     | Unclear |
| Kim K, 2015                               | Low     | Low     | Unclear | High    | Unclear | Unclear | High    | Low     | Unclear |
| Kim JE, 2015                              | Unclear | Unclear | Low     | Low     | High    | Unclear | Unclear | Unclear | Unclear |
| Kimura, 2015                              | Unclear | Unclear | Unclear | High    | Unclear | Unclear | High    | Unclear | Unclear |
| Ohzawa, 2015                              | Low     | Unclear | Unclear | High    | Low     | Unclear | High    | Unclear | Unclear |
| Raftopolous, 2015                         | Unclear | Unclear | Unclear | High    | Low     | Unclear | High    | Unclear | High    |
| Sanmukhani, 2014                          | Unclear | Unclear | Low     | Unclear | Unclear | Unclear | Unclear | Unclear | Unclear |
| Huang, 2013                               | Low     | Low     | Low     | Unclear | Low     | Unclear | Unclear | Unclear | Unclear |
| Wenzell, 2013                             | Unclear | Low     | Low     | High    | Low     | Unclear | Unclear | Unclear | Unclear |
| Boccia, 2013                              | Low     | Unclear | Unclear | Low     | Low     | Unclear | Low     | Unclear | Unclear |
| Endo, 2012                                | Low     | Unclear | Unclear | Low     | Unclear | Unclear | Unclear | Unclear | Unclear |
| Ithimakin, 2012                           | Low     | Low     | Low     | Low     | Low     | Unclear | Unclear | Unclear | Low     |
| Noor, 2012                                | Unclear | Unclear | Unclear | Low     | Unclear | Unclear | Unclear | Unclear | Unclear |
| Roscoe, 2012                              | Low     | Unclear | Unclear | Low     | Unclear | Low     | Low     | Unclear | High    |
| Tsuji, 2012                               | Low     | Low     | Unclear | Low     | Low     | Low     | Low     | Unclear | Low     |
| Boccia, 2011                              | Low     | Unclear | Unclear | Low     | Low     | Unclear | Unclear | High    | Unclear |
| Dong, 2011                                | Unclear | Unclear | Low     | Low     | Unclear | Unclear | Unclear | Unclear | Unclear |
| Giralt, 2011                              | Unclear | Unclear | Low     | Low     | Unclear | Low     | Low     | Unclear | High    |
| Piyush, 2011*                             | Unclear | Unclear | Unclear | Unclear | Unclear | Unclear | Unclear | Unclear | Unclear |
| Siddique, 2011                            | Unclear | Low     | Unclear | Unclear | Unclear | Low     | Unclear | Unclear | Unclear |
| Tian, 2011                                | Low     | Low     | Unclear | Low     | Low     | Low     | Unclear | Low     | Unclear |
| Ghosh, 2010                               | Unclear | Unclear | Unclear | Low     | Low     | Low     | Low     | Unclear | Unclear |
| Ho, 2010                                  | Unclear | Unclear | Unclear | Low     | Low     | Unclear | Low     | Unclear | Unclear |
| Kaushal, 2010                             | Low     | High    | Unclear | Unclear | Low     | High    | Unclear | Unclear | High    |
| Mattiuzzi, 2010                           | Unclear | High    | Unclear | Low     | Low     | Unclear | Low     | Unclear | Unclear |
| Keyhanian, 2009                           | Low     | Low     | Unclear | Low     | Low     | Low     | Unclear | Unclear | Unclear |
| Maemondo, 2009                            | Unclear | Unclear | Unclear | Low     | Unclear | Low     | Unclear | Unclear | High    |
| Saito, 2009                               | Low     | Low     | Low     | Low     | Low     | Low     | Low     | Low     | Unclear |
| Segawa, 2009                              | Unclear | Unclear | Unclear | Low     | Low     | Unclear | Low     | Unclear | High    |
| Yonemura, 2009                            | Low     | High    | Unclear | High    | Low     | High    | Unclear | High    | Unclear |
| Yu, 2009                                  | Unclear | Unclear | Unclear | Low     | Low     | Unclear | Unclear | Low     | Unclear |
| Chen, 2008                                | High    | Unclear | Low     | Low     | Low     | Unclear | Unclear | Unclear | Unclear |
| Fabi, 2008                                | Unclear | Unclear | Unclear | Low     | Unclear | Unclear | Low     | Unclear | Unclear |
| Nagel, 2008                               | Unclear | Unclear | Unclear | Unclear | High    | Unclear | Unclear | Unclear | High    |
| Sepúlveda-Vildósola, 2008                 | Unclear | Unclear | Unclear | Low     | Unclear | Low     | Unclear | Unclear | Low     |
| Berrak, 2007                              | Unclear | Low     | Unclear | Unclear | High    | Unclear | Unclear | Unclear | Unclear |
| Herrstedt, 2007                           | Low     | Low     | Unclear | Low     | Low     | Unclear | Unclear | Unclear | Unclear |
| Kadota, 2007*                             | Unclear | High    | Unclear | Unclear | Unclear | Unclear | Unclear | Unclear | Unclear |
| Pectasides, 2007                          | Unclear | Unclear | Unclear | Low     | Unclear | High    | Unclear | Unclear | Unclear |
| Shi, 2007                                 | Unclear | Unclear | Low     | Low     | Low     | Unclear | Low     | Low     | Unclear |
| Aapro, 2006                               | Low     | Unclear | Unclear | Unclear | Low     | Unclear | Unclear | Unclear | Unclear |
| Pinarli, 2006                             | Unclear | Unclear | Unclear | Unclear | Unclear | Low     | Unclear | Unclear | Unclear |
| Tabei, 2006*                              | Unclear | Unclear | Unclear | Unclear | Unclear | Unclear | Unclear | Unclear | Unclear |
| Buyukavci, 2005                           | Unclear | Unclear | Low     | Low     | Unclear | Low     | Unclear | Unclear | Unclear |
| Cheirsilpa, 2005                          | Unclear | Low     | Unclear | Low     | Unclear | Unclear | Unclear | Unclear | Unclear |
| Corapcioglu, 2005                         | Unclear | High    | Unclear | Unclear | Low     | Low     | Unclear | Unclear | Low     |
| Kurnianda, 2005                           | Unclear | Low     | Unclear | Low     | Unclear | Low     | Unclear | Unclear | Unclear |
| Lindley, 2005                             | Unclear | Low     | Unclear | Low     | Unclear | Low     | Unclear | Unclear | Unclear |
| Mandanas, 2005                            | Unclear | High    | Unclear | Low     | Unclear | High    | Unclear | Unclear | Unclear |
| Yano, 2005                                | Unclear | Unclear | Unclear | Low     | Unclear | Unclear | Unclear | Unclear | Unclear |
| Eisenberg, 2004                           | Unclear | Unclear | Unclear | Low     | Low     | Unclear | Unclear | Unclear | High    |
| Jaing, 2004                               | Unclear | High    | Unclear | Low     | Low     | High    | Unclear | Unclear | Unclear |
| Kim, 2004                                 | Unclear | High    | Unclear | Low     | Unclear | High    | Unclear | Unclear | Unclear |
| Tantipalakorn, 2004                       | Unclear | Unclear | Unclear | Unclear | Unclear | Unclear | Unclear | Unclear | Unclear |
| Villalon, 2004                            | Low     | Unclear | Unclear | Low     | Unclear | Unclear | Unclear | Unclear | Unclear |
| Aapro, 2003                               | Low     | Unclear | Unclear | Low     | Unclear | Unclear | Unclear | Low     | Unclear |



|                                                         |         |         |         |         |         |         |         |         |         |
|---------------------------------------------------------|---------|---------|---------|---------|---------|---------|---------|---------|---------|
| Bhatia, 2003                                            | Unclear | Unclear | Unclear | Low     | High    | Unclear | Unclear | Unclear | Unclear |
| Eisenberg, 2003                                         | Low     | Unclear | Unclear | Low     | Unclear | Unclear | Unclear | Unclear | Unclear |
| Gralla, 2003                                            | Low     | Low     | Unclear | Low     | Low     | Low     | Low     | Unclear | High    |
| Koizumi, 2003                                           | Low     | Low     | Unclear | Low     | Low     | Unclear | Unclear | Unclear | Unclear |
| Matsuoka, 2003                                          | Unclear | Unclear | Unclear | Low     | Low     | Unclear | Unclear | Unclear | Unclear |
| Sagae, 2003                                             | Unclear | Unclear | Unclear | Low     | Low     | Unclear | Unclear | Unclear | Unclear |
| Feng, 2002a                                             | Unclear | Unclear | Unclear | Unclear | Low     | High    | Unclear | Unclear | High    |
| Feng, 2002b                                             | Unclear | Unclear | Unclear | Low     | Low     | Unclear | Unclear | Unclear | Unclear |
| Kang, 2002                                              | Low     | Unclear | Unclear | Low     | Low     | High    | Low     | Unclear | Unclear |
| Noda, 2002a                                             | Unclear | Unclear | Unclear | Low     | Low     | Unclear | Unclear | Unclear | Unclear |
| Noda, 2002b                                             | Unclear | Low     | Unclear | Low     | Low     | Low     | Unclear | Unclear | Unclear |
| Aksoylar, 2001                                          | Unclear | Unclear | Unclear | Low     | Unclear | Unclear | Unclear | Unclear | Unclear |
| de Wit, 2001                                            | Unclear | Low     | Unclear | Low     | Unclear | Unclear | Unclear | Unclear | Unclear |
| Fox-Geiman, 2001                                        | Low     | Low     | Unclear | Low     | Low     | Low     | Low     | Unclear | Unclear |
| Koralewski, 2001                                        | High    | Unclear | Unclear | Unclear | Unclear | Unclear | Unclear | Unclear | Unclear |
| Ozgur Tan, 2001                                         | Unclear | High    | Unclear | Unclear | Unclear | High    | Unclear | Unclear | Unclear |
| Parker, 2001                                            | Unclear | Unclear | Low     | Low     | Low     | Unclear | Unclear | Unclear | Unclear |
| Tsavaris, 2001a                                         | Low     | Unclear | Unclear | Low     | Low     | Unclear | Unclear | Unclear | Unclear |
| Tsavaris, 2001b                                         | Low     | Unclear | Unclear | Low     | Unclear | Unclear | Unclear | Unclear | Unclear |
| Abang, 2000                                             | Low     | Unclear | Unclear | Low     | Low     | Unclear | Unclear | Unclear | Unclear |
| Barrajon, 2000                                          | Low     | Low     | Unclear | High    | High    | Unclear | Unclear | Unclear | Unclear |
| Chiou, 2000                                             | Unclear | High    | Unclear | Low     | Low     | High    | Unclear | Unclear | Unclear |
| Chua, 2000                                              | Low     | High    | Unclear | Low     | Low     | High    | Unclear | Unclear | Unclear |
| Fausser, 2000                                           | Unclear | Low     | Unclear | Low     | Low     | Unclear | Unclear | Unclear | Low     |
| Forni, 2000                                             | Unclear | Unclear | Unclear | Low     | Unclear | Unclear | Unclear | Unclear | Unclear |
| Friedman, 2000                                          | Unclear | Low     | Unclear | Low     | Low     | Low     | Low     | Unclear | High    |
| Herrington, 2000                                        | Unclear | High    | Unclear | Unclear | Low     | High    | Low     | Unclear | High    |
| Hesketh, 2000                                           | Unclear | Unclear | Unclear | Low     | Unclear | Unclear | Unclear | Unclear | Unclear |
| Koenig, 2000                                            | Unclear | Unclear | Unclear | Unclear | Low     | Unclear | Unclear | Unclear | High    |
| Oge, 2000                                               | Unclear | Unclear | Unclear | Unclear | Unclear | Unclear | Unclear | Unclear | Unclear |
| Raynov, 2000                                            | Unclear | High    | Unclear | Unclear | Unclear | High    | Unclear | Unclear | High    |
| Roila [The Italian Group for Antiemetic Research], 2000 | Low     | Low     | Unclear | Low     | Low     | Low     | Low     | Low     | High    |
| Slaby, 2000                                             | Unclear | Unclear | Unclear | Low     | Low     | Unclear | Low     | Unclear | Low     |
| Stewart, 2000                                           | Low     | Unclear | Unclear | Unclear | Unclear | Unclear | Unclear | Unclear | High    |
| White, 2000                                             | Low     | Unclear | Unclear | Low     | Unclear | Unclear | Unclear | Unclear | High    |
| Davidson, 1999                                          | Low     | Unclear | Unclear | Low     | High    | Unclear | Unclear | Unclear | High    |
| Kandemir, 1999                                          | Unclear | Unclear | Low     | Low     | Unclear | Unclear | Unclear | Unclear | Unclear |
| Komada, 1999                                            | Unclear | Unclear | Unclear | Low     | Unclear | Unclear | Unclear | Unclear | Unclear |
| Lazarus, 1999                                           | Low     | Low     | Unclear | Low     | Unclear | Low     | Unclear | High    | Unclear |
| Needles, 1999                                           | Unclear | Unclear | Low     | Low     | High    | Unclear | Unclear | Unclear | High    |
| Orchard, 1999                                           | Unclear | Unclear | Unclear | Low     | Low     | Unclear | Unclear | Unclear | Low     |
| Raynov, 1999                                            | Unclear | Unclear | Unclear | Unclear | Low     | Unclear | Low     | Unclear | Unclear |
| Sandoval, 1999                                          | Low     | Low     | Unclear | Low     | Low     | Unclear | Low     | Unclear | Low     |
| Sigsgaard, 1999                                         | Unclear | Unclear | Unclear | Low     | Low     | Unclear | Low     | Unclear | Unclear |
| Stiakaki, 1999                                          | Unclear | Unclear | Unclear | Unclear | Unclear | Unclear | Low     | Unclear | Unclear |
| Tatsumi, 1999                                           | Unclear | Unclear | Unclear | Low     | Unclear | Unclear | Unclear | Unclear | Unclear |
| The Italian Multicenter Study Group, 1999               | Unclear | Unclear | Unclear | Low     | Low     | Unclear | Unclear | Unclear | Unclear |
| Tsuchida, 1999                                          | Low     | Unclear | Unclear | Low     | Unclear | Unclear | Unclear | Unclear | Unclear |
| Uchida, 1999                                            | Low     | Unclear | Unclear | Low     | Unclear | Low     | Low     | Unclear | Unclear |
| Yalcin, 1999                                            | Unclear | Unclear | Unclear | Unclear | Unclear | Unclear | Unclear | Unclear | Unclear |
| Birch, 1998                                             | Unclear | Unclear | Unclear | Low     | Unclear | Unclear | Unclear | Unclear | Unclear |
| Gralla, 1998                                            | Unclear | Low     | Low     | Low     | Low     | Low     | Low     | Unclear | High    |
| Handberg, 1998                                          | Unclear | Low     | Unclear | Low     | Low     | Unclear | Unclear | Unclear | Unclear |
| Kalaycio, 1998                                          | Low     | Low     | Unclear | Low     | High    | Low     | Low     | Unclear | Unclear |
| Kleisbauer, 1998                                        | Unclear | Unclear | Unclear | Low     | Low     | Unclear | Unclear | Unclear | Unclear |
| Krzakowski, 1998                                        | Low     | Low     | Unclear | Low     | Unclear | Low     | Unclear | Unclear | High    |
| Latreille, 1998                                         | Low     | Low     | Unclear | Low     | Low     | Low     | Unclear | Unclear | High    |
| Martoni, 1998                                           | Unclear | Unclear | Unclear | Unclear | High    | Unclear | Unclear | Low     | Low     |
| Perez, 1998                                             | Unclear | Unclear | Unclear | Low     | Low     | Unclear | Unclear | Unclear | High    |
| Perez, 1998                                             | Low     | Low     | Unclear | Low     | Low     | Low     | Low     | Unclear | Unclear |
| Poon, 1998                                              | Unclear | Unclear | Unclear | Unclear | Unclear | Unclear | Unclear | Unclear | Unclear |
| Ritter, 1998                                            | Unclear | Unclear | Low     | Low     | Unclear | Unclear | Unclear | Unclear | High    |
| Scoponi, 1998                                           | Unclear | unclear | Unclear | Unclear | Low     | Unclear | Unclear | High    | Unclear |
| Sorbe, 1998                                             | Unclear | Unclear | Low     | Low     | Low     | Unclear | Low     | Unclear | Unclear |

|                                                         |         |         |         |         |         |         |         |         |         |
|---------------------------------------------------------|---------|---------|---------|---------|---------|---------|---------|---------|---------|
| Spector, 1998                                           | Low     | Unclear | Low     | Low     | Low     | Low     | Low     | High    | Unclear |
| Tsavaris, 1998                                          | Low     | Unclear | Unclear | Low     | Unclear | Unclear | Unclear | Unclear | Unclear |
| Zeidman, 1998                                           | Unclear | Unclear | Unclear | Low     | Unclear | Unclear | Unclear | Unclear | Unclear |
| Beck, 1997                                              | Unclear | Unclear | High    | Low     | Unclear | Unclear | Unclear | Unclear | Unclear |
| Chevallier, 1997                                        | Unclear | Low     | Low     | Low     | Low     | Unclear | Unclear | Unclear | High    |
| Davidson, 1997                                          | Low     | Unclear | Unclear | Low     | High    | Unclear | Unclear | Unclear | High    |
| du Bois, 1997                                           | Low     | Unclear | Low     | Low     | Unclear | Unclear | Unclear | Unclear | Unclear |
| Fumoleau, 1997                                          | Unclear | Unclear | Unclear | Low     | Low     | Low     | Low     | Unclear | High    |
| Gridelli, 1997                                          | Unclear | Low     | Low     | Low     | High    | Unclear | Unclear | Unclear | Unclear |
| Grote, 1997                                             | Unclear | Unclear | Low     | Low     | Low     | Unclear | Unclear | Unclear | Unclear |
| Kasimis, 1997                                           | Unclear | Unclear | Unclear | Low     | Unclear | Unclear | Unclear | Unclear | High    |
| Kigawa, 1997                                            | Unclear | Unclear | Unclear | Unclear | Unclear | Unclear | Unclear | Unclear | High    |
| Kris, 1997                                              | Unclear | Unclear | Unclear | Low     | Unclear | Unclear | Unclear | Unclear | High    |
| Lofters, 1997                                           | Unclear | Low     | Unclear | Low     | Unclear | Low     | Unclear | Unclear | High    |
| Mustacchi, 1997                                         | Unclear | Unclear | High    | Unclear | Unclear | High    | Unclear | Unclear | Unclear |
| Park, 1997                                              | Unclear | High    | Unclear | Low     | Low     | High    | Unclear | Unclear | Unclear |
| Pectasides, 1997                                        | Low     | Unclear | Unclear | Low     | Unclear | Unclear | Unclear | Unclear | Unclear |
| Perez, 1997                                             | Unclear | Unclear | Unclear | Low     | Unclear | Unclear | Unclear | Unclear | Unclear |
| Roila [The Italian Group for Antiemetic Research], 1997 | Low     | Unclear | Low     | Low     | Low     | Unclear | Low     | Unclear | Unclear |
| Rubenstein, 1997                                        | Unclear | Unclear | Low     | Low     | Unclear | Unclear | Unclear | Unclear | High    |
| Advani, 1996                                            | Unclear | Low     | Unclear | Low     | Low     | Low     | Unclear | Unclear | High    |
| Audhuy, 1996                                            | Unclear | Unclear | Unclear | Low     | Low     | Unclear | Unclear | Unclear | Unclear |
| Barrenetxea, 1996                                       | Unclear | Unclear | Unclear | Unclear | Unclear | Unclear | Unclear | Unclear | Unclear |
| Brock, 1996                                             | Unclear | Unclear | Unclear | Unclear | Unclear | Unclear | Low     | Unclear | High    |
| Crucitt, 1996                                           | Unclear | Unclear | Unclear | Low     | Low     | Unclear | Unclear | Unclear | High    |
| de Wit, 1996                                            | Unclear | Unclear | Low     | Low     | Unclear | Unclear | Unclear | Unclear | Unclear |
| Fausser, 1996a                                          | Unclear | Low     | Low     | Low     | Unclear | Low     | Low     | Unclear | Unclear |
| Fausser, 1996b                                          | Unclear | Low     | Unclear | Low     | Low     | Low     | Low     | Unclear | Unclear |
| Fujimoto, 1996                                          | Unclear | Unclear | Unclear | Unclear | Unclear | Unclear | Unclear | Unclear | Unclear |
| Hesketh, 1996b                                          | Unclear | Low     | Low     | Low     | Low     | Low     | Low     | Unclear | Unclear |
| Jorgensen, 1996                                         | Low     | High    | Unclear | Low     | Low     | High    | Unclear | Unclear | Unclear |
| Leonardi, 1996                                          | Unclear | Unclear | Unclear | Unclear | Low     | Unclear | Low     | Unclear | Unclear |
| Martoni, 1996                                           | Unclear | High    | Unclear | Unclear | Unclear | High    | Unclear | Unclear | Unclear |
| Massida & Ionta, 1996                                   | Unclear | Unclear | Low     | Low     | Low     | Unclear | Unclear | Low     | Unclear |
| Matsui, 1996                                            | Unclear | Unclear | Unclear | Low     | Low     | Unclear | Unclear | Unclear | Unclear |
| Olver, 1996                                             | Low     | Low     | Unclear | Low     | Unclear | Unclear | Unclear | Unclear | High    |
| Peterson, 1996                                          | Unclear | Unclear | Unclear | Unclear | Low     | Unclear | Unclear | Unclear | Unclear |
| Yeilding, 1996                                          | Unclear | Unclear | Unclear | Unclear | Unclear | Unclear | Unclear | Unclear | Unclear |
| Adams, 1995                                             | Unclear | Unclear | Unclear | Low     | High    | Unclear | Unclear | Unclear | High    |
| Agura, 1995a                                            | Low     | Unclear | Unclear | Low     | High    | High    | Unclear | Unclear | High    |
| Agura, 1995b                                            | Low     | High    | Unclear | High    | High    | High    | Unclear | Unclear | Unclear |
| Alfieri, 1995                                           | Unclear | Unclear | Unclear | High    | Unclear | Unclear | Unclear | Unclear | Low     |
| Alvarez, 1995                                           | Low     | Low     | Unclear | Unclear | Low     | Low     | Low     | Unclear | Unclear |
| Bleiberg, 1995                                          | Unclear | Unclear | Unclear | Low     | Unclear | Unclear | Unclear | Unclear | Unclear |
| Bonnerre, 1995                                          | Unclear | High    | Unclear | Low     | High    | Unclear | Unclear | Unclear | Unclear |
| Chiou, 1995                                             | Unclear | Unclear | Unclear | Low     | Unclear | Unclear | Unclear | Unclear | Unclear |
| Contu, 1995                                             | Unclear | Unclear | Unclear | Low     | Low     | Unclear | Low     | Unclear | High    |
| DiBenedetto, 1995                                       | Unclear | Unclear | Unclear | Low     | High    | Unclear | Unclear | Unclear | High    |
| Dick, 1995                                              | Unclear | Unclear | Unclear | Unclear | Unclear | Unclear | Unclear | Unclear | Unclear |
| Fedele, 1995                                            | Unclear | Unclear | Unclear | Unclear | Unclear | Unclear | Unclear | Unclear | Unclear |
| Gebbia, 1995                                            | Unclear | High    | Low     | Low     | Low     | Unclear | Unclear | Unclear | Unclear |
| Hahlen, 1995                                            | Low     | Unclear | Unclear | Unclear | Unclear | Unclear | Unclear | Unclear | High    |
| Italian Group for Antiemetic Research, 1995             | Low     | Unclear | Unclear | Low     | Low     | Unclear | Unclear | Unclear | Unclear |
| Labar, 1995                                             | Unclear | Unclear | Unclear | Low     | Unclear | Unclear | Unclear | Unclear | Unclear |
| Latreille, 1995                                         | Low     | Low     | Unclear | Low     | Unclear | Low     | Unclear | Unclear | High    |
| Mantovani, 1995                                         | Unclear | High    | Unclear | Low     | Unclear | High    | Unclear | Unclear | Unclear |
| Marty, 1995                                             | Low     | Unclear | Unclear | Low     | Unclear | Unclear | Low     | Low     | High    |
| Navari, 1995a                                           | Low     | Unclear | Unclear | Low     | High    | Unclear | Unclear | Unclear | High    |
| Navari, 1995b                                           | Unclear | Unclear | Unclear | Low     | High    | Unclear | Unclear | Unclear | High    |
| Stewart, 1995                                           | Low     | Low     | Unclear | Low     | Low     | Low     | Low     | Unclear | High    |
| The Italian Group for Antiemetic Research, 1995         | Low     | Unclear | Unclear | Low     | Low     | Unclear | Unclear | Unclear | Unclear |
| Tsavaris, 1995a                                         | Unclear | Unclear | Unclear | Low     | Unclear | Unclear | Unclear | Unclear | Unclear |
| Tsavaris, 1995b                                         | Unclear | Unclear | Unclear | Low     | Unclear | Low     | Unclear | Unclear | Unclear |
| Ahn, 1994                                               | Unclear | Low     | Unclear | Low     | Low     | Unclear | Unclear | Unclear | Unclear |

|                                       |         |         |         |         |         |         |         |         |         |
|---------------------------------------|---------|---------|---------|---------|---------|---------|---------|---------|---------|
| Carmichael, 1994                      | Low     | Unclear | Unclear | High    | Unclear | Unclear | Low     | Unclear | High    |
| Chevallier, 1994                      | Unclear | Unclear | Unclear | Low     | Low     | Unclear | Low     | Unclear | Unclear |
| Chiu, 1994                            | Unclear | Unclear | Unclear | Unclear | Unclear | Unclear | Unclear | Unclear | Unclear |
| Cubeddu, 1994                         | Low     | Low     | Unclear | High    | Unclear | Unclear | Unclear | Unclear | High    |
| Gebbia, 1994a                         | Unclear | High    | Unclear | Low     | Low     | Unclear | Low     | Unclear | Unclear |
| Gebbia, 1994b                         | Unclear | High    | Unclear | Low     | Low     | Unclear | Low     | Unclear | Unclear |
| Heron, 1994                           | Unclear | Unclear | Unclear | Low     | Unclear | Low     | Unclear | Unclear | High    |
| Hesketh, 1994                         | Low     | Low     | Unclear | Low     | Low     | Low     | Unclear | Unclear | High    |
| Hulstaert, 1994                       | Low     | Unclear | Unclear | High    | Unclear | Unclear | Unclear | Unclear | High    |
| Joss, 1994                            | Low     | Low     | Unclear | Low     | Low     | Low     | Unclear | Unclear | Unclear |
| Kaizer, 1994                          | Low     | Low     | Unclear | Low     | Low     | Unclear | Unclear | Unclear | High    |
| Lim, 1994                             | Unclear | High    | Unclear | Low     | Unclear | High    | Unclear | Unclear | High    |
| Navari, 1994                          | Unclear | Unclear | Unclear | Unclear | Unclear | Unclear | Unclear | Unclear | Unclear |
| Noble, 1994                           | Unclear | Unclear | Unclear | Low     | Low     | Unclear | Unclear | Unclear | High    |
| Riviere, 1994                         | Unclear | Unclear | Unclear | Low     | Low     | Unclear | Unclear | Unclear | Unclear |
| Ruff, 1994                            | Unclear | Unclear | Low     | Low     | Low     | Unclear | Low     | Low     | High    |
| Sorbe, 1994                           | Unclear | Unclear | Unclear | Low     | Low     | Low     | Unclear | Unclear | High    |
| Suarez, 1994                          | Unclear | Low     | Unclear | Low     | High    | Low     | Unclear | Unclear | Unclear |
| Tsavaris, 1994                        | Unclear | Unclear | Unclear | Low     | Unclear | Unclear | Unclear | Unclear | Unclear |
| Tyson, 1994                           | Low     | Unclear | Low     | Low     | Low     | Unclear | Unclear | Unclear | Unclear |
| Van Belle, 1994a                      | Low     | Unclear | Unclear | Unclear | Unclear | Unclear | Unclear | Unclear | Unclear |
| Van Belle, 1994b                      | Low     | Unclear | Unclear | Unclear | Unclear | Unclear | Unclear | Unclear | Unclear |
| Beck, 1993                            | Unclear | Unclear | Low     | Low     | High    | Unclear | Unclear | Unclear | Unclear |
| Bosi, 1993                            | Low     | Unclear | Unclear | Low     | Unclear | Low     | Unclear | Unclear | Low     |
| Buser, 1993                           | Unclear | Unclear | Unclear | Low     | Unclear | Unclear | Unclear | Unclear | High    |
| Chevallier, 1993                      | Low     | High    | Unclear | Low     | Unclear | High    | Unclear | Unclear | Low     |
| Cunningham, 1993                      | Unclear | Unclear | Unclear | Low     | Unclear | Unclear | Unclear | Unclear | High    |
| Grunberg, 1993                        | Low     | Low     | Unclear | Low     | Low     | Low     | Low     | Unclear | High    |
| Herrstedt, 1993                       | Unclear | Low     | Unclear | Unclear | Low     | Unclear | Unclear | Unclear | Low     |
| Hunter, 1993                          | Unclear | Low     | Unclear | Low     | Unclear | Unclear | Low     | Unclear | High    |
| Jantunen, 1993                        | Unclear | High    | Unclear | Low     | Unclear | High    | Unclear | Unclear | Unclear |
| Levitt, 1993                          | Low     | Low     | Low     | Low     | Unclear | Low     | Unclear | Unclear | Unclear |
| Madej, 1993                           | Unclear | Unclear | Unclear | Low     | Unclear | Unclear | Unclear | Unclear | Unclear |
| Rath, 1993                            | Unclear | Unclear | Unclear | Low     | Unclear | Unclear | Unclear | Unclear | High    |
| Smith (Granisetron Study Group), 1993 | Unclear | Unclear | Unclear | Low     | Low     | Unclear | Low     | Unclear | Unclear |
| Beck, 1992                            | Low     | Unclear | Unclear | Low     | Unclear | Unclear | Unclear | Unclear | Unclear |
| Bots, 1992                            | Unclear | Unclear | Unclear | Low     | Unclear | Unclear | Unclear | Unclear | High    |
| Dicato, 1992                          | Low     | Unclear | Unclear | Low     | Low     | Unclear | Unclear | Unclear | High    |
| Jantunen, 1992                        | Unclear | Unclear | Unclear | Low     | Low     | Unclear | Unclear | Unclear | Unclear |
| Seynaeve, 1992                        | Low     | Unclear | Low     | Low     | Low     | Unclear | Low     | Unclear | High    |
| Sledge, 1992                          | Low     | Unclear | Unclear | Low     | Low     | Unclear | Low     | Unclear | High    |
| Soukop, 1992                          | Low     | Unclear | Unclear | Low     | Unclear | Low     | Unclear | Unclear | Unclear |
| Gandara, 1991                         | Unclear | Unclear | Unclear | Unclear | Unclear | Unclear | Low     | Unclear | Unclear |
| Hainsworth, 1991                      | Low     | Low     | Low     | Low     | Low     | Low     | Low     | Unclear | High    |
| Jones, 1991                           | Low     | Low     | Unclear | Low     | High    | Low     | Unclear | Unclear | High    |
| Marschner, 1991                       | Unclear | Low     | Low     | Low     | Low     | Unclear | Unclear | Low     | Unclear |
| Roila, 1991                           | Unclear | Unclear | Unclear | Low     | Unclear | Unclear | Unclear | Unclear | Unclear |
| Smith, 1991                           | Unclear | Unclear | Unclear | Unclear | Unclear | Unclear | Unclear | Unclear | High    |
| Smyth, 1991                           | Low     | Low     | Unclear | Low     | Low     | Unclear | Unclear | Unclear | High    |
| Warr, 1991                            | Low     | Unclear | Unclear | Unclear | High    | Unclear | Unclear | Unclear | Unclear |
| Bonnetterre, 1990                     | Unclear | Unclear | Unclear | Unclear | High    | Unclear | Unclear | Unclear | High    |
| Cubeddu, 1990a                        | Unclear | Unclear | Unclear | Low     | Unclear | Low     | Unclear | Unclear | High    |
| Cubeddu, 1990b                        | Low     | Unclear | Unclear | Low     | Unclear | Unclear | Unclear | Unclear | High    |
| Cupissol, 1990                        | Unclear | Unclear | Unclear | Unclear | Unclear | Unclear | Unclear | Unclear | Unclear |
| De Mulder, 1990                       | Low     | Low     | Unclear | Low     | Unclear | Unclear | Low     | Unclear | High    |
| Falkson, 1990                         | Unclear | Unclear | Unclear | Unclear | Unclear | Unclear | Unclear | Unclear | Unclear |
| Kaasa, 1990                           | Unclear | Unclear | Unclear | Low     | Low     | Unclear | Low     | Unclear | High    |
| Khojasteh, 1990                       | Low     | High    | Unclear | Low     | High    | High    | Unclear | Unclear | High    |
| Marty, 1990a                          | Unclear | Unclear | Unclear | Low     | Unclear | Unclear | Unclear | Low     | Unclear |

*Non-Randomized Controlled Trials (n=33)*

|                  |         |         |         |         |         |         |         |         |         |
|------------------|---------|---------|---------|---------|---------|---------|---------|---------|---------|
| Gabrail, 2015(a) | High    | Unclear | Unclear | High    | High    | Unclear | Unclear | Unclear | Unclear |
| Kim JS, 2014     | Unclear | Unclear | Low     | Low     | Low     | High    | Unclear | Unclear | Unclear |
| Abali, 2007      | High    | High    | Unclear | Unclear | Unclear | High    | Unclear | Unclear | Unclear |
| Tan, 2004        | High    | High    | Unclear | Low     | Low     | High    | Low     | Unclear | High    |

|                  |         |         |         |         |         |         |         |         |         |         |
|------------------|---------|---------|---------|---------|---------|---------|---------|---------|---------|---------|
| Carmichael, 2003 | Unclear | Unclear | Unclear | Unclear | Low     | Unclear | Unclear | Unclear | Unclear | High    |
| Raynov, 2002     | High    | Unclear | Unclear | Unclear | Low     | High    | Unclear | Unclear | Unclear | High    |
| Yamac, 2002      | High    | High    | Unclear | Unclear | Unclear | Unclear | Unclear | Unclear | Unclear | Unclear |
| Liaw, 2001       | High    | High    | Unclear | Unclear | Unclear | High    | Low     | Low     | Unclear | Unclear |
| Watters, 2001    | High    | Unclear | Unclear | Low     | High    | Unclear | Unclear | Unclear | Unclear | Unclear |
| Zeng, 2001       | High    | High    | Unclear | Unclear | Unclear | Unclear | Unclear | Unclear | Unclear | Unclear |
| Coppes, 1999a    | High    | High    | Unclear | Unclear | Unclear | Unclear | Unclear | Unclear | Unclear | High    |
| Coppes, 1999b    | High    | High    | Low     | Low     | Unclear | Unclear | Unclear | Unclear | Unclear | High    |
| Tsavaris, 1999   | High    | High    | High    | Unclear | Unclear | High    | Unclear | Unclear | Unclear | Unclear |
| Kris, 1998       | High    | High    | Unclear | Unclear | Low     | Unclear | Low     | Unclear | Unclear | Unclear |
| Chang, 1997      | High    | High    | Unclear | Unclear | Low     | Unclear | Unclear | Unclear | Unclear | Low     |
| Belkacemi, 1996  | High    | High    | Unclear | Unclear | Low     | Unclear | Unclear | Unclear | Unclear | Unclear |
| Gaedicke, 1996   | High    | High    | Low     | Low     | High    | Low     | Low     | Unclear | Unclear | High    |
| Hesketh, 1996a   | High    | High    | Low     | Low     | Low     | High    | Low     | Unclear | Unclear | High    |
| Hesketh, 1995    | High    | High    | Unclear | High    | Low     | High    | Unclear | Unclear | Unclear | High    |
| Conroy, 1994     | High    | High    | Unclear | High    | Unclear | High    | Unclear | Unclear | Unclear | High    |
| Kris, 1994       | High    | High    | Unclear | Unclear | Unclear | Unclear | Unclear | Unclear | Unclear | Unclear |
| Merrouche, 1994  | High    | High    | Unclear | Unclear | Low     | Unclear | Low     | Low     | Unclear | High    |
| de Wet, 1993     | High    | High    | Unclear | Unclear | Unclear | High    | Unclear | Unclear | Unclear | Unclear |
| Pisters, 1993    | High    | Unclear | Unclear | Unclear | Low     | Low     | Unclear | Unclear | Unclear | Unclear |
| Ribiero, 1993    | High    | High    | Unclear | High    | Unclear | Unclear | Low     | Unclear | Unclear | High    |
| Dundee, 1992     | High    | High    | Unclear | Unclear | Unclear | High    | Unclear | Unclear | Unclear | Unclear |
| Fraschini, 1991  | High    | High    | Low     | Low     | Low     | High    | Unclear | Unclear | Unclear | High    |
| Lemerle, 1991    | High    | High    | Unclear | Unclear | Unclear | High    | Unclear | Unclear | Unclear | Unclear |
| Seynaeve, 1991   | High    | High    | Unclear | Unclear | Low     | Unclear | Unclear | Unclear | Unclear | High    |
| Addelman, 1990   | High    | Unclear | Unclear | Unclear | Low     | Unclear | Unclear | Unclear | Unclear | Unclear |
| Cunningham, 1989 | High    | High    | Unclear | Unclear | Unclear | High    | Unclear | Unclear | Unclear | Unclear |
| Grunberg, 1989   | High    | High    | Low     | Low     | Low     | Unclear | Low     | Unclear | Unclear | Unclear |
| De Hann, 1988    | High    | Unclear | Unclear | Unclear | Unclear | Unclear | Unclear | Unclear | High    | High    |

**Controlled Before and After Study (n=1)**

|                |      |      |         |         |         |      |         |      |         |         |
|----------------|------|------|---------|---------|---------|------|---------|------|---------|---------|
| Rzepecki, 2009 | High | High | Unclear | Unclear | Unclear | High | Unclear | High | Unclear | Unclear |
|----------------|------|------|---------|---------|---------|------|---------|------|---------|---------|

**Abbreviations:** EPOC - Effective Practice and Organisation of Care; High - high risk of bias; Low - low risk of bias; Unclear - unclear risk of bias

\* Includes unpublished data (Tabei 2006, Kadota 2007, Piyush 2011)

**Items:**

1. Random sequence generation
2. Allocation concealment
3. Similar baseline outcome measures
4. Similar baseline characteristics
5. Incomplete outcome data
6. Blinding of outcome assessor
7. Contamination
8. Selective outcome reporting
9. Other bias

## Appendix F. Newcastle-Ottawa Scale Appraisal Results

| Author, year       | 1 | 2 | 3 | 4 | 5 | 6 | 7 |
|--------------------|---|---|---|---|---|---|---|
| Anvari, 2015       | A | A | A | B | A | D | D |
| Zoto, 2015         | B | A | A | A | B | C | C |
| Murakami, 2014     | B | A | A | B | C | C | B |
| Keat, 2013         | B | A | A | B | A | C | C |
| Blazer, 2012       | B | A | A | B | B | A | D |
| Pielichowski, 2011 | C | A | D | B | A | D | D |
| Taguchi, 2009      | B | A | A | B | C | B | D |
| Carreca, 2007*     | B | A | D | B | C | C | D |
| Hamadani, 2007     | C | A | A | B | C | B | B |
| Adel, 2006*        | B | A | A | B | C | A | D |
| Shikimori, 2006    | A | A | D | B | A | D | D |
| Trifilio, 2006*    | B | A | A | B | C | A | D |
| Babaoglu, 2005     | A | A | A | B | C | C | C |
| Dempsey, 2004      | B | C | A | B | A | A | D |
| Steiner, 2003      | C | A | A | A | A | B | A |
| Brown, 1998        | C | A | A | B | C | B | D |
| Farley, 1997       | B | A | C | B | A | B | D |
| Harris, 1997       | A | A | A | B | A | D | A |
| Blijham, 1992      | A | C | A | B | C | D | D |

\* Includes unpublished data (Adel 2006, Trifilio 2006, Carreca 2007)

### Items:

1. Representativeness of the exposed cohort: A - truly representative of the average participant undergoing chemotherapy; B - somewhat representative of the average participant undergoing chemotherapy; C - selected group of users
2. Selection of the non-exposed cohort: A - drawn from the same community as the exposed cohort; C - no description of the derivation of the non-exposed cohort
3. Ascertainment of exposure: A - secure record; C - written self report; D - no description
4. Demonstration that outcome of interest was not present at start of study: A - yes; B - no
5. Comparability of cohorts on the basis of the design or analysis: A - study controls for most important factors (e.g., age, gender); B - study controls for any additional factor; C - nothing is controlled for
6. Assessment of outcome: A - independent blind assessment; B - record linkage; C - self-report; D - no description
7. Adequacy of follow up of cohorts: A - complete follow up, all subjects accounted for; B - subjects lost to follow up unlikely to introduce bias - small number lost (<10%) and description of those lost; C - large number lost (>10%) and no description of those lost; D - no statement

**Appendix G. Comparison Adjusted Funnel Plots for patients without nausea, patients without vomiting, patients without CINV, and patients experiencing severe vomiting outcomes**

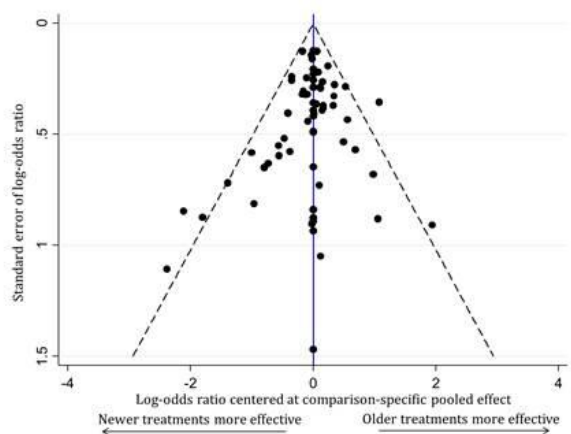

**PATIENTS WITHOUT NAUSEA**

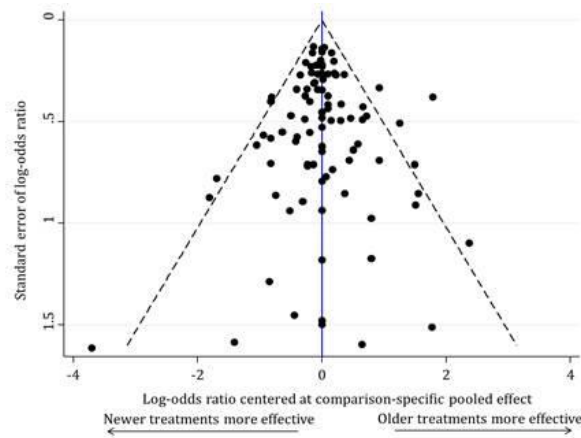

**PATIENTS WITHOUT VOMITING**

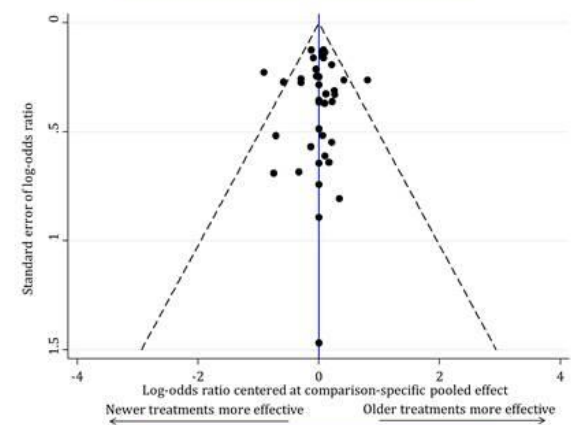

**PATIENTS WITHOUT CINV**

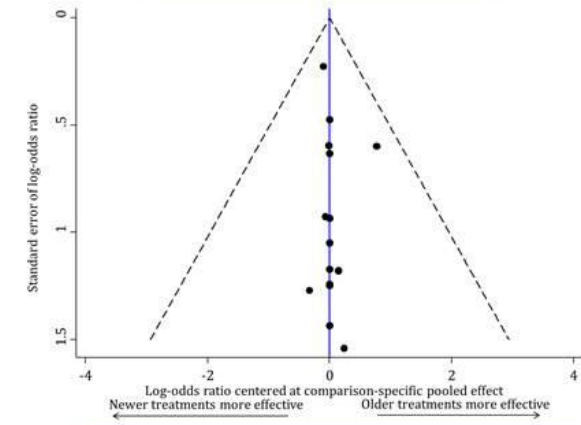

**PATIENTS EXPERIENCING SEVERE VOMITING**

**Abbreviations:** CINV – chemotherapy-induced nausea and vomiting

## Appendix H. Results for harms outcomes analyses

| Treatment Comparison                                                                                                       | # of head-to-head studies | OR (95% CI)*      | OR (95% CI)†      |
|----------------------------------------------------------------------------------------------------------------------------|---------------------------|-------------------|-------------------|
| <b>Arrhythmia: 3 studies and 627 patients were included in NMA</b>                                                         |                           |                   |                   |
| Granisetron vs Dolasetron                                                                                                  | 1                         | 0.21 (0.02-1.84)  | 0.21 (0.02-1.84)  |
| Granisetron+Dexamethasone vs Dolasetron                                                                                    | NA                        | 0.66 (0.01-32.72) | NA                |
| Palonosetron vs Dolasetron                                                                                                 | NA                        | 0.34 (0.03-3.63)  | NA                |
| Granisetron+Dexamethasone vs Granisetron                                                                                   | 1                         | 3.12 (0.12-80.39) | 3.12 (0.12-80.39) |
| Palonosetron vs Granisetron                                                                                                | 1                         | 1.59 (0.58-4.30)  | 1.59 (0.58-4.30)  |
| Palonosetron vs Granisetron+Dexamethasone                                                                                  | NA                        | 0.51 (0.02-15.19) | NA                |
| <i>Between-study variance estimated in NMA model</i>                                                                       |                           | NA                | NA                |
| <i>Design-by-treatment interaction model for inconsistency <math>\chi^2</math> (d.f., P-value, Between-study variance)</i> |                           | NA (star-network) |                   |
| <b>Mortality: 8 studies and 4,823 adults were included in NMA and pairwise MA</b>                                          |                           |                   |                   |
| Granisetron+Dexamethasone vs Granisetron                                                                                   | 1                         | 0.71 (0.18-2.83)  | 1.02 (0.20-5.15)  |
| Metoclopramide+Dexamethasone vs Granisetron                                                                                | 1                         | 1.11 (0.26-4.76)  | 1.32 (0.29-6.04)  |
| Ondansetron vs Granisetron                                                                                                 | 1                         | 0.63 (0.18-2.19)  | 0.49 (0.12-1.96)  |
| Ondansetron+Dexamethasone vs Granisetron                                                                                   | NA                        | 0.47 (0.10-2.19)  | NA                |
| Palonosetron+Dexamethasone vs Granisetron                                                                                  | NA                        | 0.23 (0.04-1.42)  | NA                |
| Tropisetron vs Granisetron                                                                                                 | NA                        | 1.86 (0.06-58.30) | NA                |
| Metoclopramide+Dexamethasone vs Granisetron+Dexamethasone                                                                  | 1                         | 1.55 (0.36-6.66)  | 1.30 (0.28-5.93)  |
| Ondansetron vs Granisetron+Dexamethasone                                                                                   | NA                        | 0.88 (0.19-4.12)  | NA                |
| Ondansetron+Dexamethasone vs Granisetron+Dexamethasone                                                                     | 1                         | 0.66 (0.17-2.53)  | 1.07 (0.18-6.44)  |
| Palonosetron+Dexamethasone vs Granisetron+Dexamethasone                                                                    | 3                         | 0.32 (0.09-1.14)  | 0.33 (0.09-1.18)  |
| Tropisetron vs Granisetron+Dexamethasone                                                                                   | NA                        | 2.61 (0.07-91.76) | NA                |
| Ondansetron vs Metoclopramide+Dexamethasone                                                                                | NA                        | 0.57 (0.10-3.35)  | NA                |
| Ondansetron+Dexamethasone vs Metoclopramide+Dexamethasone                                                                  | NA                        | 0.43 (0.07-2.59)  | NA                |
| Palonosetron+Dexamethasone vs Metoclopramide+Dexamethasone                                                                 | NA                        | 0.20 (0.03-1.39)  | NA                |
| Tropisetron vs Metoclopramide+Dexamethasone                                                                                | NA                        | 1.68 (0.04-65.79) | NA                |
| Ondansetron+Dexamethasone vs Ondansetron                                                                                   | 2                         | 0.75 (0.19-2.88)  | 0.53 (0.11-2.58)  |
| Palonosetron+Dexamethasone vs                                                                                              | NA                        | 0.36 (0.05-2.47)  | NA                |

|                                                                                                                                                                          |    |                     |                   |
|--------------------------------------------------------------------------------------------------------------------------------------------------------------------------|----|---------------------|-------------------|
| Ondansetron                                                                                                                                                              |    |                     |                   |
| Tropisetron vs Ondansetron                                                                                                                                               | 1  | 2.95 (0.12-73.13)   | 2.95 (0.12-73.13) |
| Palonosetron+Dexamethasone vs Ondansetron+Dexamethasone                                                                                                                  | 1  | 0.48 (0.08-2.74)    | 0.56 (0.03-10.83) |
| Tropisetron vs Ondansetron+Dexamethasone                                                                                                                                 | NA | 3.95 (0.12-128.78)  | NA                |
| Tropisetron vs Palonosetron+Dexamethasone                                                                                                                                | NA | 8.25 (0.19-350.11)  | NA                |
| <i>Between-study variance estimated in NMA model</i>                                                                                                                     |    | 0.00                | 0.00              |
| <i>Design-by-treatment interaction model for inconsistency <math>\chi^2</math> (d.f., P-value, Between-study variance)</i>                                               |    | 0.8 (2, 0.67, 0.00) |                   |
| <b>QTc prolongation: 4 studies and 3358 patients were included in NMA</b>                                                                                                |    |                     |                   |
| Granisetron + Dexamethasone vs Dolasetron ± Dexamethasone                                                                                                                | NA | 0.08 (0.00-1.82)    | NA                |
| Ondansetron ± Dexamethasone IV vs Dolasetron ± Dexamethasone                                                                                                             | 1  | 0.34 (0.24-0.47)    | 0.34 (0.24-0.47)  |
| Palonosetron + Dexamethasone vs Dolasetron ± Dexamethasone                                                                                                               | NA | 0.07 (0.00-1.41)    | NA                |
| Ondansetron ± Dexamethasone IV vs Granisetron + Dexamethasone                                                                                                            | NA | 4.28 (0.19-97.30)   | NA                |
| Palonosetron + Dexamethasone vs Granisetron + Dexamethasone                                                                                                              | 1  | 0.84 (0.42-1.68)    | 0.84 (0.42-1.68)  |
| Palonosetron + Dexamethasone vs Ondansetron ± Dexamethasone IV                                                                                                           | 1  | 0.20 (0.01-4.10)    | 0.20 (0.01-4.10)  |
| <i>Between-study variance estimated in NMA model</i>                                                                                                                     |    | 0.00                | NA                |
| <i>Design-by-treatment interaction model for inconsistency <math>\chi^2</math> (d.f., P-value, Between-study variance)</i>                                               |    | NA                  |                   |
| <b>Sudden Cardiac Death: 1 study and 696 patients; NMA and pairwise MA were not feasible</b>                                                                             |    |                     |                   |
| Ondansetron vs Ondansetron +Dexamethasone                                                                                                                                | 1  | NA                  | 2.73 (0.11-67.80) |
| <i>Between-study variance estimated in NMA model</i>                                                                                                                     |    | NA                  | NA                |
| <b>QRS interval: 1 study and 696 patients; NMA and pairwise MA were not feasible</b>                                                                                     |    |                     |                   |
| Ondansetron _d1-7 ± Dexamethasone _d1-7 vs Dolasetron± Dexamethasone                                                                                                     | 1  | NA                  | 0.29 (0.19-0.48)  |
| <i>Between-study variance estimated in NMA model</i>                                                                                                                     |    | NA                  | NA                |
| <b>Delirium: 1 study and 357 patients; NMA and pairwise MA were not feasible</b>                                                                                         |    |                     |                   |
| Metoclopramide+Dexamethasone vs Granisetron                                                                                                                              | 1  | NA                  | 4.14 (0.86-19.93) |
| Metoclopramide+Dexamethasone vs Granisetron+Dexamethasone                                                                                                                | 1  | NA                  | 4.07 (0.85-19.59) |
| Granisetron vs Granisetron+Dexamethasone                                                                                                                                 | 1  | NA                  | 0.98 (0.01-7.10)  |
| <i>Between-study variance estimated in NMA model</i>                                                                                                                     |    | NA                  | NA                |
| <b>Abbreviations:</b> CI - confidence interval; MA - meta-analysis; NA - not applicable; NMA - network meta-analysis; OR - odds ratio; RCT - randomized controlled trial |    |                     |                   |
| *Network Meta-analysis results                                                                                                                                           |    |                     |                   |
| †Meta-analysis results                                                                                                                                                   |    |                     |                   |





## Appendix I. Aggregate Mcharms appraisal results

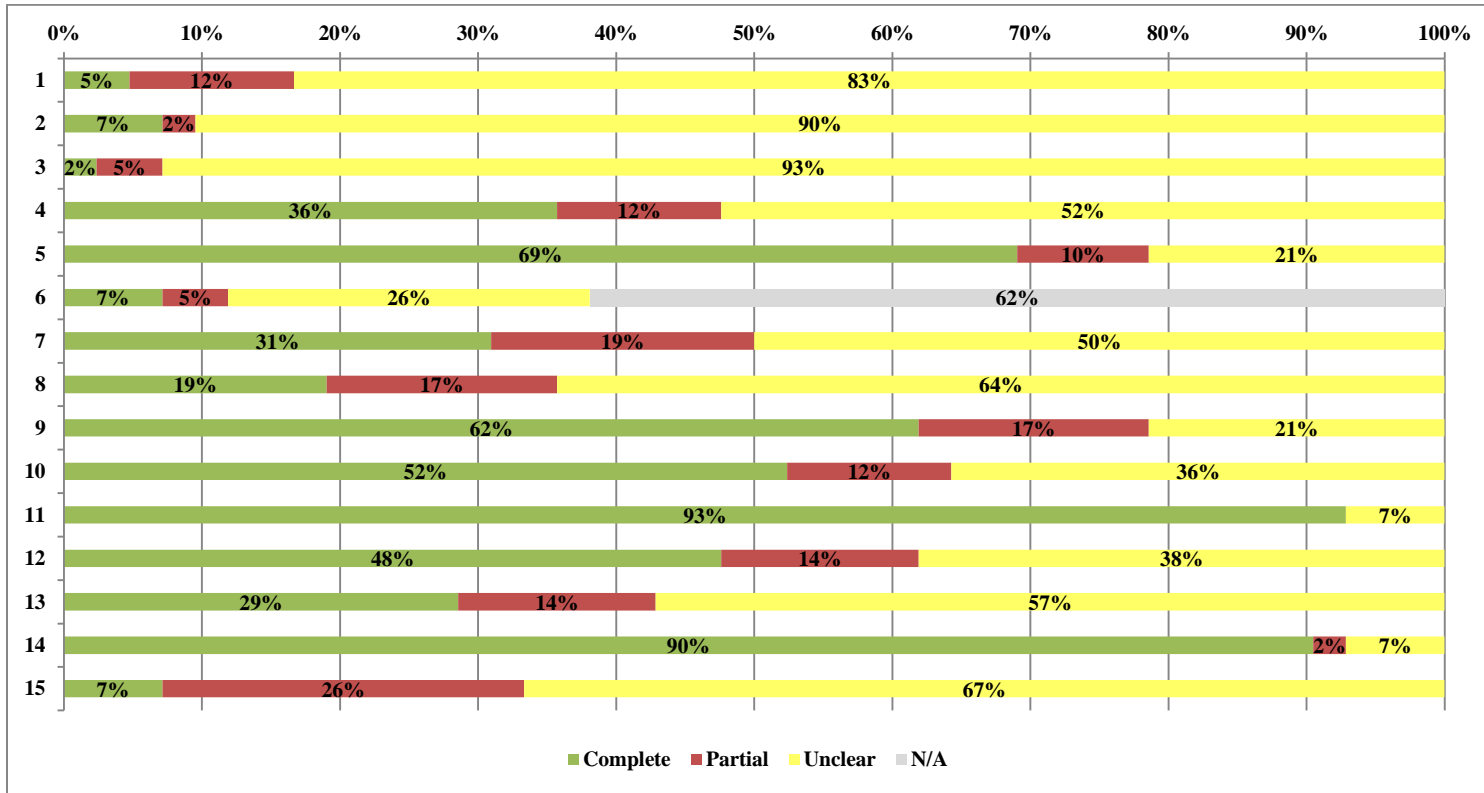

Abbreviations: N/A – not applicable

### Items:

1. Were the harms PREDEFINED using standard or precise definitions?
2. Were SERIOUS events precisely defined?
3. Were SEVERE events precisely defined?
4. Were the number of DEATHS in each study group specified or were the reason(s) for not specifying given?
5. Was the mode of harms collection specified as ACTIVE?
6. Was the mode of harms collection specified as PASSIVE?
7. Did the study specify WHO collected the harms?

8. Did the study specify the TRAINING or BACKGROUND of who ascertained the harms?
9. Did the study specify the TIMING and FREQUENCY of collection of the harms?
10. Did the authors use STANDARD scales or checklists for harms collection?
11. Did the authors specify if the harms reported encompass ALL the events collected or a selected SAMPLE?
12. Was the overall number of participants that withdrew or were lost to follow-up, including each reason why, specified for each study group?
13. Was the NUMBER of participants who withdrew due to harms specified for each study group?
14. Did the author(s) specify the NUMBER and type of harmful events for each study group?
15. Did the author(s) specify the type of analyses undertaken for harms data?

## Appendix J. Results for Mcharms appraisal

| Author, year                                | 1 | 2 | 3 | 4 | 5  | 6  | 7 | 8 | 9 | 10 | 11 | 12 | 13 | 14 | 15 |
|---------------------------------------------|---|---|---|---|----|----|---|---|---|----|----|----|----|----|----|
| <i>Randomized clinical trials (n=39)</i>    |   |   |   |   |    |    |   |   |   |    |    |    |    |    |    |
| Abang, 2000                                 | U | U | U | C | P  | U  | U | U | C | U  | C  | C  | U  | C  | U  |
| Addelman, 1990                              | U | U | U | P | C  | NA | C | C | C | C  | C  | P  | P  | P  | U  |
| Audhuy, 1996                                | U | U | U | U | C  | NA | P | U | C | C  | C  | U  | U  | C  | P  |
| Boccia, 2011                                | U | U | U | C | C  | NA | C | P | U | C  | C  | C  | C  | C  | U  |
| Chevallier, 1993                            | P | C | U | C | C  | NA | C | P | C | C  | C  | U  | U  | C  | P  |
| De Mulder, 1990                             | U | U | U | P | P  | P  | P | U | C | U  | C  | P  | P  | C  | P  |
| Dong, 2011                                  | U | U | U | U | U  | U  | U | U | U | P  | U  | U  | U  | C  | U  |
| du Bois, 1997                               | U | U | U | C | U  | U  | U | U | U | U  | C  | C  | C  | C  | U  |
| Eisenberg, 2003                             | U | U | U | C | P  | U  | U | U | C | U  | C  | C  | C  | C  | U  |
| Fauser, 1996a                               | U | U | U | C | C  | NA | U | U | C | C  | C  | U  | U  | C  | P  |
| Ghosh, 2010                                 | U | U | U | C | C  | NA | U | U | U | C  | C  | U  | U  | C  | U  |
| Grote, 1997                                 | U | U | U | U | C  | NA | C | C | C | C  | C  | C  | C  | U  | P  |
| Heron, 1994                                 | U | U | U | U | U  | P  | U | U | C | U  | C  | C  | U  | C  | P  |
| Hesketh, 1996b                              | U | U | U | P | C  | NA | U | U | P | C  | C  | C  | U  | C  | U  |
| Hunter, 1993                                | U | U | U | C | U  | U  | U | U | U | C  | C  | P  | C  | P  | U  |
| Jones, 1991                                 | U | U | U | P | C  | C  | C | C | P | U  | C  | P  | P  | C  | U  |
| Kaasa, 1990                                 | U | U | U | U | C  | U  | U | U | U | U  | C  | U  | U  | C  | U  |
| Kasimis, 1997                               | U | U | U | U | C  | NA | U | U | C | C  | C  | U  | U  | C  | U  |
| Kim, 2015                                   | U | U | U | U | C  | NA | P | P | C | C  | C  | P  | U  | C  | U  |
| Kovacs, 2016                                | C | C | C | C | NA | C  | P | C | C | C  | C  | C  | C  | C  | P  |
| Lemerle, 1991                               | U | U | U | U | C  | NA | U | U | C | C  | C  | U  | U  | C  | U  |
| Lofters, 1997                               | U | U | U | C | C  | NA | U | U | C | C  | C  | C  | U  | C  | U  |
| Marschner, 1991                             | U | U | U | U | U  | C  | U | U | U | U  | U  | C  | C  | C  | U  |
| Matsuoka, 2003                              | U | U | U | U | C  | NA | C | C | C | C  | C  | C  | C  | C  | U  |
| Mattiuzzi, 2010                             | U | U | U | U | U  | U  | U | U | U | U  | C  | C  | P  | C  | U  |
| Park, 1997                                  | U | U | U | U | U  | U  | U | U | P | U  | C  | U  | U  | C  | U  |
| Perez, 1998b                                | U | U | U | U | C  | NA | C | P | C | P  | C  | C  | C  | C  | U  |
| Perez, 1997                                 | U | U | U | U | C  | NA | U | U | P | U  | C  | U  | U  | C  | U  |
| Pinarli, 2006                               | C | U | U | U | C  | NA | C | C | C | C  | C  | U  | U  | C  | C  |
| Raftopolous, 2015                           | P | P | C | C | NA | P  | U | P | P | C  | C  | C  | C  | C  | P  |
| Rubenstein, 1997                            | U | U | U | U | C  | NA | U | U | C | C  | C  | U  | U  | C  | U  |
| Saito, 2009                                 | U | U | U | C | C  | NA | P | U | C | C  | C  | C  | U  | C  | U  |
| Sanmukhani, 2014                            | P | U | P | U | C  | NA | C | P | P | P  | P  | C  | C  | C  | P  |
| Smith (Granisetron Study Group), 1993       | U | C | U | C | C  | NA | C | P | C | C  | C  | C  | C  | C  | C  |
| Tian, 2011                                  | U | U | U | U | C  | NA | P | U | C | C  | C  | C  | C  | C  | C  |
| Tsavaris, 1995b                             | P | U | U | U | C  | U  | U | U | C | U  | C  | U  | U  | C  | P  |
| Warr, 1991                                  | U | U | U | U | U  | U  | U | U | P | U  | C  | U  | U  | C  | U  |
| Wenzell, 2013                               | U | U | U | U | U  | U  | U | U | U | U  | U  | P  | U  | U  | U  |
| Van Belle, 1994b                            | U | U | U | P | C  | NA | P | C | C | C  | C  | P  | P  | C  | U  |
| <i>Non Randomized Clinical trials (n=3)</i> |   |   |   |   |    |    |   |   |   |    |    |    |    |    |    |
| Carmichael, 2003                            | U | U | U | U | P  | C  | P | U | C | P  | C  | U  | U  | C  | U  |
| Coppes, 1999b                               | P | U | U | C | C  | NA | C | C | C | C  | C  | U  | U  | U  | U  |
| Coppes, 1999a                               | U | U | U | C | C  | NA | C | C | C | C  | C  | C  | U  | C  | U  |

**Abbreviations:** C - complete; NA - not applicable; P - partial; U - unclear

### Items:

1. Were the harms PREDEFINED using standard or precise definitions?
2. Were SERIOUS events precisely defined?
3. Were SEVERE events precisely defined?
4. Were the number of DEATHS in each study group specified or were the reason(s) for not specifying given?
5. Was the mode of harms collection specified as ACTIVE?
6. Was the mode of harms collection specified as PASSIVE?
7. Did the study specify WHO collected the harms?
8. Did the study specify the TRAINING or BACKGROUND of who ascertained the harms?
9. Did the study specify the TIMING and FREQUENCY of collection of the harms?
10. Did the authors use STANDARD scales or checklists for harms collection?
11. Did the authors specify if the harms reported encompass ALL the events collected or a selected SAMPLE?
12. Was the overall number of participants that withdrew or were lost to follow-up, including each reason why, specified for each study?

---

group?

13. Was the NUMBER of participants who withdrew due to harms specified for each study group?
  14. Did the author(s) specify the NUMBER and type of harmful events for each study group?
  15. Did the author(s) specify the type of analyses undertaken for harms data?
-

## Appendix K. Results of the primary Network meta-analysis for effectiveness outcomes

| Treatment Comparison                                              | # of head to head studies | NMA estimate: OR (95% CI) | MA estimate: OR (95% CI)*     |
|-------------------------------------------------------------------|---------------------------|---------------------------|-------------------------------|
| <b>No. of patients without nausea - 44 RCTs and 11,664 adults</b> |                           |                           |                               |
| Ondansetron+Steroid vs Granisetron+Steroid                        | 5                         | 1.03 (0.90-1.18)          | 1.04 (0.90-1.20) <sup>a</sup> |
| Ondansetron+Steroid vs Ondansetron                                | 8                         | 1.96 (1.59-2.41)          | 2.16 (1.45-3.23) <sup>b</sup> |
| Ondansetron+Steroid vs Granisetron                                | 1                         | 2.00 (1.63-2.45)          | 21.00 (3.35-131.51)           |
| Ondansetron+Steroid vs Dolasetron                                 | NA                        | 2.09 (1.47-2.97)          | NA                            |
| Ondansetron+Steroid vs Dolasetron+Steroid                         | NA                        | 0.44 (0.20-0.96)          | NA                            |
| Ondansetron+Steroid vs Palonosetron                               | NA                        | 1.60 (1.06-2.41)          | NA                            |
| Ondansetron+Steroid vs Palonosetron+Steroid                       | 1                         | 1.05 (0.80-1.36)          | 0.56 (0.20-1.59)              |
| Ondansetron+Steroid vs Tropisetron                                | 1                         | 2.40 (1.49-3.88)          | 7.20 (2.03-25.51)             |
| Ondansetron+Steroid vs Tropisetron+Steroid                        | NA                        | 0.57 (0.26-1.24)          | NA                            |
| Ondansetron+Steroid vs Ramosetron                                 | NA                        | 1.40 (0.84-2.33)          | NA                            |
| Ondansetron+Steroid vs Ramosetron+Steroid                         | NA                        | 0.69 (0.38-1.26)          | NA                            |
| Ondansetron+Steroid vs Placebo                                    | NA                        | 337.68 (18.89-6,035.72)   | NA                            |
| Granisetron+Steroid vs Ondansetron                                | 1                         | 1.91 (1.55-2.34)          | 3.39 (0.66-17.56)             |
| Granisetron+Steroid vs Granisetron                                | 6                         | 1.95 (1.62-2.34)          | 1.96 (1.54-2.50) <sup>c</sup> |
| Granisetron+Steroid vs Dolasetron                                 | NA                        | 2.04 (1.44-2.87)          | NA                            |
| Granisetron+Steroid vs Dolasetron+Steroid                         | NA                        | 0.43 (0.20-0.93)          | NA                            |
| Granisetron+Steroid vs Palonosetron                               | NA                        | 1.55 (1.04-2.33)          | NA                            |
| Granisetron+Steroid vs Palonosetron+Steroid                       | 1                         | 1.02 (0.81-1.28)          | 1.05 (0.83-1.33)              |
| Granisetron+Steroid vs Tropisetron                                | 1                         | 2.34 (1.45-3.77)          | 7.20 (1.29-40.05)             |
| Granisetron+Steroid vs Tropisetron+Steroid                        | NA                        | 0.55 (0.25-1.21)          | NA                            |
| Granisetron+Steroid vs Ramosetron                                 | NA                        | 1.36 (0.82-2.24)          | NA                            |
| Granisetron+Steroid vs Ramosetron+Steroid                         | 1                         | 0.67 (0.37-1.21)          | 0.73 (0.28-1.90)              |
| Granisetron+Steroid vs Placebo                                    | NA                        | 328.52 (18.40-5,864.44)   | NA                            |
| Ondansetron vs Granisetron                                        | 11                        | 1.02 (0.88-1.18)          | 1.03 (0.87-1.22) <sup>d</sup> |
| Ondansetron vs Dolasetron                                         | 2                         | 1.07 (0.79-1.45)          | 1.12 (0.69-1.82) <sup>e</sup> |
| Ondansetron vs Dolasetron+Steroid                                 | NA                        | 0.22 (0.10-0.48)          | NA                            |
| Ondansetron vs Palonosetron                                       | 1                         | 0.82 (0.56-1.19)          | 1.03 (0.33-3.22)              |
| Ondansetron vs Palonosetron+Steroid                               | NA                        | 0.53 (0.39-0.73)          | NA                            |
| Ondansetron vs Tropisetron                                        | 3                         | 1.23 (0.79-1.91)          | 1.76 (0.65-4.76) <sup>f</sup> |
| Ondansetron vs Tropisetron+Steroid                                | NA                        | 0.29 (0.13-0.62)          | NA                            |
| Ondansetron vs Ramosetron                                         | NA                        | 0.71 (0.43-1.18)          | NA                            |
| Ondansetron vs Ramosetron+Steroid                                 | NA                        | 0.35 (0.19-0.64)          | NA                            |
| Ondansetron vs Placebo                                            | NA                        | 172.34 (9.67-3,070.30)    | NA                            |
| Granisetron vs Dolasetron                                         | 1                         | 1.05 (0.78-1.41)          | 0.97 (0.62-1.53)              |
| Granisetron vs Dolasetron+Steroid                                 | NA                        | 0.22 (0.10-0.47)          | NA                            |
| Granisetron vs Palonosetron                                       | 1                         | 0.80 (0.55-1.15)          | 0.79 (0.45-1.40)              |
| Granisetron vs Palonosetron+Steroid                               | NA                        | 0.52 (0.39-0.70)          | NA                            |
| Granisetron vs Tropisetron                                        | 2                         | 1.20 (0.76-1.90)          | 0.93 (0.15-5.60) <sup>g</sup> |
| Granisetron vs Tropisetron+Steroid                                | NA                        | 0.28 (0.13-0.61)          | NA                            |
| Granisetron vs Ramosetron                                         | 2                         | 0.70 (0.43-1.13)          | 0.79 (0.31-2.01) <sup>h</sup> |
| Granisetron vs Ramosetron+Steroid                                 | NA                        | 0.34 (0.19-0.62)          | NA                            |
| Granisetron vs Placebo                                            | 1                         | 168.85 (9.51-2,996.71)    | 169.00 (9.52-2,999.80)        |
| Dolasetron vs Dolasetron+Steroid                                  | 1                         | 0.21 (0.10-0.42)          | 0.21 (0.10-0.42)              |
| Dolasetron vs Palonosetron                                        | 1                         | 0.76 (0.54-1.07)          | 0.74 (0.50-1.12)              |
| Dolasetron vs Palonosetron+Steroid                                | NA                        | 0.50 (0.33-0.76)          | NA                            |
| Dolasetron vs Tropisetron                                         | NA                        | 1.15 (0.67-1.96)          | NA                            |

|                                             |    |                          |                               |
|---------------------------------------------|----|--------------------------|-------------------------------|
| Dolasetron vs Tropisetron+Steroid           | NA | 0.27 (0.12-0.61)         | NA                            |
| Dolasetron vs Ramosetron                    | NA | 0.67 (0.38-1.17)         | NA                            |
| Dolasetron vs Ramosetron+Steroid            | NA | 0.33 (0.17-0.63)         | NA                            |
| Dolasetron vs Placebo                       | NA | 161.31 (8.95-2,907.94)   | NA                            |
| Dolasetron+Steroid vs Palonosetron          | NA | 3.65 (1.68-7.94)         | NA                            |
| Dolasetron+Steroid vs Palonosetron+Steroid  | NA | 2.39 (1.06-5.39)         | NA                            |
| Dolasetron+Steroid vs Tropisetron           | NA | 5.49 (2.27-13.27)        | NA                            |
| Dolasetron+Steroid vs Tropisetron+Steroid   | NA | 1.29 (0.44-3.81)         | NA                            |
| Dolasetron+Steroid vs Ramosetron            | NA | 3.19 (1.29-7.85)         | NA                            |
| Dolasetron+Steroid vs Ramosetron+Steroid    | NA | 1.57 (0.60-4.10)         | NA                            |
| Dolasetron+Steroid vs Placebo               | NA | 771.35 (39.35-15,120.97) | NA                            |
| Palonosetron vs Palonosetron+Steroid        | NA | 0.65 (0.41-1.04)         | NA                            |
| Palonosetron vs Tropisetron                 | NA | 1.51 (0.84-2.68)         | NA                            |
| Palonosetron vs Tropisetron+Steroid         | NA | 0.35 (0.15-0.83)         | NA                            |
| Palonosetron vs Ramosetron                  | NA | 0.87 (0.48-1.60)         | NA                            |
| Palonosetron vs Ramosetron+Steroid          | NA | 0.43 (0.22-0.86)         | NA                            |
| Palonosetron vs Placebo                     | NA | 211.46 (11.64-3,841.31)  | NA                            |
| Palonosetron+Steroid vs Tropisetron         | NA | 2.30 (1.35-3.91)         | NA                            |
| Palonosetron+Steroid vs Tropisetron+Steroid | NA | 0.54 (0.24-1.23)         | NA                            |
| Palonosetron+Steroid vs Ramosetron          | NA | 1.33 (0.77-2.32)         | NA                            |
| Palonosetron+Steroid vs Ramosetron+Steroid  | NA | 0.66 (0.35-1.24)         | NA                            |
| Palonosetron+Steroid vs Placebo             | NA | 323.08 (17.93-5,821.31)  | NA                            |
| Tropisetron vs Tropisetron+Steroid          | 2  | 0.24 (0.13-0.44)         | 0.24 (0.13-0.44) <sup>l</sup> |
| Tropisetron vs Ramosetron                   | NA | 0.58 (0.30-1.13)         | NA                            |
| Tropisetron vs Ramosetron+Steroid           | NA | 0.29 (0.14-0.60)         | NA                            |
| Tropisetron vs Placebo                      | NA | 140.45 (7.63-2,585.40)   | NA                            |
| Tropisetron+Steroid vs Ramosetron           | NA | 2.47 (0.99-6.14)         | NA                            |
| Tropisetron+Steroid vs Ramosetron+Steroid   | NA | 1.22 (0.46-3.20)         | NA                            |
| Tropisetron+Steroid vs Placebo              | NA | 597.18 (30.37-11,744.01) | NA                            |
| Ramosetron vs Ramosetron+Steroid            | 1  | 0.49 (0.31-0.78)         | 0.48 (0.29-0.79)              |
| Ramosetron vs Placebo                       | NA | 242.02 (13.10-4,471.01)  | NA                            |
| Ramosetron+Steroid vs Placebo               | NA | 490.92 (26.08-9,241.08)  | NA                            |

*Between-study variance estimated in NMA model*

0.00

*Design-by-treatment interaction model for inconsistency ( $\chi^2$ , d.f., P-value, Between-study variance)*

(15.91, 12, 0.1955, 0.00)

**No. of patients without vomiting: 71 RCTs and 16,300 adults**

|                                             |    |                     |                               |
|---------------------------------------------|----|---------------------|-------------------------------|
| Ondansetron+Steroid vs Granisetron+Steroid  | 6  | 1.05 (0.78-1.41)    | 1.11 (0.94-1.30) <sup>l</sup> |
| Ondansetron+Steroid vs Ondansetron          | 10 | 2.62 (1.93-3.56)    | 2.65 (1.66-4.23) <sup>k</sup> |
| Ondansetron+Steroid vs Granisetron          | 1  | 2.35 (1.71-3.23)    | 21.00 (3.35-131.51)           |
| Ondansetron+Steroid vs Dolasetron           | NA | 2.90 (1.82-4.60)    | NA                            |
| Ondansetron+Steroid vs Dolasetron+Steroid   | 1  | 1.13 (0.61-2.12)    | 1.49 (1.10-2.03)              |
| Ondansetron+Steroid vs Palonosetron         | NA | 1.39 (0.87-2.23)    | NA                            |
| Ondansetron+Steroid vs Palonosetron+Steroid | 3  | 0.77 (0.49-1.21)    | 0.69 (0.51-0.94) <sup>l</sup> |
| Ondansetron+Steroid vs Tropisetron          | 1  | 3.35 (2.05-5.47)    | 7.20 (2.03-25.51)             |
| Ondansetron+Steroid vs Tropisetron+Steroid  | NA | 0.90 (0.33-2.44)    | NA                            |
| Ondansetron+Steroid vs Ramosetron           | NA | 1.89 (1.02-3.52)    | NA                            |
| Ondansetron+Steroid vs Ramosetron+Steroid   | NA | 0.94 (0.41-2.15)    | NA                            |
| Ondansetron+Steroid vs Placebo              | NA | 36.93 (14.95-91.23) | NA                            |
| Granisetron+Steroid vs Ondansetron          | 1  | 2.50 (1.80-3.46)    | 16.66 (0.92-302.02)           |
| Granisetron+Steroid vs Granisetron          | 9  | 2.25 (1.68-3.00)    | 2.49 (1.32-4.69) <sup>m</sup> |
| Granisetron+Steroid vs Dolasetron           | NA | 2.77 (1.72-4.44)    | NA                            |

|                                             |    |                      |                                  |
|---------------------------------------------|----|----------------------|----------------------------------|
| Granisetron+Steroid vs Dolasetron+Steroid   | NA | 1.08 (0.55-2.12)     | NA                               |
| Granisetron+Steroid vs Palonosetron         | NA | 1.33 (0.83-2.13)     | NA                               |
| Granisetron+Steroid vs Palonosetron+Steroid | 1  | 0.74 (0.46-1.18)     | 0.94 (0.71-1.24)                 |
| Granisetron+Steroid vs Tropisetron          | 1  | 3.20 (1.95-5.24)     | 34.52 (1.83-650.54)              |
| Granisetron+Steroid vs Tropisetron+Steroid  | NA | 0.86 (0.31-2.34)     | NA                               |
| Granisetron+Steroid vs Ramosetron           | NA | 1.81 (0.98-3.32)     | NA                               |
| Granisetron+Steroid vs Ramosetron+Steroid   | 1  | 0.90 (0.40-2.01)     | 0.79 (0.28-2.21)                 |
| Granisetron+Steroid vs Placebo              | NA | 35.27 (14.31-86.95)  | NA                               |
| Ondansetron vs Granisetron                  | 17 | 0.90 (0.72-1.12)     | 0.91 (0.70-1.17) <sup>h</sup>    |
| Ondansetron vs Dolasetron                   | 3  | 1.11 (0.76-1.62)     | 1.19 (0.79-1.79) <sup>o</sup>    |
| Ondansetron vs Dolasetron+Steroid           | NA | 0.43 (0.22-0.85)     | NA                               |
| Ondansetron vs Palonosetron                 | 3  | 0.53 (0.36-0.79)     | 0.40 (0.25-0.63) <sup>p</sup>    |
| Ondansetron vs Palonosetron+Steroid         | NA | 0.29 (0.17-0.50)     | NA                               |
| Ondansetron vs Tropisetron                  | 6  | 1.28 (0.84-1.94)     | 1.02 (0.62-1.69) <sup>q</sup>    |
| Ondansetron vs Tropisetron+Steroid          | NA | 0.34 (0.13-0.90)     | NA                               |
| Ondansetron vs Ramosetron                   | 1  | 0.72 (0.41-1.27)     | 0.89 (0.45-1.74)                 |
| Ondansetron vs Ramosetron+Steroid           | NA | 0.36 (0.16-0.80)     | NA                               |
| Ondansetron vs Placebo                      | 3  | 14.12 (5.97-33.40)   | 11.02 (3.30-36.84) <sup>f</sup>  |
| Granisetron vs Dolasetron                   | 1  | 1.23 (0.82-1.84)     | 0.79 (0.50-1.23)                 |
| Granisetron vs Dolasetron+Steroid           | NA | 0.48 (0.25-0.94)     | NA                               |
| Granisetron vs Palonosetron                 | 3  | 0.59 (0.40-0.87)     | 0.69 (0.48-0.98) <sup>s</sup>    |
| Granisetron vs Palonosetron+Steroid         | NA | 0.33 (0.20-0.55)     | NA                               |
| Granisetron vs Tropisetron                  | 6  | 1.42 (0.93-2.18)     | 1.55 (0.97-2.49) <sup>t</sup>    |
| Granisetron vs Tropisetron+Steroid          | NA | 0.38 (0.14-1.01)     | NA                               |
| Granisetron vs Ramosetron                   | 2  | 0.80 (0.46-1.41)     | 0.61 (0.35-1.07) <sup>u</sup>    |
| Granisetron vs Ramosetron+Steroid           | NA | 0.40 (0.18-0.89)     | NA                               |
| Granisetron vs Placebo                      | 2  | 15.70 (6.61-37.28)   | 33.60 (8.33-135.52) <sup>v</sup> |
| Dolasetron vs Dolasetron+Steroid            | 1  | 0.39 (0.19-0.79)     | 0.21 (0.09-0.50)                 |
| Dolasetron vs Palonosetron                  | 1  | 0.48 (0.30-0.77)     | 0.55 (0.36-0.85)                 |
| Dolasetron vs Palonosetron+Steroid          | NA | 0.27 (0.14-0.50)     | NA                               |
| Dolasetron vs Tropisetron                   | NA | 1.16 (0.66-2.01)     | NA                               |
| Dolasetron vs Tropisetron+Steroid           | NA | 0.31 (0.11-0.87)     | NA                               |
| Dolasetron vs Ramosetron                    | NA | 0.65 (0.33-1.27)     | NA                               |
| Dolasetron vs Ramosetron+Steroid            | NA | 0.32 (0.13-0.78)     | NA                               |
| Dolasetron vs Placebo                       | NA | 12.75 (5.01-32.43)   | NA                               |
| Dolasetron+Steroid vs Palonosetron          | NA | 1.23 (0.58-2.58)     | NA                               |
| Dolasetron+Steroid vs Palonosetron+Steroid  | NA | 0.68 (0.32-1.46)     | NA                               |
| Dolasetron+Steroid vs Tropisetron           | NA | 2.95 (1.37-6.37)     | NA                               |
| Dolasetron+Steroid vs Tropisetron+Steroid   | NA | 0.79 (0.25-2.53)     | NA                               |
| Dolasetron+Steroid vs Ramosetron            | NA | 1.67 (0.71-3.94)     | NA                               |
| Dolasetron+Steroid vs Ramosetron+Steroid    | NA | 0.83 (0.30-2.30)     | NA                               |
| Dolasetron+Steroid vs Placebo               | NA | 32.55 (11.02-96.12)  | NA                               |
| Palonosetron vs Palonosetron+Steroid        | NA | 0.55 (0.30-1.04)     | NA                               |
| Palonosetron vs Tropisetron                 | NA | 2.40 (1.38-4.18)     | NA                               |
| Palonosetron vs Tropisetron+Steroid         | NA | 0.65 (0.23-1.81)     | NA                               |
| Palonosetron vs Ramosetron                  | NA | 1.36 (0.70-2.66)     | NA                               |
| Palonosetron vs Ramosetron+Steroid          | NA | 0.67 (0.28-1.63)     | NA                               |
| Palonosetron vs Placebo                     | NA | 26.53 (10.41-67.63)  | NA                               |
| Palonosetron+Steroid vs Tropisetron         | NA | 4.34 (2.28-8.26)     | NA                               |
| Palonosetron+Steroid vs Tropisetron+Steroid | NA | 1.16 (0.39-3.44)     | NA                               |
| Palonosetron+Steroid vs Ramosetron          | NA | 2.45 (1.16-5.16)     | NA                               |
| Palonosetron+Steroid vs Ramosetron+Steroid  | NA | 1.22 (0.48-3.05)     | NA                               |
| Palonosetron+Steroid vs Placebo             | NA | 47.86 (17.68-129.55) | NA                               |



|                                           |    |                      |                               |
|-------------------------------------------|----|----------------------|-------------------------------|
| Tropisetron vs Tropisetron+Steroid        | 2  | 0.27 (0.11-0.64)     | 0.27 (0.13-0.57) <sup>w</sup> |
| Tropisetron vs Ramosetron                 | NA | 0.57 (0.28-1.12)     | NA                            |
| Tropisetron vs Ramosetron+Steroid         | NA | 0.28 (0.11-0.69)     | NA                            |
| Tropisetron vs Placebo                    | NA | 11.03 (4.28-28.47)   | NA                            |
| Tropisetron+Steroid vs Ramosetron         | NA | 2.11 (0.69-6.40)     | NA                            |
| Tropisetron+Steroid vs Ramosetron+Steroid | NA | 1.04 (0.30-3.64)     | NA                            |
| Tropisetron+Steroid vs Placebo            | NA | 41.11 (11.34-149.11) | NA                            |
| Ramosetron vs Ramosetron+Steroid          | 1  | 0.50 (0.24-1.02)     | 0.53 (0.31-0.89)              |
| Ramosetron vs Placebo                     | 1  | 19.52 (7.62-50.03)   | 10.45 (2.21-49.38)            |
| Ramosetron+Steroid vs Placebo             | NA | 39.39 (12.80-121.23) | NA                            |

*Between-study variance estimated in NMA model*

0.11

*Design-by-treatment interaction model for inconsistency ( $\chi^2$ , d.f., P-value, Between-study variance)*

(23.93, 17, 0.1214, 0.10)

**No. of patients without CINV: 27 RCTs and 10,924 adults**

|                                             |    |                         |                                |
|---------------------------------------------|----|-------------------------|--------------------------------|
| Ondansetron+Steroid vs Granisetron+Steroid  | 6  | 0.97 (0.86-1.09)        | 1.01 (0.88-1.14) <sup>x</sup>  |
| Ondansetron+Steroid vs Ondansetron          | 1  | 2.16 (1.62-2.87)        | 1.96 (1.12-3.42)               |
| Ondansetron+Steroid vs Granisetron          | NA | 2.17 (1.73-2.72)        | NA                             |
| Ondansetron+Steroid vs Palonosetron         | NA | 2.21 (0.50-9.72)        | NA                             |
| Ondansetron+Steroid vs Palonosetron+Steroid | 2  | 0.81 (0.67-0.98)        | 0.63 (0.35-1.12) <sup>y</sup>  |
| Ondansetron+Steroid vs Tropisetron          | NA | 4.18 (1.99-8.77)        | NA                             |
| Ondansetron+Steroid vs Ramosetron           | NA | 1.44 (0.82-2.55)        | NA                             |
| Ondansetron+Steroid vs Ramosetron+Steroid   | 1  | 0.67 (0.34-1.31)        | 0.20 (0.06-0.72)               |
| Ondansetron+Steroid vs Placebo              | NA | 365.96 (20.44-6,553.02) | NA                             |
| Granisetron+Steroid vs Ondansetron          | NA | 2.23 (1.69-2.93)        | NA                             |
| Granisetron+Steroid vs Granisetron          | 6  | 2.24 (1.83-2.74)        | 2.35 (1.88-2.94) <sup>z</sup>  |
| Granisetron+Steroid vs Palonosetron         | NA | 2.28 (0.52-10.02)       | NA                             |
| Granisetron+Steroid vs Palonosetron+Steroid | 3  | 0.84 (0.70-0.99)        | 0.78 (0.54-1.12) <sup>a2</sup> |
| Granisetron+Steroid vs Tropisetron          | NA | 4.31 (2.07-9.01)        | NA                             |
| Granisetron+Steroid vs Ramosetron           | NA | 1.49 (0.85-2.62)        | NA                             |
| Granisetron+Steroid vs Ramosetron+Steroid   | NA | 0.69 (0.35-1.35)        | NA                             |
| Granisetron+Steroid vs Placebo              | NA | 378.03 (21.15-6,756.45) | NA                             |
| Ondansetron vs Granisetron                  | 6  | 1.00 (0.81-1.25)        | 0.95 (0.75-1.20) <sup>b2</sup> |
| Ondansetron vs Palonosetron                 | 1  | 1.02 (0.24-4.38)        | 1.03 (0.24-4.38)               |
| Ondansetron vs Palonosetron+Steroid         | NA | 0.38 (0.27-0.52)        | NA                             |
| Ondansetron vs Tropisetron                  | 2  | 1.94 (0.95-3.95)        | 2.15 (0.93-4.96) <sup>c2</sup> |
| Ondansetron vs Ramosetron                   | 1  | 0.67 (0.40-1.12)        | 0.84 (0.48-1.47)               |
| Ondansetron vs Ramosetron+Steroid           | NA | 0.31 (0.16-0.59)        | NA                             |
| Ondansetron vs Placebo                      | NA | 169.61 (9.48-3,035.34)  | NA                             |
| Granisetron vs Palonosetron                 | NA | 1.02 (0.23-4.43)        | NA                             |
| Granisetron vs Palonosetron+Steroid         | NA | 0.37 (0.29-0.49)        | NA                             |
| Granisetron vs Tropisetron                  | 2  | 1.93 (0.94-3.93)        | 1.77 (0.77-4.08) <sup>d2</sup> |
| Granisetron vs Ramosetron                   | NA | 0.67 (0.39-1.15)        | NA                             |
| Granisetron vs Ramosetron+Steroid           | NA | 0.31 (0.16-0.60)        | NA                             |
| Granisetron vs Placebo                      | 1  | 168.85 (9.51-2,996.64)  | 169.00 (9.52-2,999.80)         |
| Palonosetron vs Palonosetron+Steroid        | NA | 0.37 (0.08-1.62)        | NA                             |
| Palonosetron vs Tropisetron                 | NA | 1.89 (0.37-9.52)        | NA                             |
| Palonosetron vs Ramosetron                  | NA | 0.65 (0.14-3.05)        | NA                             |
| Palonosetron vs Ramosetron+Steroid          | NA | 0.30 (0.06-1.48)        | NA                             |
| Palonosetron vs Placebo                     | NA | 165.47 (6.55-4,182.08)  | NA                             |
| Palonosetron+Steroid vs Tropisetron         | NA | 5.16 (2.43-10.97)       | NA                             |

|                                            |    |                          |                  |
|--------------------------------------------|----|--------------------------|------------------|
| Palonosetron+Steroid vs Ramosetron         | NA | 1.79 (0.99-3.21)         | NA               |
| Palonosetron+Steroid vs Ramosetron+Steroid | NA | 0.83 (0.42-1.64)         | NA               |
| Palonosetron+Steroid vs Placebo            | NA | 452.19 (25.18-8,121.41)  | NA               |
| Tropisetron vs Ramosetron                  | NA | 0.35 (0.14-0.83)         | NA               |
| Tropisetron vs Ramosetron+Steroid          | NA | 0.16 (0.06-0.42)         | NA               |
| Tropisetron vs Placebo                     | NA | 87.64 (4.53-1,696.76)    | NA               |
| Ramosetron vs Ramosetron+Steroid           | 1  | 0.46 (0.29-0.73)         | 0.55 (0.34-0.89) |
| Ramosetron vs Placebo                      | NA | 253.30 (13.55-4,734.53)  | NA               |
| Ramosetron+Steroid vs Placebo              | NA | 546.71 (28.58-10,456.90) | NA               |

**Between-study variance estimated in NMA model** 0.00

**Design-by-treatment interaction model for inconsistency ( $\chi^2$ , d.f., P-value, Between-study variance)** (11.95, 6, 0.0631, 0.00)

**No. of patients experiencing severe vomiting: 11 RCTs and 1,364 adults**

|                                           |    |                  |                                |
|-------------------------------------------|----|------------------|--------------------------------|
| Ondansetron+Steroid vs Ondansetron        | 1  | 0.58 (0.07-4.56) | 0.58 (0.07-4.56)               |
| Ondansetron+Steroid vs Granisetron        | NA | 0.38 (0.05-3.06) | NA                             |
| Ondansetron+Steroid vs Ramosetron         | NA | 0.52 (0.06-4.68) | NA                             |
| Ondansetron+Steroid vs Placebo            | NA | 0.09 (0.01-1.17) | NA                             |
| Ondansetron vs Granisetron                | 4  | 0.65 (0.45-0.94) | 0.63 (0.43-0.93) <sup>e2</sup> |
| Ondansetron vs Ramosetron                 | 1  | 0.89 (0.41-1.94) | NA                             |
| Ondansetron vs Placebo                    | 3  | 0.16 (0.04-0.70) | 0.16 (0.04-0.70) <sup>l2</sup> |
| Granisetron vs Ramosetron                 | 1  | 1.37 (0.64-2.92) | 1.17 (0.46-2.96)               |
| Granisetron vs Placebo                    | NA | 0.25 (0.05-1.13) | NA                             |
| Ramosetron vs Placebo                     | NA | 0.18 (0.03-0.95) | NA                             |
| Ramosetron+Steroid vs Granisetron+Steroid | 1  | NA               | 0.97 (0.06-16.16)              |

**Between-study variance estimated in NMA model** NA

**Design-by-treatment interaction model for inconsistency ( $\chi^2$ , d.f., P-value, Between-study variance)** (0.33, 1, 0.5628, 0.00)

**Abbreviations:** CI - confidence interval; CINV - chemotherapy-induced nausea and vomiting; MA - meta-analysis; NA - not applicable; NMA - network meta-analysis; OR - odds ratio; RCT - randomized controlled trial

\* **Between-study variance values have been indicated by a letter:** a= 0.00, b= 0.11, c= 0.01, d < 0.0001, e= 0.00, f= 0.51, g= 0.22, h= 1.01, i = 0.00, j =0.00, k= 0.28, l= 0.00, m= 0.67, n= 0.12, o= 0.04, p= 0.00, q= 0.15, r=0.00, s=0.00, t=<0.0001, u= 0.00, v= 0.00, w= 0.00, x= 0.00, y= 0.13, z= 0.01, a2 = 0.07, b2, = 0.00, c2= 0.00, d2= 0.00, e2= 0.00, f2= 0.00.

## Appendix L. No. of patients without nausea – RCTs and adults only

Reference treatment: PLAC

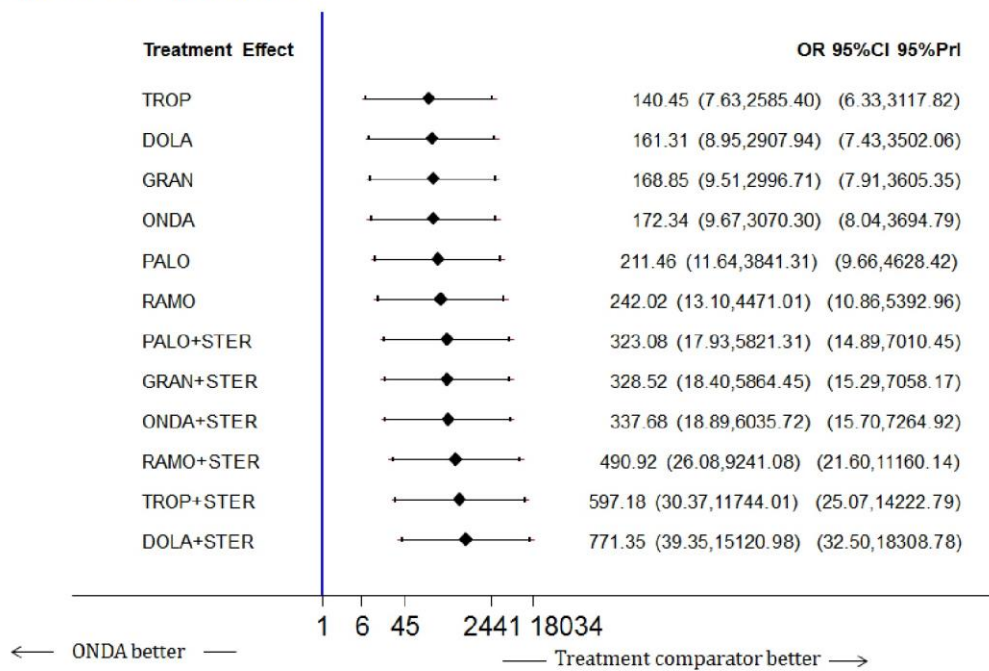

**Abbreviations:** CI - confidence interval; OR - odds ratio; PrI - prediction interval; RCT - randomized controlled trial

DOLA - dolasetron; GRAN - granisetron; ONDA - ondansetron; PLAC - placebo; PALO - palonosetron; RAMO - ramosetron; STER - steroid; TROP - tropisetron

**Appendix M. No. of patients without nausea – RCTs and adults only – SUCRA values for each treatment**

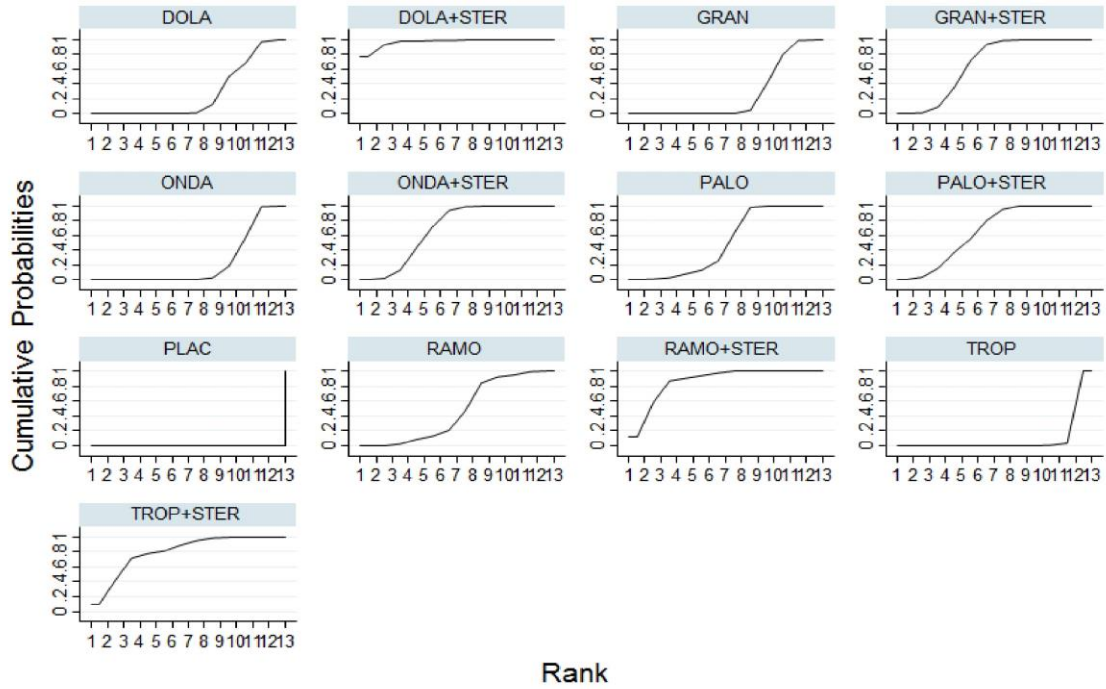

**Abbreviation:** RCT - randomized controlled trial; SUCRA - surface under the cumulative ranking curve

DOLA - dolasetron; DOLA+STER - dolasetron+steroid; GRAN - granisetron; GRAN+STER - granisetron+steroid; ONDA - ondansetron; ONDA+STER - ondansetron+steroid; PLAC - placebo; PALO - palonosetron; PALO+STER - palonosetron+steroid; RAMO - ramosetron; RAMO+STER - ramosetron+steroid; TROP - tropisetron; TROP+STER - tropisetron+steroid

## Appendix N. No. of patients without nausea sub-group analysis for Network meta-analysis

| <b>NO. OF PATIENTS WITHOUT NAUSEA</b>       | <b>ALL STUDY DESIGNS</b> | <b>ALL RCTs</b>         | <b>LOW ROB RANDOMIZATION</b> | <b>CDDP YES (RCTs SGA)</b> | <b>CDDP NO (RCTs SGA)</b> |
|---------------------------------------------|--------------------------|-------------------------|------------------------------|----------------------------|---------------------------|
| <b>Treatment Comparison</b>                 | <b>OR (95% CI)</b>       | <b>OR (95% CI)</b>      | <b>OR (95% CI)</b>           | <b>OR (95% CI)</b>         | <b>OR (95% CI)</b>        |
| Ondansetron+Steroid vs Granisetron+Steroid  | 0.92 (0.74-1.14)         | 1.01 (0.87-1.17)        | 1.00 (0.79-1.27)             | 1.10 (0.93-1.31)           | 0.92 (0.72-1.18)          |
| Ondansetron+Steroid vs Ondansetron          | 2.07 (1.59-2.70)         | 2.02 (1.62-2.52)        | 1.99 (1.42-2.80)             | 1.94 (1.50-2.51)           | 2.62 (1.39-4.94)          |
| Ondansetron+Steroid vs Granisetron          | 1.93 (1.49-2.51)         | 1.94 (1.56-2.40)        | 2.33 (1.63-3.32)             | 1.92 (1.50-2.46)           | 2.53 (1.45-4.42)          |
| Ondansetron+Steroid vs Dolasetron           | 2.14 (1.39-3.32)         | 1.92 (1.34-2.77)        | 2.48 (1.14-5.42)             | 1.87 (1.19-2.94)           | 3.24 (1.33-7.89)          |
| Ondansetron+Steroid vs Dolasetron+Steroid   | 0.71 (0.30-1.66)         | 0.40 (0.18-0.90)        | NA                           | 0.39 (0.17-0.90)           | 2.00 (0.91-4.44)          |
| Ondansetron+Steroid vs Palonosetron         | 1.32 (0.82-2.12)         | 1.29 (0.86-1.92)        | 1.84 (0.95-3.60)             | 1.99 (0.62-6.43)           | 0.92 (0.55-1.54)          |
| Ondansetron+Steroid vs Palonosetron+Steroid | 0.94 (0.63-1.40)         | 1.02 (0.77-1.36)        | 1.05 (0.78-1.43)             | NA                         | NA                        |
| Ondansetron+Steroid vs Tropisetron          | 3.16 (2.02-4.96)         | 3.19 (2.02-5.06)        | 1.71 (0.90-3.23)             | NA                         | NA                        |
| Ondansetron+Steroid vs Tropisetron+Steroid  | 0.79 (0.44-1.40)         | 0.75 (0.34-1.64)        | NA                           | NA                         | NA                        |
| Ondansetron+Steroid vs Ramosetron           | 1.66 (0.95-2.92)         | 1.36 (0.80-2.32)        | 1.39 (0.71-2.73)             | 1.25 (0.72-2.16)           | 8.51 (2.11-34.27)         |
| Ondansetron+Steroid vs Ramosetron+Steroid   | 0.76 (0.38-1.52)         | 0.67 (0.36-1.25)        | 0.67 (0.29-1.55)             | 0.64 (0.34-1.19)           | 2.36 (0.49-11.46)         |
| Ondansetron+Steroid vs Placebo              | 326.60 (17.69-6,030.97)  | 327.24 (18.22-5,877.76) | NA                           | 323.73 (18.05-5,807.37)    | 4.49 (0.83-24.37)         |
| Granisetron+Steroid vs Ondansetron          | 2.25 (1.70-2.99)         | 2.00 (1.60-2.51)        | 1.99 (1.39-2.85)             | 1.76 (1.36-2.28)           | 2.85 (1.59-5.11)          |
| Granisetron+Steroid vs Granisetron          | 2.10 (1.65-2.68)         | 1.92 (1.58-2.34)        | 2.33 (1.66-3.26)             | 1.74 (1.40-2.17)           | 2.75 (1.66-4.54)          |
| Granisetron+Steroid vs Dolasetron           | 2.33 (1.50-3.63)         | 1.91 (1.33-2.73)        | 2.48 (1.15-5.37)             | 1.70 (1.09-2.64)           | 3.52 (1.49-8.28)          |
| Granisetron+Steroid vs Dolasetron+Steroid   | 0.77 (0.33-1.82)         | 0.40 (0.18-0.89)        | NA                           | 0.36 (0.15-0.81)           | 2.18 (1.02-4.64)          |
| Granisetron+Steroid vs Palonosetron         | 1.43 (0.90-2.30)         | 1.28 (0.86-1.89)        | 1.84 (0.96-3.56)             | 1.81 (0.56-5.83)           | 1.00 (0.56-1.77)          |
| Granisetron+Steroid vs Palonosetron+Steroid | 1.02 (0.70-1.49)         | 1.02 (0.79-1.31)        | 1.05 (0.84-1.32)             | NA                         | NA                        |
| Granisetron+Steroid vs Tropisetron          | 3.44 (2.17-5.46)         | 3.17 (1.99-5.04)        | 1.71 (0.90-3.26)             | NA                         | NA                        |
| Granisetron+Steroid vs Tropisetron+Steroid  | 0.85 (0.48-1.53)         | 0.74 (0.34-1.63)        | NA                           | NA                         | NA                        |
| Granisetron+Steroid vs Ramosetron           | 1.81 (1.03-3.17)         | 1.35 (0.80-2.28)        | 1.39 (0.72-2.70)             | 1.13 (0.67-1.93)           | 9.24 (2.34-36.42)         |
| Granisetron+Steroid vs Ramosetron+Steroid   | 0.83 (0.42-1.63)         | 0.67 (0.36-1.23)        | 0.67 (0.29-1.53)             | 0.58 (0.32-1.07)           | 2.56 (0.54-12.21)         |
| Granisetron+Steroid vs Placebo              | 354.94 (19.25-6,544.13)  | 324.91 (18.11-5,828.26) | NA                           | 293.72 (16.41-5,256.75)    | 4.88 (0.92-26.00)         |
| Ondansetron vs Granisetron                  | 0.93 (0.77-1.13)         | 0.96 (0.82-1.12)        | 1.17 (0.88-1.55)             | 0.99 (0.80-1.21)           | 0.96 (0.72-1.30)          |
| Ondansetron vs Dolasetron                   | 1.03 (0.71-1.50)         | 0.95 (0.70-1.30)        | 1.24 (0.59-2.64)             | 0.96 (0.63-1.46)           | 1.23 (0.66-2.31)          |
| Ondansetron vs Dolasetron+Steroid           | 0.34 (0.15-0.78)         | 0.20 (0.09-0.44)        | NA                           | 0.20 (0.09-0.46)           | 0.76 (0.40-1.45)          |
| Ondansetron vs Palonosetron                 | 0.64 (0.42-0.97)         | 0.64 (0.44-0.92)        | 0.93 (0.49-1.74)             | 1.03 (0.33-3.22)           | 0.35 (0.15-0.79)          |
| Ondansetron vs Palonosetron+Steroid         | 0.45 (0.29-0.71)         | 0.51 (0.36-0.72)        | 0.53 (0.35-0.80)             | NA                         | NA                        |
| Ondansetron vs Tropisetron                  | 1.53 (1.02-2.28)         | 1.58 (1.05-2.38)        | 0.86 (0.50-1.47)             | NA                         | NA                        |

|                                             |                         |                          |                  |                          |                   |
|---------------------------------------------|-------------------------|--------------------------|------------------|--------------------------|-------------------|
| Ondansetron vs Tropisetron+Steroid          | 0.38 (0.21-0.68)        | 0.37 (0.17-0.79)         | NA               | NA                       | NA                |
| Ondansetron vs Ramosetron                   | 0.80 (0.47-1.37)        | 0.68 (0.40-1.13)         | 0.70 (0.37-1.32) | 0.64 (0.37-1.11)         | 3.24 (0.91-11.60) |
| Ondansetron vs Ramosetron+Steroid           | 0.37 (0.19-0.73)        | 0.33 (0.18-0.62)         | 0.34 (0.15-0.76) | 0.33 (0.18-0.62)         | 0.90 (0.21-3.94)  |
| Ondansetron vs Placebo                      | 157.53 (8.58-2,893.49)  | 162.14 (9.06-2,901.65)   | NA               | 166.69 (9.32-2,980.39)   | 1.71 (0.34-8.68)  |
| Granisetron vs Dolasetron                   | 1.11 (0.76-1.62)        | 0.99 (0.73-1.35)         | 1.07 (0.53-2.14) | 0.98 (0.66-1.44)         | 1.28 (0.64-2.56)  |
| Granisetron vs Dolasetron+Steroid           | 0.37 (0.16-0.84)        | 0.21 (0.09-0.45)         | NA               | 0.20 (0.09-0.46)         | 0.79 (0.45-1.40)  |
| Granisetron vs Palonosetron                 | 0.68 (0.45-1.04)        | 0.66 (0.47-0.95)         | 0.79 (0.45-1.40) | 1.04 (0.33-3.32)         | 0.36 (0.17-0.78)  |
| Granisetron vs Palonosetron+Steroid         | 0.48 (0.31-0.75)        | 0.53 (0.38-0.73)         | 0.45 (0.30-0.67) | NA                       | NA                |
| Granisetron vs Tropisetron                  | 1.64 (1.08-2.48)        | 1.65 (1.08-2.52)         | 0.73 (0.40-1.35) | NA                       | NA                |
| Granisetron vs Tropisetron+Steroid          | 0.41 (0.23-0.72)        | 0.39 (0.18-0.83)         | NA               | NA                       | NA                |
| Granisetron vs Ramosetron                   | 0.86 (0.51-1.44)        | 0.70 (0.43-1.16)         | 0.60 (0.34-1.06) | 0.65 (0.39-1.08)         | 3.37 (0.94-12.06) |
| Granisetron vs Ramosetron+Steroid           | 0.39 (0.20-0.77)        | 0.35 (0.19-0.63)         | 0.29 (0.14-0.61) | 0.33 (0.18-0.61)         | 0.93 (0.21-4.09)  |
| Granisetron vs Placebo                      | 168.87 (9.25-3,081.80)  | 168.85 (9.48-3,008.88)   | NA               | 168.85 (9.51-2,996.74)   | 1.78 (0.36-8.76)  |
| Dolasetron vs Dolasetron+Steroid            | 0.33 (0.16-0.70)        | 0.21 (0.10-0.43)         | NA               | 0.21 (0.10-0.42)         | 0.62 (0.25-1.51)  |
| Dolasetron vs Palonosetron                  | 0.62 (0.40-0.95)        | 0.67 (0.47-0.95)         | 0.74 (0.50-1.12) | 1.07 (0.32-3.59)         | 0.28 (0.10-0.79)  |
| Dolasetron vs Palonosetron+Steroid          | 0.44 (0.25-0.78)        | 0.53 (0.34-0.83)         | 0.43 (0.19-0.95) | NA                       | NA                |
| Dolasetron vs Tropisetron                   | 1.47 (0.87-2.50)        | 1.66 (1.00-2.76)         | 0.69 (0.27-1.74) | NA                       | NA                |
| Dolasetron vs Tropisetron+Steroid           | 0.37 (0.19-0.72)        | 0.39 (0.17-0.88)         | NA               | NA                       | NA                |
| Dolasetron vs Ramosetron                    | 0.78 (0.42-1.45)        | 0.71 (0.40-1.27)         | 0.56 (0.23-1.38) | 0.67 (0.35-1.26)         | 2.63 (0.63-10.87) |
| Dolasetron vs Ramosetron+Steroid            | 0.36 (0.17-0.76)        | 0.35 (0.18-0.69)         | 0.27 (0.10-0.76) | 0.34 (0.17-0.70)         | 0.73 (0.15-3.62)  |
| Dolasetron vs Placebo                       | 152.29 (8.14-2,847.65)  | 170.17 (9.39-3,083.15)   | NA               | 173.01 (9.49-3,152.99)   | 1.39 (0.24-7.90)  |
| Dolasetron+Steroid vs Palonosetron          | 1.85 (0.78-4.41)        | 3.20 (1.44-7.09)         | NA               | 5.10 (1.25-20.73)        | 0.46 (0.18-1.18)  |
| Dolasetron+Steroid vs Palonosetron+Steroid  | 1.32 (0.52-3.36)        | 2.55 (1.10-5.92)         | NA               | NA                       | NA                |
| Dolasetron+Steroid vs Tropisetron           | 4.44 (1.83-10.82)       | 7.94 (3.30-19.13)        | NA               | NA                       | NA                |
| Dolasetron+Steroid vs Tropisetron+Steroid   | 1.10 (0.41-2.97)        | 1.86 (0.63-5.50)         | NA               | NA                       | NA                |
| Dolasetron+Steroid vs Ramosetron            | 2.34 (0.90-6.04)        | 3.39 (1.34-8.55)         | NA               | 3.19 (1.24-8.24)         | 4.24 (1.05-17.14) |
| Dolasetron+Steroid vs Ramosetron+Steroid    | 1.07 (0.38-3.05)        | 1.67 (0.63-4.48)         | NA               | 1.64 (0.60-4.45)         | 1.18 (0.24-5.73)  |
| Dolasetron+Steroid vs Placebo               | 458.86 (22.42-9,389.80) | 813.70 (41.14-16,092.52) | NA               | 827.30 (41.76-16,390.19) | 2.24 (0.41-12.18) |
| Palonosetron vs Palonosetron+Steroid        | 0.71 (0.39-1.29)        | 0.80 (0.50-1.27)         | 0.57 (0.29-1.14) | NA                       | NA                |
| Palonosetron vs Tropisetron                 | 2.40 (1.35-4.27)        | 2.48 (1.44-4.30)         | 0.93 (0.40-2.13) | NA                       | NA                |
| Palonosetron vs Tropisetron+Steroid         | 0.60 (0.29-1.20)        | 0.58 (0.25-1.34)         | NA               | NA                       | NA                |
| Palonosetron vs Ramosetron                  | 1.26 (0.65-2.45)        | 1.06 (0.58-1.95)         | 0.76 (0.34-1.69) | 0.63 (0.18-2.21)         | 9.27 (2.10-41.04) |
| Palonosetron vs Ramosetron+Steroid          | 0.58 (0.26-1.27)        | 0.52 (0.26-1.05)         | 0.36 (0.14-0.93) | 0.32 (0.09-1.18)         | 2.57 (0.49-13.58) |
| Palonosetron vs Placebo                     | 247.54 (13.16-4,656.49) | 254.55 (13.98-4,635.90)  | NA               | 162.31 (7.30-3,607.54)   | 4.90 (0.84-28.72) |
| Palonosetron+Steroid vs Tropisetron         | 3.37 (1.87-6.08)        | 3.12 (1.82-5.35)         | 1.62 (0.82-3.19) | NA                       | NA                |
| Palonosetron+Steroid vs Tropisetron+Steroid | 0.84 (0.42-1.66)        | 0.73 (0.32-1.68)         | NA               | NA                       | NA                |
| Palonosetron+Steroid vs Ramosetron          | 1.78 (0.91-3.48)        | 1.33 (0.74-2.39)         | 1.32 (0.66-2.65) | NA                       | NA                |
| Palonosetron+Steroid vs Ramosetron+Steroid  | 0.81 (0.38-1.76)        | 0.66 (0.34-1.28)         | 0.64 (0.27-1.49) | NA                       | NA                |
| Palonosetron+Steroid vs Placebo             | 348.38 (18.46-6,572.91) | 319.48 (17.61-5,796.89)  | NA               | NA                       | NA                |

|                                                                                                                                                                                                                      |                          |                          |                        |                         |                        |
|----------------------------------------------------------------------------------------------------------------------------------------------------------------------------------------------------------------------|--------------------------|--------------------------|------------------------|-------------------------|------------------------|
| Tropisetron vs Tropisetron+Steroid                                                                                                                                                                                   | 0.25 (0.14-0.43)         | 0.23 (0.12-0.44)         | NA                     | NA                      | NA                     |
| Tropisetron vs Ramosetron                                                                                                                                                                                            | 0.53 (0.29-0.95)         | 0.43 (0.22-0.81)         | 0.82 (0.35-1.88)       | NA                      | NA                     |
| Tropisetron vs Ramosetron+Steroid                                                                                                                                                                                    | 0.24 (0.12-0.50)         | 0.21 (0.10-0.44)         | 0.39 (0.15-1.04)       | NA                      | NA                     |
| Tropisetron vs Placebo                                                                                                                                                                                               | 103.25 (5.49-1,940.54)   | 102.44 (5.57-1,883.48)   | NA                     | NA                      | NA                     |
| Tropisetron+Steroid vs Ramosetron                                                                                                                                                                                    | 2.12 (1.01-4.43)         | 1.82 (0.74-4.49)         | NA                     | NA                      | NA                     |
| Tropisetron+Steroid vs Ramosetron+Steroid                                                                                                                                                                            | 0.97 (0.42-2.27)         | 0.90 (0.34-2.36)         | NA                     | NA                      | NA                     |
| Tropisetron+Steroid vs Placebo                                                                                                                                                                                       | 415.69 (21.51-8,031.80)  | 436.73 (22.20-8,592.11)  | NA                     | NA                      | NA                     |
| Ramosetron vs Ramosetron+Steroid                                                                                                                                                                                     | 0.46 (0.26-0.81)         | 0.49 (0.31-0.79)         | 0.48 (0.29-0.79)       | 0.51 (0.32-0.81)        | 0.28 (0.13-0.59)       |
| Ramosetron vs Placebo                                                                                                                                                                                                | 196.25 (10.27-3,749.13)  | 240.06 (12.91-4,463.94)  | NA                     | 259.26 (13.98-4,809.16) | 0.53 (0.07-4.07)       |
| Ramosetron+Steroid vs Placebo                                                                                                                                                                                        | 427.80 (21.74-8,416.98)  | 486.00 (25.62-9,217.62)  | NA                     | 505.93 (26.80-9,550.84) | 1.91 (0.22-16.78)      |
| <b>Between-study variance in NMA</b>                                                                                                                                                                                 | 0.04                     | 0.01                     | 0.00                   | 0.00                    | 0.00                   |
| <b>Design-by-treatment interaction model for inconsistency (<math>\chi^2</math>, d.f., P-value, Between-study variance)</b>                                                                                          | 31.11 (17, 0.0194, 0.02) | 23.17 (13, 0.0396, 0.00) | 0.06 (2, 0.9709, 0.01) | 0.39 (3, 0.9425, 0.00)  | 1.84 (1, 0.1748, 0.00) |
| <b>Abbreviations:</b> CDDP - cisplatin; CI - confidence interval; NA - not applicable; NMA – network meta-analysis; OR - odds ratio; RCT - randomized controlled trial; ROB – risk of bias; SGA – sub-group analysis |                          |                          |                        |                         |                        |

## Appendix O. No. of patients without vomiting – RCTs only

Reference treatment: PLAC

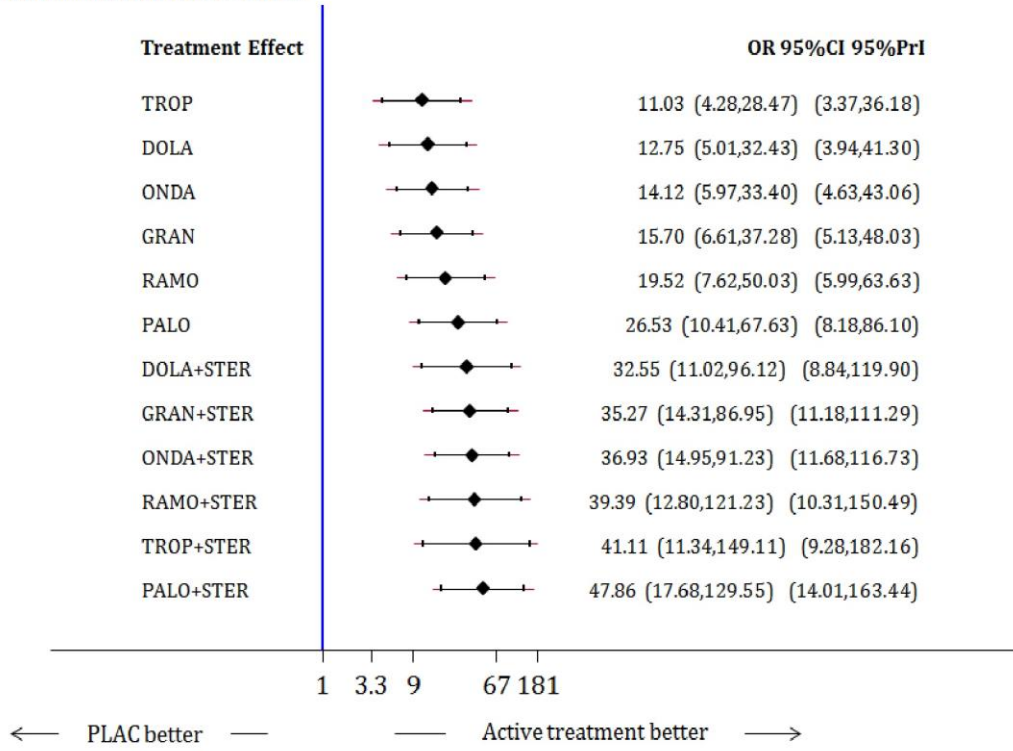

**Abbreviations:** CI - confidence interval; OR - odds ratio; PrI - prediction interval; RCT - randomized controlled trial

DOLA - dolasetron; GRAN - granisetron; ONDA - ondansetron; PALO - palonosetron; PLAC – placebo; RAMO - ramosetron; STER – steroid; TROP - tropisetron



**Appendix P. No. of patients without vomiting – RCTs only – SUCRA values for each treatment**

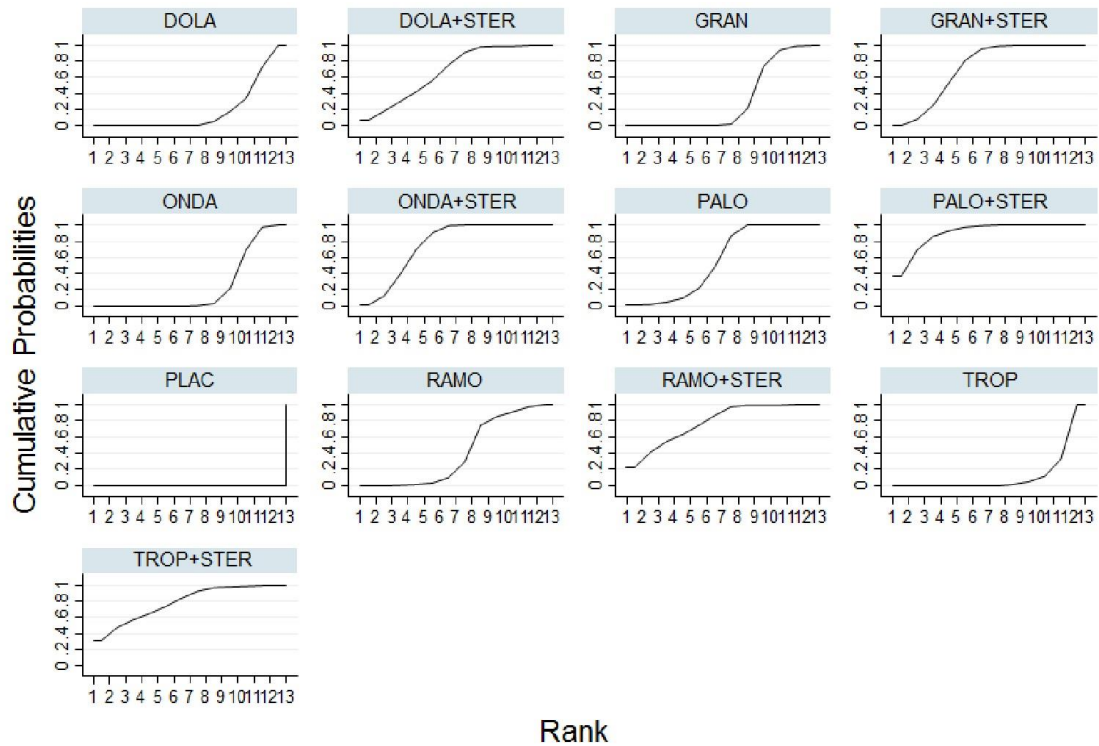

**Abbreviation:** RCT - randomized controlled trial; SUCRA - surface under the cumulative ranking curve

DOLA - dolasetron; DOLA+STER - dolasetron+steroid; GRAN - granisetron; GRAN+STER - granisetron+steroid; ONDA - ondansetron; ONDA+STER - ondansetron+steroid; PLAC - placebo; PALO - palonosetron; PALO+STER - palonosetron+steroid; RAMO - ramosetron; RAMO+STER - ramosetron+steroid; TROP - tropisetron; TROP+STER - tropisetron+steroid

## Appendix Q. No. of patients without vomiting sub-group analysis for Network meta-analysis

| NO. OF PATIENTS WITHOUT VOMITING            | ALL STUDY DESIGNS   | ALL RCTs            | LOW ROB RANDOMIZATION | CDDP YES (RCTs SGA) | CDDP NO (RCTs SGA)    |
|---------------------------------------------|---------------------|---------------------|-----------------------|---------------------|-----------------------|
| Treatment Comparison                        | OR (95% CI)         | OR (95% CI)         | OR (95% CI)           | OR (95% CI)         | OR (95% CI)           |
| Ondansetron+Steroid vs Granisetron+Steroid  | 1.07 (0.81-1.40)    | 1.05 (0.78-1.41)    | 1.09 (0.51-2.31)      | 1.13 (0.74-1.73)    | 1.08 (0.43-2.70)      |
| Ondansetron+Steroid vs Ondansetron          | 2.62 (1.94-3.52)    | 2.62 (1.93-3.56)    | 2.82 (1.46-5.45)      | 2.09 (1.38-3.18)    | 5.74 (1.33-24.85)     |
| Ondansetron+Steroid vs Granisetron          | 2.37 (1.74-3.21)    | 2.35 (1.71-3.23)    | 2.17 (0.98-4.80)      | 1.98 (1.26-3.13)    | 5.07 (1.32-19.46)     |
| Ondansetron+Steroid vs Dolasetron           | 2.94 (1.87-4.65)    | 2.90 (1.82-4.60)    | 2.68 (0.56-12.88)     | 1.97 (1.02-3.82)    | 9.76 (1.56-61.08)     |
| Ondansetron+Steroid vs Dolasetron+Steroid   | 1.33 (0.74-2.41)    | 1.13 (0.61-2.12)    | NA                    | 0.41 (0.11-1.55)    | NA                    |
| Ondansetron+Steroid vs Palonosetron         | 1.40 (0.88-2.23)    | 1.39 (0.87-2.23)    | 1.47 (0.54-4.01)      | 1.28 (0.57-2.85)    | 3.84 (0.71-20.79)     |
| Ondansetron+Steroid vs Palonosetron+Steroid | 0.78 (0.50-1.21)    | 0.77 (0.49-1.21)    | 0.80 (0.38-1.68)      | 0.71 (0.31-1.63)    | 0.61 (0.23-1.60)      |
| Ondansetron+Steroid vs Tropisetron          | 3.27 (2.09-5.11)    | 3.35 (2.05-5.47)    | 4.47 (1.09-18.34)     | 1.96 (0.64-6.02)    | 5.43 (0.99-29.74)     |
| Ondansetron+Steroid vs Tropisetron+Steroid  | 0.77 (0.38-1.55)    | 0.90 (0.33-2.44)    | NA                    | 0.36 (0.06-2.06)    | 1.99 (0.23-17.04)     |
| Ondansetron+Steroid vs Ramosetron           | 1.89 (1.06-3.36)    | 1.89 (1.02-3.52)    | 1.30 (0.29-5.79)      | 1.58 (0.77-3.22)    | 4.80 (0.18-125.95)    |
| Ondansetron+Steroid vs Ramosetron+Steroid   | 0.94 (0.42-2.11)    | 0.94 (0.41-2.15)    | 0.69 (0.10-4.79)      | 0.85 (0.34-2.13)    | NA                    |
| Ondansetron+Steroid vs Placebo              | 36.96 (15.08-90.57) | 36.93 (14.95-91.23) | 16.37 (0.55-486.26)   | 23.94 (7.84-73.11)  | 258.22 (7.44-8957.84) |
| Granisetron+Steroid vs Ondansetron          | 2.46 (1.80-3.36)    | 2.50 (1.80-3.46)    | 2.59 (1.17-5.74)      | 1.86 (1.18-2.91)    | 5.33 (1.70-16.72)     |
| Granisetron+Steroid vs Granisetron          | 2.22 (1.68-2.94)    | 2.25 (1.68-3.00)    | 2.00 (1.01-3.94)      | 1.76 (1.20-2.57)    | 4.70 (1.76-12.60)     |
| Granisetron+Steroid vs Dolasetron           | 2.76 (1.74-4.39)    | 2.77 (1.72-4.44)    | 2.46 (0.52-11.69)     | 1.75 (0.91-3.37)    | 9.06 (1.85-44.37)     |
| Granisetron+Steroid vs Dolasetron+Steroid   | 1.25 (0.66-2.34)    | 1.08 (0.55-2.12)    | NA                    | 0.36 (0.10-1.37)    | NA                    |
| Granisetron+Steroid vs Palonosetron         | 1.32 (0.83-2.08)    | 1.33 (0.83-2.13)    | 1.35 (0.51-3.61)      | 1.13 (0.52-2.45)    | 3.56 (0.86-14.72)     |
| Granisetron+Steroid vs Palonosetron+Steroid | 0.73 (0.46-1.16)    | 0.74 (0.46-1.18)    | 0.73 (0.31-1.71)      | 0.63 (0.24-1.60)    | 0.57 (0.15-2.14)      |
| Granisetron+Steroid vs Tropisetron          | 3.07 (1.96-4.81)    | 3.20 (1.95-5.24)    | 4.11 (0.94-18.06)     | 1.74 (0.57-5.30)    | 5.04 (1.20-21.12)     |
| Granisetron+Steroid vs Tropisetron+Steroid  | 0.72 (0.35-1.46)    | 0.86 (0.31-2.34)    | NA                    | 0.32 (0.05-1.82)    | 1.85 (0.27-12.88)     |
| Granisetron+Steroid vs Ramosetron           | 1.78 (1.01-3.13)    | 1.81 (0.98-3.32)    | 1.20 (0.28-5.03)      | 1.40 (0.70-2.77)    | 4.45 (0.19-102.54)    |
| Granisetron+Steroid vs Ramosetron+Steroid   | 0.89 (0.40-1.94)    | 0.90 (0.40-2.01)    | 0.63 (0.09-4.22)      | 0.75 (0.32-1.79)    | NA                    |
| Granisetron+Steroid vs Placebo              | 34.69 (14.19-84.85) | 35.27 (14.31-86.95) | 15.04 (0.49-460.13)   | 21.22 (6.99-64.45)  | 239.69 (7.79-7372.36) |
| Ondansetron vs Granisetron                  | 0.90 (0.73-1.12)    | 0.90 (0.72-1.12)    | 0.77 (0.40-1.50)      | 0.95 (0.67-1.35)    | 0.88 (0.49-1.59)      |
| Ondansetron vs Dolasetron                   | 1.13 (0.77-1.64)    | 1.11 (0.76-1.62)    | 0.95 (0.22-4.18)      | 0.94 (0.55-1.62)    | 1.70 (0.57-5.12)      |
| Ondansetron vs Dolasetron+Steroid           | 0.51 (0.27-0.95)    | 0.43 (0.22-0.85)    | NA                    | 0.20 (0.05-0.70)    | NA                    |
| Ondansetron vs Palonosetron                 | 0.54 (0.36-0.79)    | 0.53 (0.36-0.79)    | 0.52 (0.22-1.23)      | 0.61 (0.29-1.28)    | 0.67 (0.21-2.17)      |
| Ondansetron vs Palonosetron+Steroid         | 0.30 (0.18-0.50)    | 0.29 (0.17-0.50)    | 0.28 (0.11-0.71)      | 0.34 (0.13-0.86)    | 0.11 (0.02-0.63)      |
| Ondansetron vs Tropisetron                  | 1.25 (0.85-1.83)    | 1.28 (0.84-1.94)    | 1.59 (0.46-5.53)      | 0.94 (0.32-2.71)    | 0.95 (0.34-2.67)      |
| Ondansetron vs Tropisetron+Steroid          | 0.29 (0.15-0.59)    | 0.34 (0.13-0.90)    | NA                    | 0.17 (0.03-0.95)    | 0.35 (0.07-1.84)      |
| Ondansetron vs Ramosetron                   | 0.72 (0.43-1.22)    | 0.72 (0.41-1.27)    | 0.46 (0.11-1.93)      | 0.75 (0.40-1.41)    | 0.84 (0.04-17.40)     |
| Ondansetron vs Ramosetron+Steroid           | 0.36 (0.16-0.79)    | 0.36 (0.16-0.80)    | 0.24 (0.04-1.62)      | 0.41 (0.17-0.98)    | NA                    |
| Ondansetron vs Placebo                      | 14.13 (6.00-33.26)  | 14.12 (5.97-33.40)  | 5.80 (0.21-161.61)    | 11.43 (4.01-32.64)  | 44.99 (1.78-1136.95)  |
| Granisetron vs Dolasetron                   | 1.24 (0.84-1.85)    | 1.23 (0.82-1.84)    | 1.23 (0.29-5.19)      | 0.99 (0.56-1.76)    | 1.93 (0.55-6.72)      |
| Granisetron vs Dolasetron+Steroid           | 0.56 (0.30-1.06)    | 0.48 (0.25-0.94)    | NA                    | 0.21 (0.06-0.75)    | NA                    |
| Granisetron vs Palonosetron                 | 0.59 (0.40-0.87)    | 0.59 (0.40-0.87)    | 0.68 (0.31-1.47)      | 0.64 (0.33-1.27)    | 0.76 (0.27-2.10)      |
| Granisetron vs Palonosetron+Steroid         | 0.33 (0.20-0.54)    | 0.33 (0.20-0.55)    | 0.37 (0.14-0.96)      | 0.36 (0.14-0.92)    | 0.12 (0.02-0.63)      |
| Granisetron vs Tropisetron                  | 1.38 (0.93-2.04)    | 1.42 (0.93-2.18)    | 2.06 (0.50-8.48)      | 0.99 (0.34-2.86)    | 1.07 (0.38-3.04)      |

| <b>NO. OF PATIENTS WITHOUT VOMITING</b>     | <b>ALL STUDY DESIGNS</b> | <b>ALL RCTs</b>      | <b>LOW ROB RANDOMIZATION</b> | <b>CDDP YES (RCTs SGA)</b> | <b>CDDP NO (RCTs SGA)</b> |
|---------------------------------------------|--------------------------|----------------------|------------------------------|----------------------------|---------------------------|
| <b>Treatment Comparison</b>                 | <b>OR (95% CI)</b>       | <b>OR (95% CI)</b>   | <b>OR (95% CI)</b>           | <b>OR (95% CI)</b>         | <b>OR (95% CI)</b>        |
| Granisetron vs Tropisetron+Steroid          | 0.32 (0.16-0.65)         | 0.38 (0.14-1.01)     | NA                           | 0.18 (0.03-1.00)           | 0.39 (0.07-2.10)          |
| Granisetron vs Ramosetron                   | 0.80 (0.48-1.35)         | 0.80 (0.46-1.41)     | 0.60 (0.17-2.13)             | 0.79 (0.42-1.49)           | 0.95 (0.05-18.60)         |
| Granisetron vs Ramosetron+Steroid           | 0.40 (0.18-0.87)         | 0.40 (0.18-0.89)     | 0.32 (0.05-1.87)             | 0.43 (0.18-1.02)           | NA                        |
| Granisetron vs Placebo                      | 15.62 (6.61-36.90)       | 15.70 (6.61-37.28)   | 7.54 (0.25-224.32)           | 12.06 (4.13-35.21)         | 50.96 (1.91-1,357.86)     |
| Dolasetron vs Dolasetron+Steroid            | 0.45 (0.23-0.88)         | 0.39 (0.19-0.79)     | NA                           | 0.21 (0.07-0.66)           | NA                        |
| Dolasetron vs Palonosetron                  | 0.48 (0.30-0.76)         | 0.48 (0.30-0.77)     | 0.55 (0.16-1.84)             | 0.65 (0.27-1.56)           | 0.39 (0.08-1.97)          |
| Dolasetron vs Palonosetron+Steroid          | 0.26 (0.14-0.49)         | 0.27 (0.14-0.50)     | 0.30 (0.06-1.59)             | 0.36 (0.12-1.04)           | 0.06 (0.01-0.51)          |
| Dolasetron vs Tropisetron                   | 1.11 (0.66-1.88)         | 1.16 (0.66-2.01)     | 1.67 (0.24-11.58)            | 1.00 (0.31-3.22)           | 0.56 (0.12-2.53)          |
| Dolasetron vs Tropisetron+Steroid           | 0.26 (0.12-0.57)         | 0.31 (0.11-0.87)     | NA                           | 0.18 (0.03-1.08)           | 0.20 (0.03-1.51)          |
| Dolasetron vs Ramosetron                    | 0.64 (0.34-1.21)         | 0.65 (0.33-1.27)     | 0.49 (0.07-3.29)             | 0.80 (0.36-1.78)           | 0.49 (0.02-12.41)         |
| Dolasetron vs Ramosetron+Steroid            | 0.32 (0.14-0.76)         | 0.32 (0.13-0.78)     | 0.26 (0.03-2.51)             | 0.43 (0.16-1.18)           | NA                        |
| Dolasetron vs Placebo                       | 12.55 (4.97-31.70)       | 12.75 (5.01-32.43)   | 6.11 (0.16-233.03)           | 12.15 (3.78-39.05)         | 26.45 (0.87-802.40)       |
| Dolasetron+Steroid vs Palonosetron          | 1.05 (0.52-2.14)         | 1.23 (0.58-2.58)     | NA                           | 3.12 (0.73-13.31)          | NA                        |
| Dolasetron+Steroid vs Palonosetron+Steroid  | 0.59 (0.28-1.22)         | 0.68 (0.32-1.46)     | NA                           | 1.73 (0.36-8.32)           | NA                        |
| Dolasetron+Steroid vs Tropisetron           | 2.46 (1.20-5.02)         | 2.95 (1.37-6.37)     | NA                           | 4.80 (0.93-24.90)          | NA                        |
| Dolasetron+Steroid vs Tropisetron+Steroid   | 0.58 (0.23-1.42)         | 0.79 (0.25-2.53)     | NA                           | 0.87 (0.10-7.33)           | NA                        |
| Dolasetron+Steroid vs Ramosetron            | 1.42 (0.64-3.16)         | 1.67 (0.71-3.94)     | NA                           | 3.86 (0.95-15.72)          | NA                        |
| Dolasetron+Steroid vs Ramosetron+Steroid    | 0.71 (0.27-1.89)         | 0.83 (0.30-2.30)     | NA                           | 2.08 (0.45-9.61)           | NA                        |
| Dolasetron+Steroid vs Placebo               | 27.80 (9.70-79.61)       | 32.55 (11.02-96.12)  | NA                           | 58.60 (11.35-302.66)       | NA                        |
| Palonosetron vs Palonosetron+Steroid        | 0.55 (0.30-1.03)         | 0.55 (0.30-1.04)     | 0.54 (0.17-1.72)             | 0.55 (0.17-1.77)           | 0.16 (0.02-1.11)          |
| Palonosetron vs Tropisetron                 | 2.33 (1.38-3.94)         | 2.40 (1.38-4.18)     | 3.04 (0.67-13.78)            | 1.54 (0.44-5.39)           | 1.42 (0.33-6.09)          |
| Palonosetron vs Tropisetron+Steroid         | 0.55 (0.25-1.20)         | 0.65 (0.23-1.81)     | NA                           | 0.28 (0.04-1.76)           | 0.52 (0.07-3.69)          |
| Palonosetron vs Ramosetron                  | 1.35 (0.72-2.54)         | 1.36 (0.70-2.66)     | 0.88 (0.20-3.89)             | 1.23 (0.49-3.08)           | 1.25 (0.05-29.11)         |
| Palonosetron vs Ramosetron+Steroid          | 0.67 (0.29-1.59)         | 0.67 (0.28-1.63)     | 0.46 (0.07-3.23)             | 0.67 (0.22-1.99)           | NA                        |
| Palonosetron vs Placebo                     | 26.36 (10.41-66.72)      | 26.53 (10.41-67.63)  | 11.10 (0.36-344.61)          | 18.76 (5.33-66.06)         | 67.28 (2.16-2,093.47)     |
| Palonosetron+Steroid vs Tropisetron         | 4.20 (2.29-7.71)         | 4.34 (2.28-8.26)     | 5.60 (1.18-26.51)            | 2.78 (0.69-11.26)          | 8.88 (1.25-63.16)         |
| Palonosetron+Steroid vs Tropisetron+Steroid | 0.98 (0.44-2.22)         | 1.16 (0.39-3.44)     | NA                           | 0.51 (0.07-3.53)           | 3.26 (0.31-34.46)         |
| Palonosetron+Steroid vs Ramosetron          | 2.43 (1.20-4.92)         | 2.45 (1.16-5.16)     | 1.63 (0.33-7.98)             | 2.23 (0.74-6.71)           | 7.84 (0.26-236.00)        |
| Palonosetron+Steroid vs Ramosetron+Steroid  | 1.21 (0.50-2.97)         | 1.22 (0.48-3.05)     | 0.86 (0.11-6.47)             | 1.20 (0.35-4.16)           | NA                        |
| Palonosetron+Steroid vs Placebo             | 47.49 (17.71-127.35)     | 47.86 (17.68-129.55) | 20.50 (0.65-648.14)          | 33.91 (8.40-136.83)        | 422.04 (10.61-16,795.88)  |
| Tropisetron vs Tropisetron+Steroid          | 0.23 (0.12-0.46)         | 0.27 (0.11-0.64)     | NA                           | 0.18 (0.05-0.70)           | 0.37 (0.10-1.36)          |
| Tropisetron vs Ramosetron                   | 0.58 (0.32-1.06)         | 0.57 (0.28-1.12)     | 0.29 (0.04-1.94)             | 0.80 (0.24-2.69)           | 0.88 (0.04-20.71)         |
| Tropisetron vs Ramosetron+Steroid           | 0.29 (0.12-0.67)         | 0.28 (0.11-0.69)     | 0.15 (0.02-1.48)             | 0.43 (0.11-1.67)           | NA                        |
| Tropisetron vs Placebo                      | 11.32 (4.49-28.53)       | 11.03 (4.28-28.47)   | 3.66 (0.10-127.83)           | 12.20 (2.78-53.60)         | 47.53 (1.60-1,412.75)     |
| Tropisetron+Steroid vs Ramosetron           | 2.47 (1.06-5.75)         | 2.11 (0.69-6.40)     | NA                           | 4.42 (0.72-27.03)          | 2.40 (0.08-73.18)         |
| Tropisetron+Steroid vs Ramosetron+Steroid   | 1.23 (0.44-3.42)         | 1.04 (0.30-3.64)     | NA                           | 2.38 (0.35-16.07)          | NA                        |
| Tropisetron+Steroid vs Placebo              | 48.23 (16.13-144.23)     | 41.11 (11.34-149.11) | NA                           | 67.12 (9.06-497.09)        | 129.46 (3.41-4,908.53)    |
| Ramosetron vs Ramosetron+Steroid            | 0.50 (0.25-1.01)         | 0.50 (0.24-1.02)     | 0.53 (0.15-1.83)             | 0.54 (0.25-1.17)           | NA                        |
| Ramosetron vs Placebo                       | 19.53 (7.75-49.21)       | 19.52 (7.62-50.03)   | 12.58 (0.34-470.51)          | 15.19 (5.08-45.43)         | 53.83 (0.64-4,528.72)     |
| Ramosetron+Steroid vs Placebo               | 39.16 (12.88-119.03)     | 39.39 (12.80-121.23) | 23.89 (0.52-1,100.61)        | 28.19 (7.80-101.89)        | NA                        |

| NO. OF PATIENTS WITHOUT VOMITING                                                                                                                                                                                     | ALL STUDY DESIGNS        | ALL RCTs                 | LOW ROB RANDOMIZATION  | CDDP YES (RCTs SGA)    | CDDP NO (RCTs SGA)     |
|----------------------------------------------------------------------------------------------------------------------------------------------------------------------------------------------------------------------|--------------------------|--------------------------|------------------------|------------------------|------------------------|
| Treatment Comparison                                                                                                                                                                                                 | OR (95% CI)              | OR (95% CI)              | OR (95% CI)            | OR (95% CI)            | OR (95% CI)            |
| <i>Between-study variance in NMA</i>                                                                                                                                                                                 | 0.11                     | 0.11                     | 0.11                   | 0.14                   | 0.20                   |
| <i>Design-by-treatment interaction model for inconsistency (<math>\chi^2</math>, d.f., P-value, Between-study variance)</i>                                                                                          | 28.21 (21, 0.1344, 0.10) | 23.93 (17, 0.1214, 0.10) | 0.96 (3, 0.8118, 0.50) | 3.75 (8, 0.8791, 0.24) | 0.94 (1, 0.3331, 0.17) |
| <b>Abbreviations:</b> CDDP - Cisplatin; CI - confidence interval; NA - not applicable; NMA – network meta-analysis; OR - odds ratio; RCT - randomized controlled trial; ROB – risk of bias; SGA – sub-group analysis |                          |                          |                        |                        |                        |

**Appendix R. No. of patients without CINV – RCTs only**

Reference treatment: PLAC

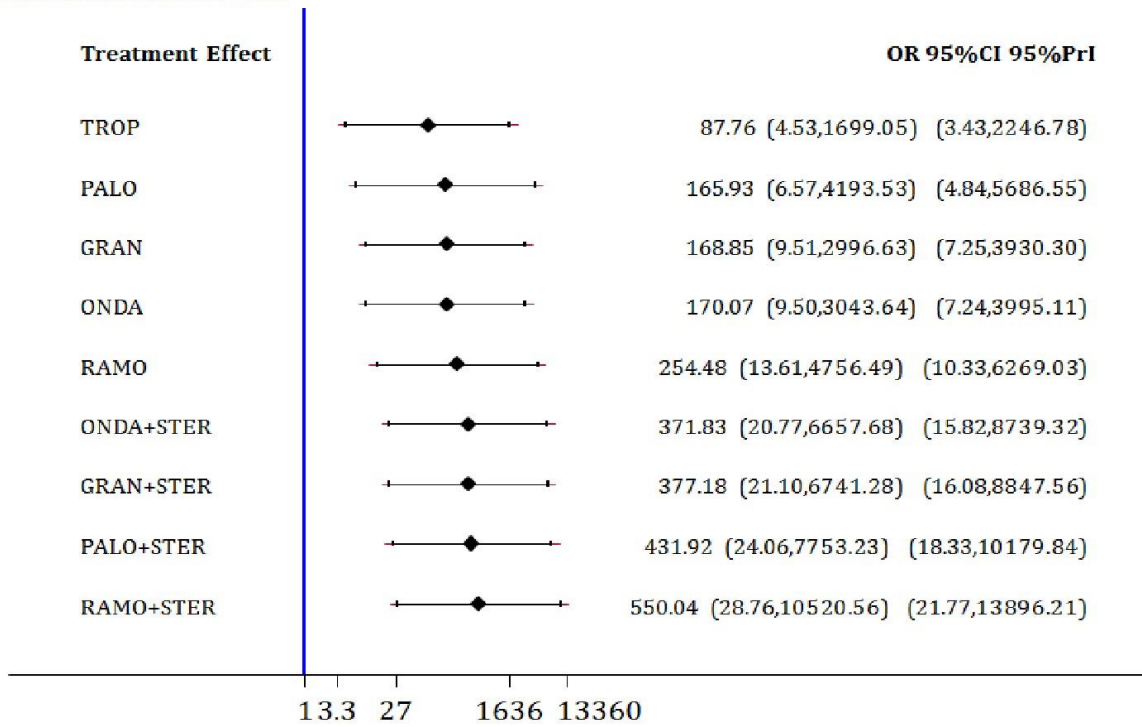

**Abbreviations:** CI - confidence interval; CINV – chemotherapy-induced nausea and vomiting; OR - odds ratio; PrI - prediction interval; RCT - randomized controlled trial

GRAN - granisetron; PALO - palonosetron; PLAC - placebo; ONDA - ondansetron; STER - steroid; TROP - tropisetron;

**Appendix S. No. of patients without CINV – RCTs only – SUCRA values for each treatment**

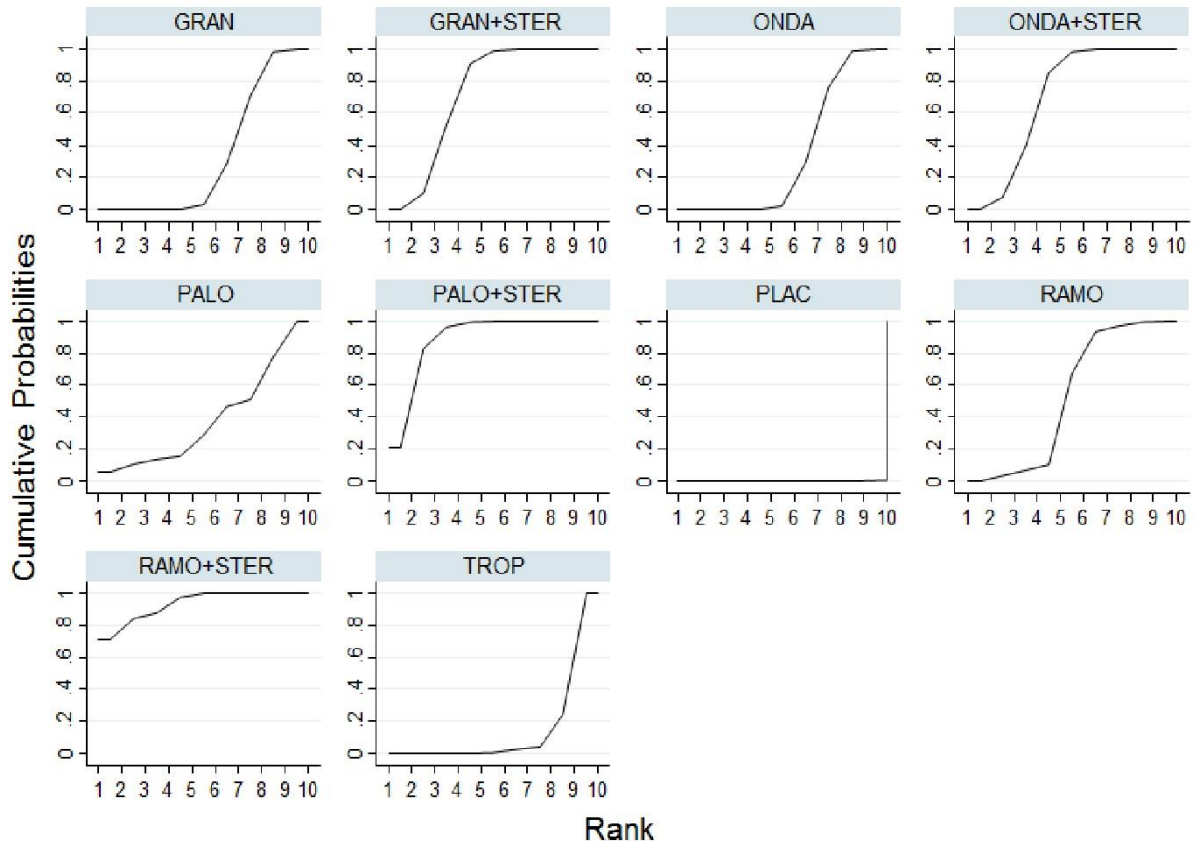

**Abbreviations:** CINV - chemotherapy-induced nausea and vomiting; RCT - randomized controlled trial; SUCRA – surface under the cumulative ranking curve

GRAN- granisetron; ONDA - ondansetron; PALO - palonosetron; PLAC - placebo; STER- steroid; TROP - tropisetron

## Appendix T. No. of patients without CINV sub-group analysis for Network meta-analysis

| NO. OF PATIENTS WITHOUT CINV                | ALL STUDY DESIGNS       | ALL RCTs                | LOW ROB RANDOMIZATION | CDDP YES (RCTs SGA)     | CDDP NO (RCTs SGA) |
|---------------------------------------------|-------------------------|-------------------------|-----------------------|-------------------------|--------------------|
| Treatment Comparison                        | OR (95% CI)             | OR (95% CI)             | OR (95% CI)           | OR (95% CI)             | OR (95% CI)        |
| Ondansetron+Steroid vs Granisetron+Steroid  | 0.99 (0.89-1.11)        | 0.99 (0.88-1.11)        | 0.98 (0.79-1.22)      | 1.06 (0.89-1.27)        | 1.00 (0.76-1.31)   |
| Ondansetron+Steroid vs Ondansetron          | 2.20 (1.66-2.93)        | 2.19 (1.64-2.91)        | 1.96 (1.12-3.42)      | 2.48 (1.63-3.77)        | 3.57 (1.55-8.20)   |
| Ondansetron+Steroid vs Granisetron          | 2.19 (1.75-2.74)        | 2.20 (1.76-2.76)        | 2.47 (1.58-3.85)      | 2.42 (1.77-3.31)        | 3.14 (1.74-5.66)   |
| Ondansetron+Steroid vs Dolasetron+Steroid   | 7.46 (1.30-42.94)       | NA                      | NA                    | NA                      | NA                 |
| Ondansetron+Steroid vs Palonosetron         | 2.26 (0.51-9.93)        | 2.24 (0.51-9.85)        | NA                    | 2.54 (0.56-11.52)       | NA                 |
| Ondansetron+Steroid vs Palonosetron+Steroid | 0.87 (0.73-1.03)        | 0.86 (0.72-1.02)        | 0.93 (0.74-1.17)      | 0.82 (0.56-1.19)        | 1.00 (0.70-1.43)   |
| Ondansetron+Steroid vs Tropisetron          | 2.67 (1.41-5.06)        | 4.24 (2.02-8.90)        | NA                    | 4.57 (1.72-12.16)       | 6.76 (1.87-24.37)  |
| Ondansetron+Steroid vs Tropisetron+Steroid  | 0.92 (0.49-1.73)        | NA                      | NA                    | NA                      | NA                 |
| Ondansetron+Steroid vs Ramosetron           | 1.82 (1.06-3.13)        | 1.46 (0.83-2.58)        | NA                    | 0.37 (0.10-1.42)        | 3.01 (1.09-8.27)   |
| Ondansetron+Steroid vs Ramosetron+Steroid   | 0.99 (0.54-1.80)        | 0.68 (0.35-1.32)        | NA                    | 0.20 (0.06-0.72)        | NA                 |
| Ondansetron+Steroid vs Placebo              | 370.51 (20.70-6,632.94) | 371.83 (20.77-6,657.68) | NA                    | 408.96 (22.66-7,382.46) | NA                 |
| Granisetron+Steroid vs Ondansetron          | 2.22 (1.68-2.92)        | 2.22 (1.69-2.92)        | 1.99 (1.10-3.63)      | 2.33 (1.60-3.41)        | 3.57 (1.60-7.94)   |
| Granisetron+Steroid vs Granisetron          | 2.21 (1.80-2.70)        | 2.23 (1.83-2.73)        | 2.51 (1.71-3.70)      | 2.28 (1.76-2.95)        | 3.14 (1.86-5.30)   |
| Granisetron+Steroid vs Dolasetron+Steroid   | 7.50 (1.31-43.02)       | NA                      | NA                    | NA                      | NA                 |
| Granisetron+Steroid vs Palonosetron         | 2.27 (0.52-9.96)        | 2.27 (0.52-9.97)        | NA                    | 2.39 (0.53-10.74)       | NA                 |
| Granisetron+Steroid vs Palonosetron+Steroid | 0.87 (0.74-1.02)        | 0.87 (0.74-1.03)        | 0.95 (0.76-1.18)      | 0.77 (0.51-1.17)        | 1.00 (0.74-1.35)   |
| Granisetron+Steroid vs Tropisetron          | 2.68 (1.42-5.07)        | 4.30 (2.06-8.97)        | NA                    | 4.30 (1.64-11.27)       | 6.76 (1.92-23.75)  |
| Granisetron+Steroid vs Tropisetron+Steroid  | 0.93 (0.49-1.74)        | NA                      | NA                    | NA                      | NA                 |
| Granisetron+Steroid vs Ramosetron           | 1.83 (1.07-3.14)        | 1.48 (0.84-2.61)        | NA                    | 0.35 (0.09-1.36)        | 3.01 (1.12-8.05)   |
| Granisetron+Steroid vs Ramosetron+Steroid   | 1.00 (0.55-1.81)        | 0.69 (0.35-1.34)        | NA                    | 0.19 (0.05-0.68)        | NA                 |
| Granisetron+Steroid vs Placebo              | 372.57 (20.85-6,658.80) | 377.18 (21.10-6,741.29) | NA                    | 385.22 (21.46-6,916.04) | NA                 |
| Ondansetron vs Granisetron                  | 1.00 (0.80-1.24)        | 1.01 (0.81-1.25)        | 1.26 (0.62-2.57)      | 0.98 (0.74-1.29)        | 0.88 (0.48-1.61)   |
| Ondansetron vs Dolasetron+Steroid           | 3.38 (0.58-19.83)       | NA                      | NA                    | NA                      | NA                 |
| Ondansetron vs Palonosetron                 | 1.02 (0.24-4.38)        | 1.02 (0.24-4.38)        | NA                    | 1.02 (0.24-4.38)        | NA                 |
| Ondansetron vs Palonosetron+Steroid         | 0.39 (0.29-0.54)        | 0.39 (0.29-0.54)        | 0.48 (0.26-0.87)      | 0.33 (0.19-0.58)        | 0.28 (0.12-0.66)   |
| Ondansetron vs Tropisetron                  | 1.21 (0.66-2.22)        | 1.94 (0.95-3.95)        | NA                    | 1.84 (0.73-4.65)        | 1.89 (0.59-6.05)   |
| Ondansetron vs Tropisetron+Steroid          | 0.42 (0.21-0.83)        | NA                      | NA                    | NA                      | NA                 |
| Ondansetron vs Ramosetron                   | 0.83 (0.51-1.34)        | 0.67 (0.40-1.12)        | NA                    | 0.15 (0.04-0.61)        | 0.84 (0.47-1.50)   |
| Ondansetron vs Ramosetron+Steroid           | 0.45 (0.26-0.79)        | 0.31 (0.16-0.59)        | NA                    | 0.08 (0.02-0.31)        | NA                 |
| Ondansetron vs Placebo                      | 168.11 (9.39-3,008.45)  | 170.07 (9.50-3,043.64)  | NA                    | 165.04 (9.17-2,968.80)  | NA                 |
| Granisetron vs Dolasetron+Steroid           | 3.40 (0.59-19.72)       | NA                      | NA                    | NA                      | NA                 |
| Granisetron vs Palonosetron                 | 1.03 (0.24-4.47)        | 1.02 (0.23-4.42)        | NA                    | 1.05 (0.24-4.60)        | NA                 |
| Granisetron vs Palonosetron+Steroid         | 0.39 (0.31-0.51)        | 0.39 (0.30-0.51)        | 0.38 (0.24-0.59)      | 0.34 (0.21-0.55)        | 0.32 (0.17-0.58)   |
| Granisetron vs Tropisetron                  | 1.22 (0.66-2.25)        | 1.92 (0.94-3.92)        | NA                    | 1.89 (0.75-4.77)        | 2.15 (0.69-6.74)   |
| Granisetron vs Tropisetron+Steroid          | 0.42 (0.22-0.81)        | NA                      | NA                    | NA                      | NA                 |
| Granisetron vs Ramosetron                   | 0.83 (0.49-1.39)        | 0.66 (0.38-1.15)        | NA                    | 0.15 (0.04-0.61)        | 0.96 (0.42-2.20)   |
| Granisetron vs Ramosetron+Steroid           | 0.45 (0.25-0.81)        | 0.31 (0.16-0.59)        | NA                    | 0.08 (0.02-0.31)        | NA                 |
| Granisetron vs Placebo                      | 168.85 (9.51-2,996.63)  | 168.85 (9.51-2,996.63)  | NA                    | 168.84 (9.51-2,996.55)  | NA                 |
| Dolasetron+Steroid vs Palonosetron          | 0.30 (0.03-2.99)        | NA                      | NA                    | NA                      | NA                 |
| Dolasetron+Steroid vs Palonosetron+Steroid  | 0.12 (0.02-0.67)        | NA                      | NA                    | NA                      | NA                 |
| Dolasetron+Steroid vs Tropisetron           | 0.36 (0.06-2.30)        | NA                      | NA                    | NA                      | NA                 |

| NO. OF PATIENTS WITHOUT CINV                                                                                                | ALL STUDY DESIGNS       | ALL RCTs                 | LOW ROB RANDOMIZATION  | CDDP YES (RCTs SGA)        | CDDP NO (RCTs SGA)  |
|-----------------------------------------------------------------------------------------------------------------------------|-------------------------|--------------------------|------------------------|----------------------------|---------------------|
| Treatment Comparison                                                                                                        | OR (95% CI)             | OR (95% CI)              | OR (95% CI)            | OR (95% CI)                | OR (95% CI)         |
| Dolasetron+Steroid vs Tropisetron+Steroid                                                                                   | 0.12 (0.02-0.79)        | NA                       | NA                     | NA                         | NA                  |
| Dolasetron+Steroid vs Ramosetron                                                                                            | 0.24 (0.04-1.52)        | NA                       | NA                     | NA                         | NA                  |
| Dolasetron+Steroid vs Ramosetron+Steroid                                                                                    | 0.13 (0.02-0.84)        | NA                       | NA                     | NA                         | NA                  |
| Dolasetron+Steroid vs Placebo                                                                                               | 49.68 (1.71-1,446.36)   | NA                       | NA                     | NA                         | NA                  |
| Palonosetron vs Palonosetron+Steroid                                                                                        | 0.38 (0.09-1.69)        | 0.38 (0.09-1.70)         | NA                     | 0.32 (0.07-1.53)           | NA                  |
| Palonosetron vs Tropisetron                                                                                                 | 1.18 (0.24-5.71)        | 1.89 (0.37-9.54)         | NA                     | 1.80 (0.32-10.07)          | NA                  |
| Palonosetron vs Tropisetron+Steroid                                                                                         | 0.41 (0.08-2.03)        | NA                       | NA                     | NA                         | NA                  |
| Palonosetron vs Ramosetron                                                                                                  | 0.81 (0.17-3.73)        | 0.65 (0.14-3.04)         | NA                     | 0.15 (0.02-1.10)           | NA                  |
| Palonosetron vs Ramosetron+Steroid                                                                                          | 0.44 (0.09-2.08)        | 0.30 (0.06-1.47)         | NA                     | 0.08 (0.01-0.57)           | NA                  |
| Palonosetron vs Placebo                                                                                                     | 164.01 (6.49-4,145.05)  | 165.93 (6.57-4,193.53)   | NA                     | 161.02 (6.34-4,088.18)     | NA                  |
| Palonosetron+Steroid vs Tropisetron                                                                                         | 3.08 (1.60-5.93)        | 4.92 (2.32-10.44)        | NA                     | 5.57 (1.95-15.88)          | 6.74 (1.85-24.56)   |
| Palonosetron+Steroid vs Tropisetron+Steroid                                                                                 | 1.06 (0.56-2.03)        | NA                       | NA                     | NA                         | NA                  |
| Palonosetron+Steroid vs Ramosetron                                                                                          | 2.10 (1.20-3.68)        | 1.70 (0.95-3.04)         | NA                     | 0.45 (0.11-1.83)           | 3.00 (1.07-8.44)    |
| Palonosetron+Steroid vs Ramosetron+Steroid                                                                                  | 1.15 (0.62-2.12)        | 0.79 (0.40-1.56)         | NA                     | 0.25 (0.07-0.92)           | NA                  |
| Palonosetron+Steroid vs Placebo                                                                                             | 427.99 (23.84-7,682.44) | 431.92 (24.06-7,753.23)  | NA                     | 498.61 (26.97-9,219.77)    | NA                  |
| Tropisetron vs Tropisetron+Steroid                                                                                          | 0.35 (0.14-0.84)        | NA                       | NA                     | NA                         | NA                  |
| Tropisetron vs Ramosetron                                                                                                   | 0.68 (0.34-1.36)        | 0.34 (0.14-0.83)         | NA                     | 0.08 (0.02-0.43)           | 0.45 (0.12-1.63)    |
| Tropisetron vs Ramosetron+Steroid                                                                                           | 0.37 (0.19-0.73)        | 0.16 (0.06-0.41)         | NA                     | 0.04 (0.01-0.22)           | NA                  |
| Tropisetron vs Placebo                                                                                                      | 138.80 (7.33-2,627.86)  | 87.76 (4.53-1,699.05)    | NA                     | 89.51 (4.36-1,837.70)      | NA                  |
| Tropisetron+Steroid vs Ramosetron                                                                                           | 1.98 (0.87-4.51)        | NA                       | NA                     | NA                         | NA                  |
| Tropisetron+Steroid vs Ramosetron+Steroid                                                                                   | 1.08 (0.45-2.55)        | NA                       | NA                     | NA                         | NA                  |
| Tropisetron+Steroid vs Placebo                                                                                              | 402.21 (21.03-7,692.43) | NA                       | NA                     | NA                         | NA                  |
| Ramosetron vs Ramosetron+Steroid                                                                                            | 0.54 (0.35-0.84)        | 0.46 (0.29-0.73)         | NA                     | 0.55 (0.34-0.89)           | NA                  |
| Ramosetron vs Placebo                                                                                                       | 203.34 (10.94-3,779.59) | 254.48 (13.61-4,756.49)  | NA                     | 1,107.86 (45.51-26,971.34) | NA                  |
| Ramosetron+Steroid vs Placebo                                                                                               | 373.77 (19.86-7,033.29) | 550.04 (28.76-10,520.55) | NA                     | 2,007.38 (85.54-47,106.68) | NA                  |
| <b>Between-study variance in NMA</b>                                                                                        | 0.00                    | 0.00                     | 0.00                   | 0.00                       | 0.01                |
| <b>Design-by-treatment interaction model for inconsistency (<math>\chi^2</math>, d.f., P-value, Between-study variance)</b> | 19.33 (8, 0.0132, 0.00) | 12.89 (6, 0.0449, 0.00)  | 0.09 (1, 0.7615, 0.03) | 0.05 (1, 0.8248, 0.00)     | 3.07(2,0.2157,0.05) |

**Abbreviations:** CDDP - cisplatin; CI - confidence interval; CINV - chemotherapy-induced nausea and vomiting; NA - not applicable; NMA – network meta-analysis; OR - odds ratio; RCT - randomized controlled trial; ROB – risk of bias; SGA – sub-group analysis



**Appendix U. No. of patients experiencing severe vomiting – RCTs only**

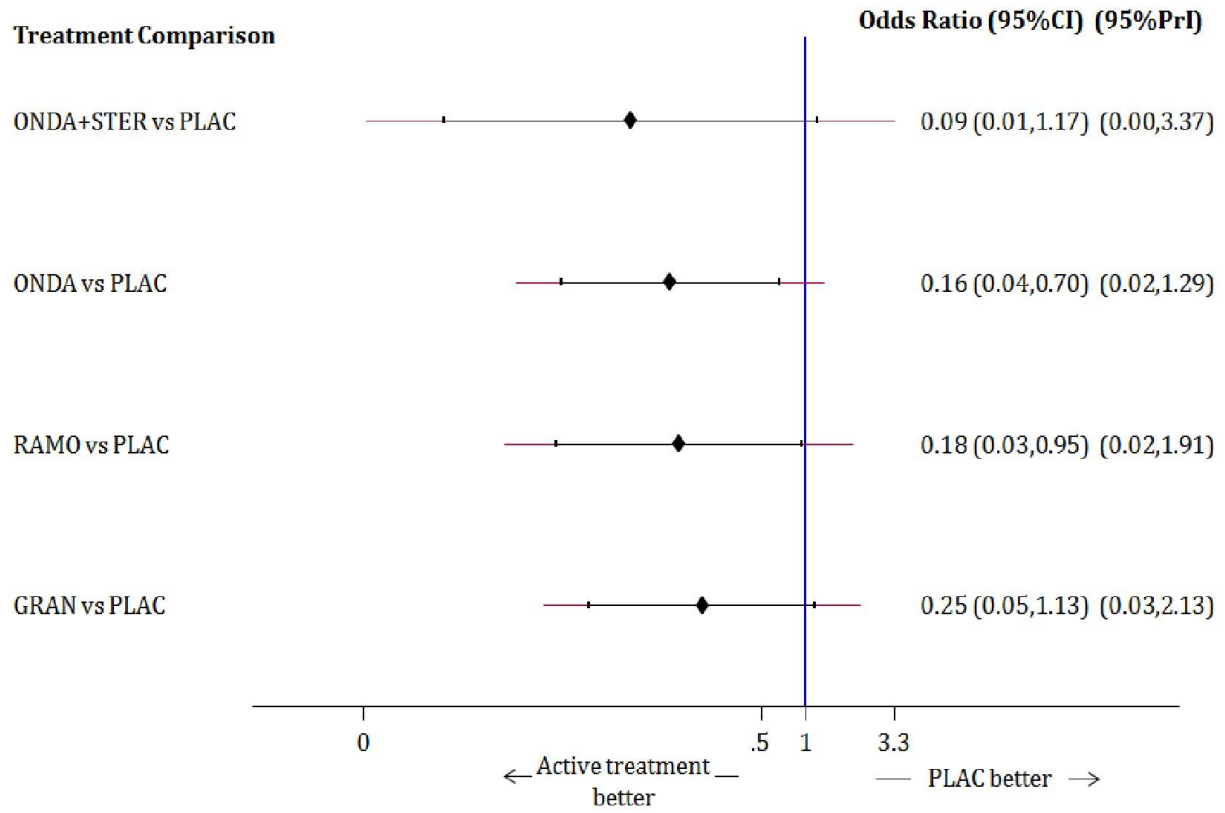

**Abbreviations:** CI - confidence interval; OR - odds ratio; PrI - prediction interval; RCT - randomized controlled trial

GRAN - granisetron; ONDA - ondansetron; PLAC - placebo; RAMO - ramosetron; STER - steroid

**Appendix V. No. of patients experiencing severe vomiting – RCTs only – SUCRA values for each treatment**

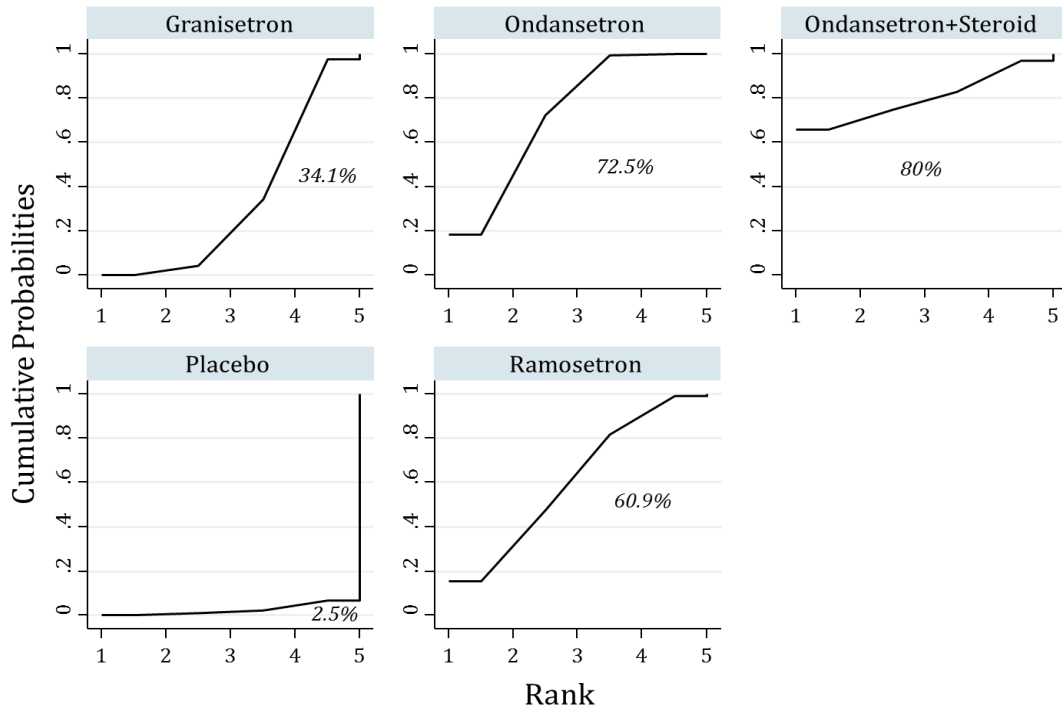

**Abbreviations:** RCT - randomized controlled trial; SUCRA – surface under the cumulative ranking curve

GRAN- granisetron; ONDA - ondansetron; PLAC - placebo; RAMO - ramosetron; STER - steroid

### Appendix W. No. of patients experiencing severe vomiting sub-group analysis for Network meta-analysis

| NO. OF PATENTS EXPERIENCING SEVERE VOMITING   | ALL STUDY DESIGNS   | All RCTs         | LOW ROB RANDOMIZATION | CDDP YES (RCTs SGA) | CDDP NO (RCTs SGA) |
|-----------------------------------------------|---------------------|------------------|-----------------------|---------------------|--------------------|
| Treatment Comparison                          | OR (95% CI)         | OR (95% CI)      | OR (95% CI)           | OR (95% CI)         | OR (95% CI)        |
| Ondansetron+Steroid vs Granisetron+Steroid    | 1.14 (0.18-7.14)    | NA               | NA                    | NA                  | NA                 |
| Ondansetron+Steroid vs Ondansetron            | 0.58 (0.07-4.55)    | 0.58 (0.07-4.56) | NA                    | 0.58 (0.07-4.98)    | NA                 |
| Ondansetron+Steroid vs Granisetron            | 0.38 (0.05-3.03)    | 0.38 (0.05-3.06) | NA                    | 0.27 (0.02-2.91)    | NA                 |
| Ondansetron+Steroid vs Tropisetron            | 0.25 (0.01-6.67)    | NA               | NA                    | NA                  | NA                 |
| Ondansetron+Steroid vs Tropisetron+Steroid    | 2.56 (0.26-25.00)   | NA               | NA                    | NA                  | NA                 |
| Ondansetron+Steroid vs Ramosetron             | 0.52 (0.06-4.76)    | 0.52 (0.06-4.68) | NA                    | 0.43 (0.04-4.71)    | NA                 |
| Ondansetron+Steroid vs Ramosetron+Steroid     | 1.11 (0.04-33.33)   | NA               | NA                    | NA                  | NA                 |
| Ondansetron+Steroid vs Placebo                | 0.09 (0.01-1.18)    | 0.09 (0.01-1.17) | NA                    | 0.08 (0.00-1.36)    | NA                 |
| Granisetron+Steroid vs Ondansetron            | 0.51 (0.03-8.33)    | NA               | NA                    | NA                  | NA                 |
| Granisetron+Steroid vs Granisetron            | 0.33 (0.02-5.26)    | NA               | NA                    | NA                  | NA                 |
| Granisetron+Steroid vs Tropisetron            | 0.22 (0.01-10.00)   | NA               | NA                    | NA                  | NA                 |
| Granisetron+Steroid vs Tropisetron+Steroid    | 2.27 (0.20-25.00)   | NA               | NA                    | NA                  | NA                 |
| Granisetron+Steroid vs Ramosetron             | 0.46 (0.03-7.69)    | NA               | NA                    | NA                  | NA                 |
| Granisetron+Steroid vs Ramosetron+Steroid     | 0.97 (0.06-16.67)   | NA               | NA                    | NA                  | NA                 |
| Granisetron+Steroid vs Placebo                | 0.08 (0.00-1.87)    | NA               | NA                    | NA                  | NA                 |
| Ondansetron vs Granisetron                    | 0.65 (0.45-0.94)    | 0.65 (0.45-0.94) | 0.70 (0.45-1.10)      | 0.46 (0.16-1.32)    | 0.65 (0.24-1.74)   |
| Ondansetron vs Tropisetron                    | 0.43 (0.03-5.56)    | NA               | NA                    | NA                  | NA                 |
| Ondansetron vs Tropisetron+Steroid            | 4.35 (0.20-100.00)  | NA               | NA                    | NA                  | NA                 |
| Ondansetron vs Ramosetron                     | 0.89 (0.41-1.92)    | 0.89 (0.41-1.94) | 0.82 (0.29-2.30)      | 0.73 (0.24-2.17)    | NA                 |
| Ondansetron vs Ramosetron+Steroid             | 1.89 (0.04-100.00)  | NA               | NA                    | NA                  | NA                 |
| Ondansetron vs Placebo                        | 0.16 (0.04-0.70)    | 0.16 (0.04-0.70) | 0.14 (0.01-1.40)      | 0.13 (0.02-0.88)    | 0.22 (0.02-2.67)   |
| Granisetron vs Tropisetron                    | 0.67 (0.05-8.33)    | NA               | NA                    | NA                  | NA                 |
| Granisetron vs Tropisetron+Steroid            | 6.67 (0.31-100.00)  | NA               | NA                    | NA                  | NA                 |
| Granisetron vs Ramosetron                     | 1.37 (0.65-2.94)    | 1.37 (0.64-2.92) | 1.17 (0.46-2.97)      | 1.60 (0.59-4.30)    | NA                 |
| Granisetron vs Ramosetron+Steroid             | 2.94 (0.06-100.00)  | NA               | NA                    | NA                  | NA                 |
| Granisetron vs Placebo                        | 0.25 (0.05-1.13)    | 0.25 (0.05-1.13) | 0.20 (0.02-2.08)      | 0.29 (0.03-2.56)    | 0.34 (0.02-4.94)   |
| Tropisetron vs Tropisetron+Steroid            | 10.00 (0.19-562.45) | NA               | NA                    | NA                  | NA                 |
| Tropisetron vs Ramosetron                     | 2.04 (0.18-25.00)   | NA               | NA                    | NA                  | NA                 |
| Tropisetron vs Ramosetron+Steroid             | 4.35 (0.04-478.83)  | NA               | NA                    | NA                  | NA                 |
| Tropisetron vs Placebo                        | 0.37 (0.02-7.12)    | NA               | NA                    | NA                  | NA                 |
| Tropisetron+Steroid vs Ramosetron             | 0.20 (0.01-4.76)    | NA               | NA                    | NA                  | NA                 |
| Tropisetron+Steroid vs Ramosetron+Steroid     | 0.43 (0.01-16.67)   | NA               | NA                    | NA                  | NA                 |
| Tropisetron+Steroid vs Placebo                | 0.04 (0.00-1.10)    | NA               | NA                    | NA                  | NA                 |
| Ramosetron vs Ramosetron+Steroid              | 2.13 (0.04-100.00)  | NA               | NA                    | NA                  | NA                 |
| Ramosetron vs Placebo                         | 0.18 (0.03-0.95)    | 0.18 (0.03-0.95) | 0.17 (0.01-2.13)      | 0.18 (0.02-1.62)    | NA                 |
| Ramosetron+Steroid vs Placebo                 | 0.08 (0.00-5.64)    | NA               | NA                    | NA                  | NA                 |
| Ramosetron + Steroid vs Granisetron + Steroid | NA                  | 0.00 (0.00-0.00) | NA                    | NA                  | NA                 |
| <i>Between-study variance in NMA</i>          | 0.00                | 0.00             | 0.00                  | 0.10                | 0.00               |

---

|                                                                                                                             |                        |                        |                      |                        |                      |
|-----------------------------------------------------------------------------------------------------------------------------|------------------------|------------------------|----------------------|------------------------|----------------------|
| <i>Design-by-treatment interaction model for inconsistency (<math>\chi^2</math>, d.f., P-value, Between-study variance)</i> | 0.34 (1, 0.5627, 0.00) | 0.33 (1, 0.5628, 0.00) | NA - No closed loops | 1.57 (1, 0.2099, 0.00) | NA - No closed loops |
|-----------------------------------------------------------------------------------------------------------------------------|------------------------|------------------------|----------------------|------------------------|----------------------|

---

**Abbreviations:** CDDP - cisplatin; CI - confidence interval; NA – not applicable; NMA - network meta-analysis; OR - odds ratio; RCT - randomized controlled trial; ROB - risk of bias, SGA - sub-group analysis

---

## Appendix X. Included studies in our review versus previous systematic reviews

| Study                     | Jordan, 2007 | Jantunen, 1996 | Billio, 2010 (Cochrane) | Philips, 2010 (Cochrane) | # of patients |
|---------------------------|--------------|----------------|-------------------------|--------------------------|---------------|
| Kovacs, 2016              | NO           | NO             | NO                      | NO                       | 331           |
| Anvari, 2015              | NO           | NO             | NO                      | NO                       | 117           |
| Gabrail, 2015(a)          | NO           | NO             | NO                      | NO                       | 45            |
| Gabrail, 2015(b)          | NO           | NO             | NO                      | NO                       | 35            |
| Karthaus, 2015            | NO           | NO             | NO                      | NO                       | 739           |
| Kim K, 2015               | NO           | NO             | NO                      | NO                       | 32            |
| Kim JE, 2015              | NO           | NO             | NO                      | NO                       | 261           |
| Kimura, 2015              | NO           | NO             | NO                      | NO                       | 24            |
| Ohzawa, 2015              | NO           | NO             | NO                      | NO                       | 40            |
| Raftopolous, 2015         | NO           | NO             | NO                      | NO                       | 1395          |
| Zoto, 2015                | NO           | NO             | NO                      | NO                       | 155           |
| Kim JS, 2014              | NO           | NO             | NO                      | NO                       | 180           |
| Murakami, 2014            | NO           | NO             | NO                      | NO                       | 46            |
| Sanmukhani, 2014          | NO           | NO             | NO                      | NO                       | 214           |
| Boccia, 2013              | NO           | NO             | NO                      | NO                       | 639           |
| Huang, 2013               | NO           | NO             | NO                      | NO                       | 236           |
| Keat, 2013                | NO           | NO             | NO                      | NO                       | 52            |
| Wenzell, 2013             | NO           | NO             | NO                      | NO                       | 40            |
| Blazer, 2012              | NO           | NO             | NO                      | NO                       | 305           |
| Endo, 2012                | NO           | NO             | NO                      | NO                       | 105           |
| Ithimakin, 2012           | NO           | NO             | NO                      | NO                       | 162           |
| Noor, 2012                | NO           | NO             | NO                      | NO                       | 30            |
| Roscoe, 2012              | NO           | NO             | NO                      | NO                       | 944           |
| Tsuji, 2012               | NO           | NO             | NO                      | NO                       | 359           |
| Boccia, 2011              | NO           | NO             | NO                      | NO                       | 621           |
| Dong, 2011                | NO           | NO             | NO                      | NO                       | 89            |
| Giralt, 2011              | NO           | NO             | NO                      | NO                       | 73            |
| Pielichowski, 2011        | NO           | NO             | NO                      | NO                       | 60            |
| Piyush, 2011*             | NO           | NO             | NO                      | NO                       | 90            |
| Siddique, 2011            | NO           | NO             | NO                      | NO                       | 60            |
| Tian, 2011                | NO           | NO             | NO                      | NO                       | 144           |
| Ghosh, 2010               | NO           | NO             | NO                      | NO                       | 1213          |
| Ho, 2010                  | NO           | NO             | NO                      | NO                       | 285           |
| Kaushal, 2010             | NO           | NO             | NO                      | NO                       | 30            |
| Mattiuzzi, 2010           | NO           | NO             | NO                      | NO                       | 143           |
| Keyhanian, 2009           | NO           | NO             | NO                      | NO                       | 138           |
| Maemondo, 2009            | NO           | NO             | NO                      | NO                       | 231           |
| Rzepecki, 2009            | NO           | NO             | NO                      | NO                       | 46            |
| Saito, 2009               | NO           | NO             | YES                     | NO                       | 1114          |
| Segawa, 2009              | NO           | NO             | NO                      | NO                       | 204           |
| Taguchi, 2009             | NO           | NO             | NO                      | NO                       | 59            |
| Yonemura, 2009            | NO           | NO             | NO                      | NO                       | 179           |
| Yu, 2009                  | NO           | NO             | NO                      | NO                       | 208           |
| Chen, 2008                | NO           | NO             | NO                      | NO                       | 424           |
| Fabi, 2008                | NO           | NO             | NO                      | NO                       | 89            |
| Nagel, 2008               | NO           | NO             | NO                      | NO                       | 25            |
| Sepúlveda-Vildósola, 2008 | NO           | NO             | NO                      | NO                       | 100           |
| Abali, 2007               | NO           | NO             | NO                      | NO                       | 158           |
| Berrak, 2007              | NO           | NO             | NO                      | YES                      | 18            |
| Carreca, 2007*            | NO           | NO             | NO                      | NO                       | 67            |
| Hamadani, 2007            | NO           | NO             | NO                      | NO                       | 126           |
| Herrstedt, 2007           | NO           | NO             | NO                      | NO                       | 82            |
| Kadota, 2007*             | NO           | NO             | NO                      | NO                       | 60            |
| Pectasides, 2007          | NO           | NO             | NO                      | NO                       | 134           |
| Shi, 2007                 | NO           | NO             | NO                      | NO                       | 50            |
| Aapro, 2006               | YES          | NO             | YES                     | NO                       | 667           |
| Adel, 2006 *              | NO           | NO             | NO                      | NO                       | 176           |
| Pinarli, 2006             | NO           | NO             | NO                      | NO                       | 38            |

|                                                         |     |    |     |     |     |
|---------------------------------------------------------|-----|----|-----|-----|-----|
| Shikimori, 2006                                         | NO  | NO | NO  | NO  | 63  |
| Tabei, 2006*                                            | NO  | NO | NO  | NO  | 204 |
| Trifilio, 2006*                                         | NO  | NO | NO  | NO  | 69  |
| Babaoglu, 2005                                          | NO  | NO | NO  | NO  | 216 |
| Buyukavci, 2005                                         | NO  | NO | NO  | NO  | 22  |
| Cheirsilpa, 2005                                        | NO  | NO | NO  | NO  | 73  |
| Corapcioglu, 2005                                       | NO  | NO | NO  | YES | 22  |
| Kurnianda, 2005                                         | NO  | NO | NO  | NO  | 39  |
| Lindley, 2005                                           | NO  | NO | NO  | NO  | 232 |
| Mandanas, 2005                                          | NO  | NO | NO  | NO  | 197 |
| Yano, 2005                                              | NO  | NO | NO  | NO  | 39  |
| Dempsey, 2004                                           | YES | NO | NO  | NO  | 224 |
| Eisenberg, 2004                                         | NO  | NO | NO  | NO  | 161 |
| Jaing, 2004                                             | NO  | NO | NO  | YES | 66  |
| Kim, 2004                                               | NO  | NO | NO  | NO  | 105 |
| Tan, 2004                                               | YES | NO | NO  | NO  | 26  |
| Tantipalakorn, 2004                                     | NO  | NO | NO  | NO  | 109 |
| Villalon, 2004                                          | NO  | NO | NO  | NO  | 283 |
| Aapro, 2003                                             | NO  | NO | NO  | NO  | 267 |
| Bhatia, 2003                                            | NO  | NO | NO  | NO  | 80  |
| Carmichael, 2003                                        | NO  | NO | NO  | NO  | 41  |
| Eisenberg, 2003                                         | YES | NO | NO  | NO  | 569 |
| Gralla, 2003                                            | YES | NO | NO  | NO  | 563 |
| Koizumi, 2003                                           | NO  | NO | NO  | NO  | 30  |
| Matsuoka, 2003                                          | NO  | NO | NO  | NO  | 50  |
| Sagae, 2003                                             | NO  | NO | NO  | NO  | 138 |
| Steiner, 2003                                           | NO  | NO | NO  | NO  | 62  |
| Feng, 2002a                                             | NO  | NO | NO  | NO  | 73  |
| Feng, 2002b                                             | NO  | NO | NO  | NO  | 111 |
| Kang, 2002                                              | NO  | NO | YES | NO  | 194 |
| Noda, 2002                                              | NO  | NO | YES | NO  | 136 |
| Noda, 2002                                              | NO  | NO | NO  | NO  | 84  |
| Raynov, 2002                                            | NO  | NO | NO  | NO  | 101 |
| Yamac, 2002                                             | NO  | NO | NO  | NO  | 97  |
| Aksoylar, 2001                                          | YES | NO | NO  | NO  | 51  |
| de Wit, 2001                                            | YES | NO | NO  | NO  | 40  |
| Fox-Geiman, 2001                                        | NO  | NO | NO  | NO  | 102 |
| Koralewski, 2001                                        | NO  | NO | NO  | NO  | 76  |
| Liaw, 2001                                              | NO  | NO | NO  | NO  | 721 |
| Ozgur Tan, 2001                                         | NO  | NO | NO  | NO  | 25  |
| Parker, 2001                                            | NO  | NO | NO  | YES | 26  |
| Tsavaris, 2001a                                         | YES | NO | NO  | NO  | 106 |
| Tsavaris, 2001b                                         | NO  | NO | NO  | NO  | 100 |
| Watters, 2001                                           | NO  | NO | NO  | NO  | 274 |
| Zeng, 2001                                              | NO  | NO | NO  | NO  | 69  |
| Abang, 2000                                             | NO  | NO | NO  | NO  | 60  |
| Barrajon, 2000                                          | YES | NO | NO  | NO  | 120 |
| Chiou, 2000                                             | YES | NO | NO  | NO  | 51  |
| Chua, 2000                                              | YES | NO | NO  | NO  | 89  |
| Fauser, 2000                                            | NO  | NO | NO  | NO  | 210 |
| Forni, 2000                                             | YES | NO | NO  | NO  | 90  |
| Friedman, 2000                                          | NO  | NO | NO  | NO  | 230 |
| Herrington, 2000                                        | YES | NO | NO  | NO  | 61  |
| Hesketh, 2000                                           | NO  | NO | NO  | NO  | 97  |
| Koenig, 2000                                            | NO  | NO | NO  | NO  | 40  |
| Oge, 2000                                               | YES | NO | NO  | NO  | 106 |
| Raynov, 2000                                            | NO  | NO | NO  | NO  | 72  |
| Roila [The Italian Group for Antiemetic Research], 2000 | NO  | NO | NO  | NO  | 708 |
| Slaby, 2000                                             | NO  | NO | NO  | NO  | 45  |
| Stewart, 2000                                           | NO  | NO | NO  | NO  | 16  |
| White, 2000                                             | NO  | NO | NO  | YES | 428 |
| Coppes, 1999a                                           | NO  | NO | NO  | NO  | 46  |
| Coppes, 1999b                                           | NO  | NO | NO  | NO  | 32  |
| Davidson, 1999                                          | NO  | NO | NO  | NO  | 427 |

|                                                         |     |    |     |     |      |
|---------------------------------------------------------|-----|----|-----|-----|------|
| Kandemir, 1999                                          | NO  | NO | NO  | NO  | 89   |
| Komada, 1999                                            | NO  | NO | NO  | YES | 36   |
| Lazarus, 1999                                           | NO  | NO | NO  | NO  | 43   |
| Needles, 1999                                           | NO  | NO | NO  | NO  | 357  |
| Orchard, 1999                                           | NO  | NO | NO  | YES | 187  |
| Raynov, 1999                                            | NO  | NO | NO  | NO  | 35   |
| Sandoval, 1999                                          | NO  | NO | NO  | YES | 31   |
| Sigsgaard, 1999                                         | NO  | NO | NO  | NO  | 223  |
| Stiakaki, 1999                                          | NO  | NO | NO  | NO  | 23   |
| Tatsumi, 1999                                           | NO  | NO | NO  | NO  | 186  |
| The Italian Multicenter Study Group, 1999               | NO  | NO | NO  | NO  | 532  |
| Tsavaris, 1999                                          | NO  | NO | NO  | NO  | 76   |
| Tsuchida, 1999                                          | NO  | NO | NO  | YES | 44   |
| Uchida, 1999                                            | NO  | NO | NO  | NO  | 29   |
| Yalcin, 1999                                            | YES | NO | NO  | NO  | 54   |
| Birch, 1998                                             | NO  | NO | NO  | NO  | 70   |
| Brown, 1998                                             | NO  | NO | NO  | NO  | 49   |
| Gralla, 1998                                            | YES | NO | YES | NO  | 1054 |
| Handberg, 1998                                          | NO  | NO | NO  | NO  | 90   |
| Kalaycio, 1998                                          | NO  | NO | NO  | NO  | 45   |
| Kleisbauer, 1998                                        | NO  | NO | NO  | NO  | 308  |
| Kris, 1998                                              | NO  | NO | NO  | NO  | 44   |
| Krzakowski, 1998                                        | YES | NO | NO  | NO  | 530  |
| Latreille, 1998                                         | NO  | NO | NO  | NO  | 435  |
| Martoni, 1998                                           | YES | NO | NO  | NO  | 198  |
| Perez, 1998                                             | YES | NO | NO  | NO  | 1085 |
| Perez, 1998                                             | NO  | NO | NO  | NO  | 573  |
| Poon, 1998                                              | NO  | NO | NO  | NO  | 20   |
| Ritter, 1998                                            | NO  | NO | NO  | NO  | 393  |
| Scoponi, 1998                                           | NO  | NO | NO  | NO  | 134  |
| Sorbe, 1998                                             | NO  | NO | NO  | NO  | 282  |
| Spector, 1998                                           | YES | NO | YES | NO  | 371  |
| Tsavaris, 1998                                          | NO  | NO | NO  | NO  | 104  |
| Zeidman, 1998                                           | NO  | NO | NO  | NO  | 58   |
| Beck, 1997                                              | NO  | NO | NO  | NO  | 402  |
| Chang, 1997                                             | NO  | NO | NO  | NO  | 51   |
| Chevallier, 1997                                        | NO  | NO | NO  | NO  | 226  |
| Davidson, 1997                                          | NO  | NO | NO  | NO  | 406  |
| du Bois, 1997                                           | NO  | NO | NO  | NO  | 189  |
| Farley, 1997                                            | NO  | NO | NO  | NO  | 119  |
| Fumoleau, 1997                                          | NO  | NO | NO  | NO  | 420  |
| Gridelli, 1997                                          | NO  | NO | NO  | NO  | 230  |
| Grote, 1997                                             | NO  | NO | NO  | NO  | 307  |
| Harris, 1997                                            | NO  | NO | NO  | NO  | 608  |
| Kasimis, 1997                                           | NO  | NO | NO  | NO  | 30   |
| Kigawa, 1997                                            | NO  | NO | NO  | NO  | 85   |
| Kris, 1997                                              | NO  | NO | NO  | NO  | 75   |
| Lofters, 1997                                           | YES | NO | NO  | NO  | 696  |
| Mustacchi, 1997                                         | NO  | NO | NO  | NO  | 105  |
| Park, 1997                                              | YES | NO | YES | NO  | 97   |
| Pectasides, 1997                                        | YES | NO | NO  | NO  | 80   |
| Perez, 1997                                             | YES | NO | NO  | NO  | 353  |
| Roila [The Italian Group for Antiemetic Research], 1997 | NO  | NO | NO  | NO  | 318  |
| Rubenstein, 1997                                        | NO  | NO | NO  | NO  | 320  |
| Advani, 1996                                            | NO  | NO | NO  | NO  | 91   |
| Audhuy, 1996                                            | YES | NO | YES | NO  | 474  |
| Barrenetxea, 1996                                       | NO  | NO | NO  | NO  | NR   |
| Belkacemi, 1996                                         | NO  | NO | NO  | NO  | 36   |
| Brock, 1996                                             | NO  | NO | NO  | YES | 187  |
| Crucitt, 1996                                           | NO  | NO | NO  | NO  | 133  |
| de Wit, 1996                                            | NO  | NO | NO  | NO  | 20   |
| Fausser, 1996a                                          | NO  | NO | NO  | NO  | 309  |
| Fausser, 1996b                                          | YES | NO | NO  | NO  | 399  |

|                                                       |     |     |     |     |     |
|-------------------------------------------------------|-----|-----|-----|-----|-----|
| Fujimoto, 1996                                        | NO  | NO  | NO  | NO  | 40  |
| Gaedicke, 1996                                        | NO  | NO  | NO  | NO  | 49  |
| Hesketh, 1996a                                        | NO  | NO  | NO  | NO  | 69  |
| Hesketh, 1996b                                        | YES | NO  | YES | NO  | 609 |
| Jorgensen, 1996                                       | NO  | NO  | NO  | NO  | 100 |
| Leonardi, 1996                                        | NO  | NO  | NO  | NO  | 118 |
| Martoni, 1996                                         | YES | NO  | YES | NO  | 124 |
| Massida & Ionta, 1996                                 | YES | NO  | NO  | NO  | 60  |
| Matsui, 1996                                          | NO  | NO  | NO  | NO  | 70  |
| Olver, 1996                                           | NO  | NO  | NO  | NO  | 604 |
| Peterson, 1996                                        | NO  | NO  | NO  | NO  | 104 |
| Yeilding, 1996                                        | NO  | NO  | NO  | NO  | 62  |
| Adams, 1995                                           | NO  | YES | NO  | NO  | 126 |
| Agura, 1995a                                          | NO  | NO  | NO  | NO  | 30  |
| Agura, 1995b                                          | NO  | NO  | NO  | NO  | 30  |
| Alfieri, 1995                                         | NO  | NO  | NO  | NO  | 28  |
| Alvarez, 1995                                         | NO  | NO  | NO  | YES | 34  |
| Bleiberg, 1995                                        | NO  | NO  | NO  | NO  | 930 |
| Bonneterre, 1995                                      | YES | NO  | NO  | NO  | 150 |
| Chiou, 1995                                           | NO  | YES | NO  | NO  | 40  |
| Contu, 1995                                           | NO  | NO  | NO  | NO  | 120 |
| DiBenedetto, 1995                                     | NO  | NO  | NO  | NO  | 81  |
| Dick, 1995                                            | NO  | NO  | NO  | YES | 30  |
| Fedele, 1995                                          | NO  | NO  | NO  | NO  | 25  |
| Gebbia, 1995                                          | NO  | NO  | NO  | NO  | 262 |
| Hahlen, 1995                                          | NO  | NO  | NO  | YES | 88  |
| Hesketh, 1995                                         | NO  | NO  | NO  | NO  | 146 |
| Italian Group for<br>Antiemetic Research,<br>1995     | NO  | NO  | YES | NO  | 973 |
| Labar, 1995                                           | NO  | NO  | NO  | NO  | 52  |
| Latreille, 1995                                       | NO  | YES | NO  | NO  | 292 |
| Mantovani, 1995                                       | YES | NO  | YES | NO  | 117 |
| Marty, 1995                                           | YES | NO  | YES | NO  | 231 |
| Navari, 1995a                                         | NO  | YES | NO  | NO  | 536 |
| Navari, 1995b                                         | YES | NO  | YES | NO  | 987 |
| Stewart, 1995                                         | YES | NO  | NO  | NO  | 488 |
| The Italian Group for<br>Antiemetic Research,<br>1995 | NO  | YES | NO  | NO  | 408 |
| Tsavaris, 1995a                                       | NO  | NO  | NO  | NO  | 80  |
| Tsavaris, 1995b                                       | NO  | YES | NO  | NO  | 84  |
| Ahn, 1994                                             | NO  | NO  | NO  | NO  | 49  |
| Carmichael, 1994                                      | NO  | YES | NO  | NO  | 278 |
| Chevallier, 1994                                      | NO  | NO  | NO  | NO  | 101 |
| Chiu, 1994                                            | NO  | NO  | NO  | NO  | 56  |
| Conroy, 1994                                          | NO  | NO  | NO  | NO  | 164 |
| Cubeddu, 1994                                         | NO  | YES | NO  | NO  | 324 |
| Gebbia, 1994a                                         | YES | NO  | YES | NO  | 166 |
| Gebbia, 1994b                                         | NO  | NO  | NO  | NO  | 158 |
| Heron, 1994                                           | NO  | YES | NO  | NO  | 357 |
| Hesketh, 1994                                         | NO  | YES | NO  | NO  | 275 |
| Hulstaert, 1994                                       | NO  | NO  | NO  | NO  | 445 |
| Joss, 1994                                            | NO  | YES | NO  | NO  | 207 |
| Kaizer, 1994                                          | NO  | NO  | NO  | NO  | 295 |
| Kris, 1994                                            | NO  | NO  | NO  | NO  | 89  |
| Lim, 1994                                             | NO  | NO  | NO  | NO  | 55  |
| Merrouche, 1994                                       | NO  | NO  | NO  | NO  | 25  |
| Navari, 1994                                          | YES | NO  | NO  | NO  | 184 |
| Noble, 1994                                           | YES | NO  | NO  | NO  | 359 |
| Riviere, 1994                                         | NO  | NO  | NO  | NO  | 157 |
| Ruff, 1994                                            | YES | NO  | YES | NO  | 496 |
| Sorbe, 1994                                           | NO  | NO  | NO  | NO  | 63  |
| Suarez, 1994                                          | NO  | NO  | NO  | NO  | 44  |
| Tsavaris, 1994                                        | NO  | NO  | NO  | NO  | 90  |
| Tyson, 1994                                           | NO  | NO  | NO  | NO  | 44  |



|                                                              |         |         |         |         |     |
|--------------------------------------------------------------|---------|---------|---------|---------|-----|
| Van Belle, 1994a                                             | NO      | NO      | NO      | NO      | 143 |
| Van Belle, 1994b                                             | NO      | NO      | NO      | NO      | 74  |
| Beck, 1993                                                   | NO      | YES     | NO      | NO      | 349 |
| Bosi, 1993                                                   | NO      | NO      | NO      | NO      | 40  |
| Buser, 1993                                                  | NO      | NO      | NO      | NO      | 82  |
| Chevallier, 1993                                             | NO      | NO      | NO      | NO      | 281 |
| Cunningham, 1993                                             | NO      | NO      | NO      | NO      | 32  |
| de Wet, 1993                                                 | NO      | NO      | NO      | NO      | 91  |
| Grunberg, 1993                                               | NO      | NO      | NO      | NO      | 125 |
| Herrstedt, 1993                                              | NO      | NO      | NO      | NO      | 30  |
| Hunter, 1993                                                 | NO      | NO      | NO      | NO      | 284 |
| Jantunen, 1993                                               | YES     | NO      | NO      | NO      | 166 |
| Levitt, 1993                                                 | NO      | YES     | NO      | NO      | 164 |
| Madej, 1993                                                  | NO      | NO      | NO      | NO      | 115 |
| Pisters, 1993                                                | NO      | NO      | NO      | NO      | 22  |
| Rath, 1993                                                   | NO      | YES     | NO      | NO      | 113 |
| Ribiero, 1993                                                | NO      | NO      | NO      | NO      | 145 |
| Smith (Granisetron Study Group), 1993                        | NO      | NO      | NO      | NO      | 504 |
| Beck, 1992                                                   | YES     | NO      | NO      | NO      | 699 |
| Blijham, 1992                                                | NO      | NO      | NO      | NO      | 909 |
| Bots, 1992                                                   | NO      | NO      | NO      | NO      | 125 |
| Dicato, 1992                                                 | NO      | NO      | NO      | NO      | 324 |
| Dundee, 1992                                                 | NO      | NO      | NO      | NO      | 233 |
| Jantunen, 1992                                               | YES     | NO      | NO      | NO      | 47  |
| Seynaeve, 1992                                               | YES     | NO      | NO      | NO      | 535 |
| Sledge, 1992                                                 | NO      | YES     | NO      | NO      | 46  |
| Soukop, 1992                                                 | NO      | YES     | NO      | NO      | 187 |
| Fraschini, 1991                                              | NO      | NO      | NO      | NO      | 80  |
| Gandara, 1991                                                | NO      | NO      | NO      | NO      | 274 |
| Hainsworth, 1991                                             | NO      | YES     | NO      | NO      | 274 |
| Jones, 1991                                                  | NO      | YES     | NO      | NO      | 112 |
| Lemerle, 1991                                                | NO      | NO      | NO      | NO      | 24  |
| Marschner, 1991                                              | NO      | YES     | NO      | NO      | 122 |
| Roila, 1991                                                  | NO      | YES     | NO      | NO      | 102 |
| Seynaeve, 1991                                               | NO      | NO      | NO      | NO      | 35  |
| Smith, 1991                                                  | NO      | YES     | NO      | NO      | 31  |
| Smyth, 1991                                                  | NO      | YES     | NO      | NO      | 100 |
| Warr, 1991                                                   | NO      | NO      | NO      | NO      | 152 |
| Addelman, 1990                                               | NO      | NO      | NO      | NO      | 24  |
| Bonneterre, 1990                                             | NO      | YES     | NO      | NO      | 75  |
| Cubeddu, 1990a                                               | NO      | NO      | NO      | NO      | 20  |
| Cubeddu, 1990b                                               | NO      | YES     | NO      | NO      | 28  |
| Cupissol, 1990                                               | NO      | YES     | NO      | NO      | 28  |
| De Mulder, 1990                                              | NO      | YES     | NO      | NO      | 121 |
| Falkson, 1990                                                | NO      | NO      | NO      | NO      | 56  |
| Kaasa, 1990                                                  | NO      | YES     | NO      | NO      | 93  |
| Khojasteh, 1990                                              | NO      | NO      | NO      | NO      | 36  |
| Marty, 1990a                                                 | NO      | NO      | NO      | NO      | 228 |
| Marty, 1990b                                                 | NO      | YES     | NO      | NO      | 97  |
| Cunningham, 1989                                             | NO      | NO      | NO      | NO      | 16  |
| Grunberg, 1989                                               | NO      | NO      | NO      | NO      | 43  |
| De Hann, 1988                                                | NO      | NO      | NO      | NO      | 13  |
| <b>Total number of patients not included in other review</b> | 44, 840 | 53, 443 | 50, 602 | 57, 215 |     |

\* Includes unpublished data (Adel 2006, Tabei 2006, Trifilio 2006, Carreca 2007, Kadota 2007, Piyush 2011)

## Appendix Y. List of excluded studies from previous systematic reviews

| Study                                                       | Jordan, 2007 | Jantunen, 1996 | Bilio, 2010 (Cochrane) | Philips, 2010 (Cochrane) | Reason for exclusion        |
|-------------------------------------------------------------|--------------|----------------|------------------------|--------------------------|-----------------------------|
| Anderson et al, 1994                                        | NO           | YES            | NO                     | NO                       | No Comparator               |
| Andrews et al, 1992                                         | NO           | YES            | NO                     | NO                       | No relevant population      |
| Andrews et al, 1993                                         | NO           | YES            | NO                     | NO                       | No relevant population      |
| Barrajon et al, 2000                                        | YES          | NO             | NO                     | NO                       | CA >10 years old            |
| Basade et al, 1996                                          | NO           | NO             | NO                     | YES                      | No 5-HT3                    |
| Bosnjak et al, 2006                                         | YES          | NO             | NO                     | NO                       | Not a relevant study design |
| Bremer, 1992                                                | NO           | YES            | NO                     | NO                       | No Comparator               |
| Bubalo et al, 2001                                          | YES          | NO             | NO                     | NO                       | No comparator               |
| Chan et al, 1987                                            | NO           | NO             | NO                     | YES                      | No 5-HT3                    |
| Chang et al, 1996                                           | NO           | YES            | NO                     | NO                       | No Comparator               |
| Cooper et al, 1992                                          | NO           | YES            | NO                     | NO                       | Not a relevant study design |
| Cubeddu et al, 1992                                         | NO           | YES            | NO                     | NO                       | No 5-HT3                    |
| Cubeddu et al, 1993                                         | NO           | YES            | NO                     | NO                       | Not a relevant study design |
| Cunningham et al, 1996                                      | NO           | YES            | NO                     | NO                       | No Comparator               |
| Dalzell et al, 1986                                         | NO           | NO             | NO                     | YES                      | No 5-HT3                    |
| De Wit et al, 1996                                          | NO           | YES            | NO                     | NO                       | Not a relevant study design |
| del Giglio et al, 2000                                      | YES          | NO             | NO                     | NO                       | Not a relevant study design |
| Doherty, 1999)                                              | YES          | NO             | NO                     | NO                       | Not a relevant study design |
| du Bois, 1998                                               | YES          | NO             | NO                     | NO                       | Not a relevant study design |
| Ekert et al, 1979                                           | NO           | NO             | NO                     | YES                      | No 5-HT3                    |
| Fetting et al, 1982                                         | NO           | YES            | NO                     | NO                       | No 5-HT3                    |
| Freeman et al, 1992                                         | NO           | YES            | NO                     | NO                       | No relevant population      |
| French Ondansetron Study Group, 1995                        | NO           | YES            | NO                     | NO                       | No Comparator               |
| Graham-Pole et al, 1986                                     | NO           | NO             | NO                     | YES                      | No 5-HT3                    |
| Gralla et al, 1981                                          | NO           | YES            | NO                     | NO                       | No 5-HT3                    |
| Hirota et al, 1993                                          | NO           | NO             | NO                     | YES                      | NE                          |
| Hue at al, 1998                                             | YES          | NO             | NO                     | NO                       | NE                          |
| Italian Group for Antiemetic Research in Radiotherapy, 1999 | YES          | NO             | NO                     | NO                       | No relevant population      |
| Jantunen et al, 1993                                        | NO           | YES            | NO                     | NO                       | No 5-HT3                    |
| Jones et al, 1992                                           | NO           | YES            | NO                     | NO                       | Not a relevant study design |
| Jordan et al, 2005                                          | YES          | NO             | NO                     | NO                       | Not a relevant study design |
| Kaiser et al, 2002                                          | YES          | NO             | NO                     | NO                       | No Comparator               |
| Kamanabrou, 1992                                            | YES          | NO             | NO                     | NO                       | Not a relevant study design |
| Kris et al, 1987                                            | NO           | YES            | NO                     | NO                       | No 5-HT3                    |
| None, 2000                                                  | YES          | NO             | NO                     | NO                       | Not a relevant study design |
| None, 2000                                                  | YES          | NO             | NO                     | NO                       | Not a relevant study design |
| Laszlo, 1983                                                | YES          | NO             | NO                     | NO                       | Not a relevant study design |
| Mabro et al, 2000                                           | NO           | NO             | NO                     | YES                      | NE                          |
| Mabro et al, 1999                                           | YES          | NO             | NO                     | NO                       | NE                          |
| Mantel et al, 1959                                          | NO           | YES            | NO                     | NO                       | No relevant population      |
| Marshall et al,                                             | NO           | NO             | NO                     | YES                      | No 5-HT3                    |

|                                                               |     |     |    |     |                             |
|---------------------------------------------------------------|-----|-----|----|-----|-----------------------------|
| 1989                                                          |     |     |    |     |                             |
| Marty, 1992                                                   | NO  | YES | NO | NO  | No Comparator               |
| Medler et al, 1994                                            | NO  | YES | NO | NO  | CA >10 years old            |
| Mehta et al, 1997                                             | NO  | NO  | NO | YES | No Comparator               |
| Mehta et al, 1986                                             | NO  | NO  | NO | YES | No 5-HT3                    |
| Mendarte et al, 2000                                          | YES | NO  | NO | NO  | Not a relevant study design |
| Miner et al, 1986                                             | NO  | YES | NO | NO  | No relevant population      |
| Monde et al, 1994                                             | YES | NO  | NO | NO  | CA >10 years old            |
| Morrow et al, 1995                                            | NO  | YES | NO | NO  | Not a relevant study design |
| Multinational Association for Supportive Care in Cancer, 2005 | YES | NO  | NO | NO  | Not a relevant study design |
| Nakamura et al, 1999                                          | YES | NO  | NO | NO  | CA >10 years old            |
| Navari et al, 1993                                            | NO  | YES | NO | NO  | No Comparator               |
| Newberry et al, 1993                                          | YES | NO  | NO | NO  | No relevant population      |
| Nicolai et al, 1993                                           | NO  | YES | NO | NO  | No Comparator               |
| Noguera et al, 2001                                           | NO  | NO  | NO | YES | NE                          |
| Osoba et al, 1996                                             | YES | NO  | NO | NO  | No 5-HT3                    |
| Pinkerton et al, 1993                                         | YES | NO  | NO | NO  | CA >10 years old            |
| Pollera et al, 1989                                           | NO  | YES | NO | NO  | No 5-HT3                    |
| Roila et al, 1988                                             | NO  | YES | NO | NO  | No 5-HT3                    |
| Safonova et al, 1999                                          | NO  | NO  | NO | YES | NE                          |
| Sismondi et al, 1994                                          | NO  | YES | NO | NO  | CA >10 years old            |
| Sorbe et al, 1994                                             | NO  | YES | NO | NO  | No Comparator               |
| Sorbe et al, 1994                                             | NO  | YES | NO | NO  | No Comparator               |
| Suarez et al, 1994                                            | NO  | NO  | NO | YES | CA >10 years old            |
| Swann et al, 1979                                             | NO  | NO  | NO | YES | No 5-HT3                    |
| Tejedor et al, 1999                                           | NO  | NO  | NO | YES | Not a relevant study design |
| The Italian Group for Antiemetic Research, 1993               | NO  | YES | NO | NO  | No Comparator               |
| Tonato et al, 1991                                            | NO  | YES | NO | NO  | Not a relevant study design |
| Warr et al, 1992                                              | NO  | YES | NO | NO  | No Comparator               |
| Whitehead, 2002                                               | YES | NO  | NO | NO  | Not a relevant study design |
| Wilder-Smith et al, 1993                                      | NO  | YES | NO | NO  | Not a relevant study design |
| Yusuf et al, 1985                                             | YES | NO  | NO | NO  | No relevant population      |
| Zhang et al, 1996                                             | YES | NO  | NO | NO  | NE                          |

**Abbreviations:** CA - conference abstract; NE - non-English; NR - not reported
